# Supplementary material for: Dysregulation of human ClpP using small molecules with piperazine-based scaffold for diffuse intrinsic pontine glioma therapy validated by patient-derived tumor organoids
Source: Research Square preprint supplement (doi:10.21203/rs.3.rs-8230151/v1), 2026-01-14
Supplement: Supplementary file 1 [file 4f2c6e4057bedceab23d01db.docx]

**Supplementary Information**

**Dysregulation of human ClpP using small molecules with piperazine-based scaffold for diffuse intrinsic pontine glioma therapy validated by patient-derived tumor organoids**

Morena Miciaccia1, Domenico Armenise1, Olga Maria Baldelli1, Anselma Liturri1, Mariachiara Mammone2, Giovanni Graziano2, Marialessandra Contino2, Francesca Rizzo3, Paola Loguercio Polosa3, Francesco Bruni3, Clémence Deligne4, Laura Broutier4, Gianfranco Cavallaro5, Cosimo Gianluca Fortuna5, Anna Tolomeo6, Cadell Green7, Alessandro Bonifazi7, Emily Majaesic8, Marim M. Barghash9, Nok Pang Josh Lee9, Walid A. Houry8,9, Carmen Gratteri10, Carmine Talarico11, Silvana Filieri12, Giuseppe Micalizzi13, Danilo Donnarumma13, Paola Dugo13,14, Luigi Mondello13,14, Annamaria Sardanelli12, Javad Nazarian15, Savina Ferorelli1, Maria Grazia Perrone1*, Antonio Scilimati1*

1Research Laboratory for Woman and Child Health, Department of Pharmacy - Pharmaceutical Sciences, University of Bari “Aldo Moro”, 70125 Bari, Italy;

2Department of Pharmacy - Pharmaceutical Sciences, University of Bari “Aldo Moro”, 70125 Bari, Italy;

3Department of Biosciences, Biotechnologies and Environment, University of Bari “Aldo Moro”, 70125 Bari, Italy;

4Childhood Cancer & Cell Death Team (C3 Team), Consortium South-ROCK, LabEx DEVweCAN, Institut Convergence Plascan, Centre Léon Bérard, Centre de Recherche en Cancérologie de Lyon (CRCL), Université Claude Bernard Lyon 1, INSERM 1052, CNRS 5286, 69008 Lyon, France;

5Laboratory of Molecular Modelling and Heterocyclic Compounds ModHet, Department of Chemical Sciences, University of Catania, 95125 Catania, Italy;

6ITELPHARMA, ITEL Telecomunicazioni S.R.L., 70037 Ruvo di Puglia, Italy;

7Department of Pharmacology and Toxicology, Center for Addiction Sciences and Therapeutics, University of Texas Medical Branch, Galveston, TX 77555, USA;

8Department of Chemistry, University of Toronto, Toronto, Ontario M5S 3H6, Canada;

9Department of Biochemistry, University of Toronto, Toronto, Ontario M5G 1M1, Canada;

10LIGHT S.c.a.r.l., 25123 Brescia, Italy;

11Dompé Farmaceutici SpA, EXSCALATE, I-80131 Napoli, Italy;

12Department of Basic Medical Sciences, Neuroscience and Sense Organs, University of Bari “Aldo Moro”, 70124 Bari, Italy;

13Messina Institute of Technology c/o Department of Chemical, Biological, Pharmaceutical and Environmental Sciences, former Veterinary School, University of Messina, 98168 Messina, Italy;

14Chromaleont s.r.l., c/o Department of Chemical, Biological, Pharmaceutical and Environmental Sciences, former Veterinary School, University of Messina, 98168 Messina, Italy;

15Children's Research Center, University Children's Hospital Zurich, Zurich, Switzerland.

**Content:**

1. 1H NMR, 13C NMR and HPLC chromatograms of the target compounds.
2. **Table S1.** Radioligand Binding Data for *h*D2R and *h*D3R.
3. **Table S2.** Crystallographic data and refinement statistics
4. **Table S3.** List of fatty acids detected in SH-SY5Y and SU-DIPG-36 cell lines untreated and treated with **ONC201** and **26** (DA29).
5. **Table S4.** List of lysophosphocholine (LPC), phoshocholine (PC), and sphingomyelin (SM) detected in SH-SY5Y and SU-DIPG-36 cell lines untreated and treated with **ONC201** and **26** (DA29).
6. **Table S5.** List of triglycerides (TGs) detected in SH-SY5Y and SU-DIPG-36 cell lines untreated and treated with **ONC201** and **26** (DA29).
7. **Table S6.** Choline-containing lipids identified in the SU-DIPG-36 and SH-SY5Y cell lines.
8. **Table S7.** Triacylglycerols (TG) identified in SU-DIP-G36 and SH-SY5Y cell lines.
9. **Figure S1**. FLAP analysis and Molecular docking with AutoDock Vina of **26** (DA29) and **ZK53** (PDB code: 8HGK)
10. **Figure S2**. Histograms relative to the percentage content of choline-containing lipids (LPCs, PCs and SMs).
11. **Figure S3**. Histograms relative to the percentage content of TGs.
12. **1H NMR, 13C NMR and HPLC chromatograms of the target compounds and references**

1,4-Bis(4-chlorobenzyl)piperazine **1** (DA1)

1H-NMR (300 MHz, CDCl3)


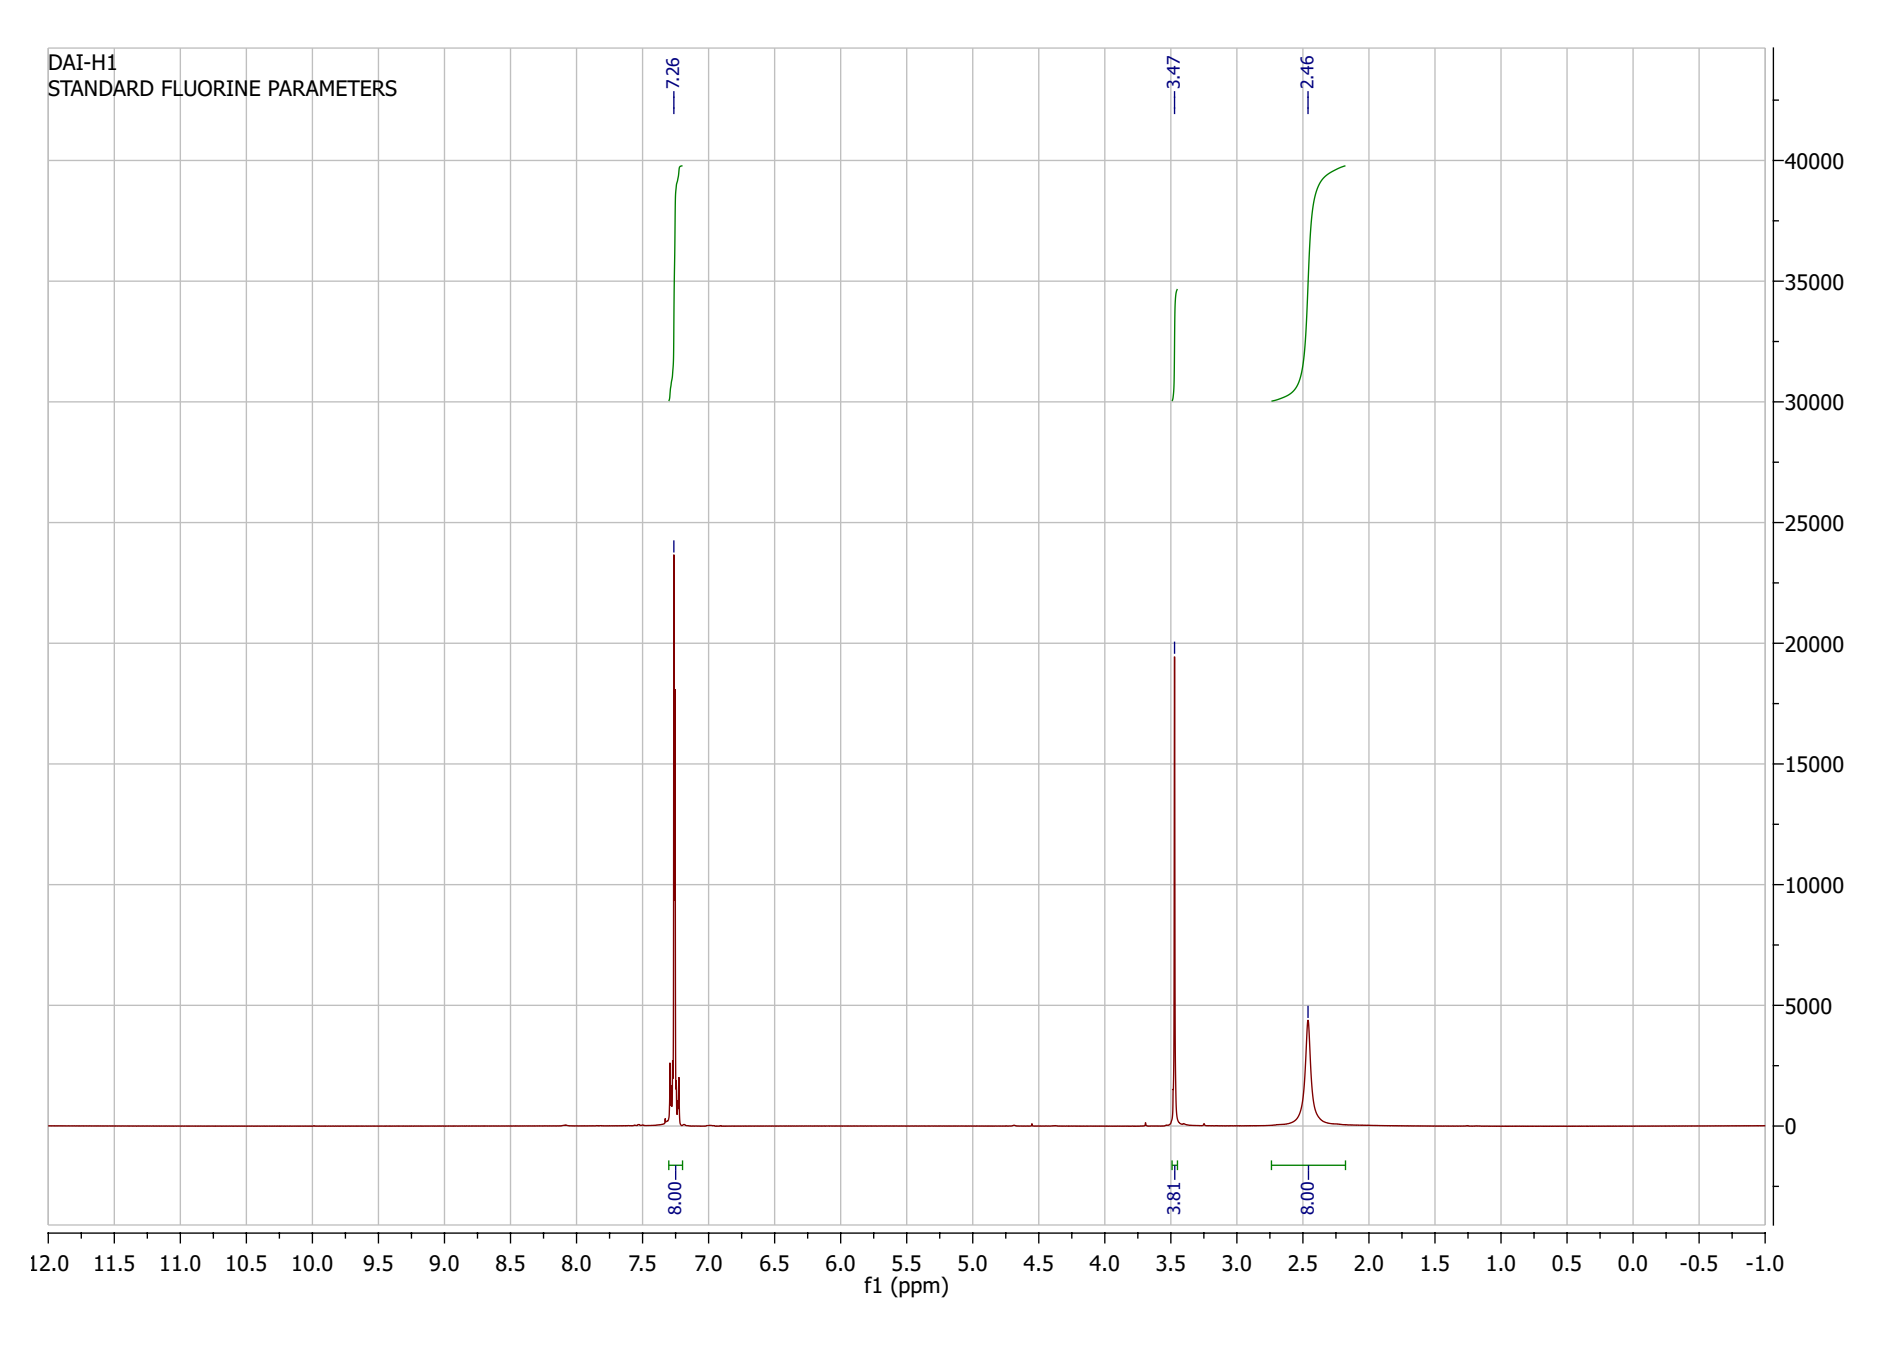


13C-NMR (125 MHz, CDCl3)


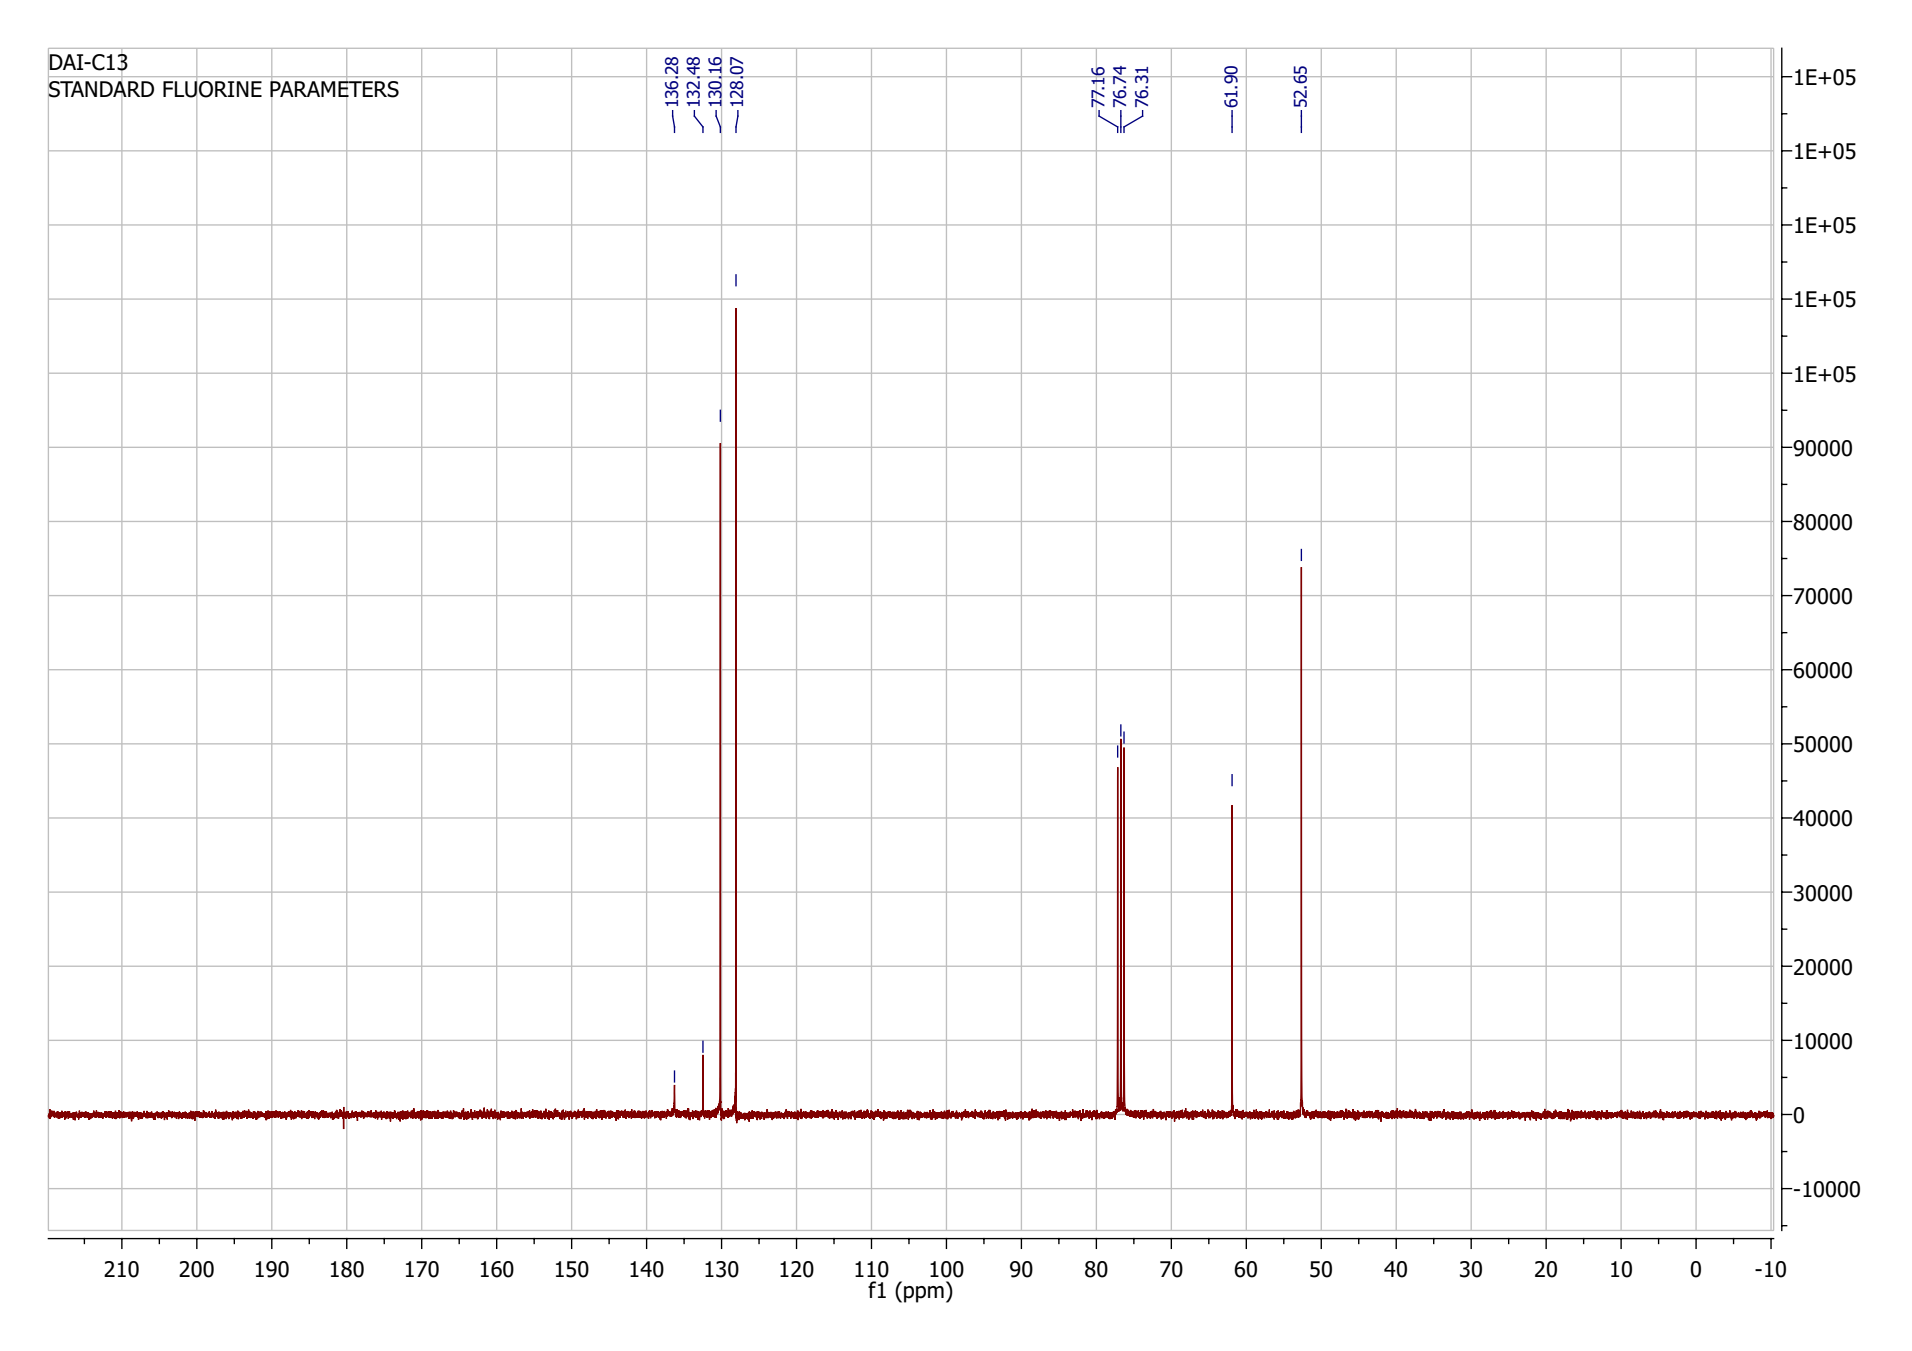


HPLC chromatogram (purity >98 %)


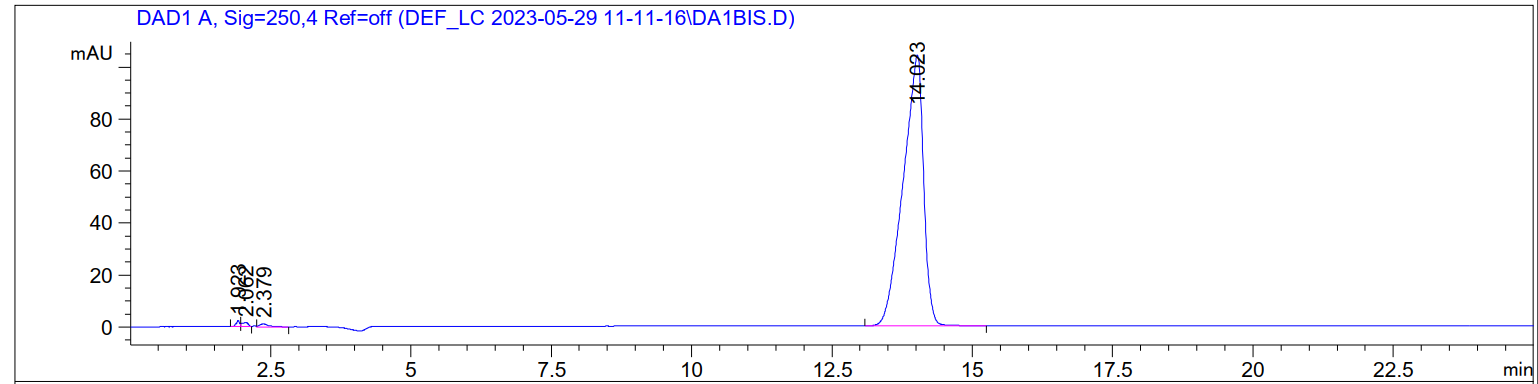


1,4-Bis(4-cyanobenzyl)piperazine **2** (DA4)

1H-NMR (500 MHz, CDCl3)


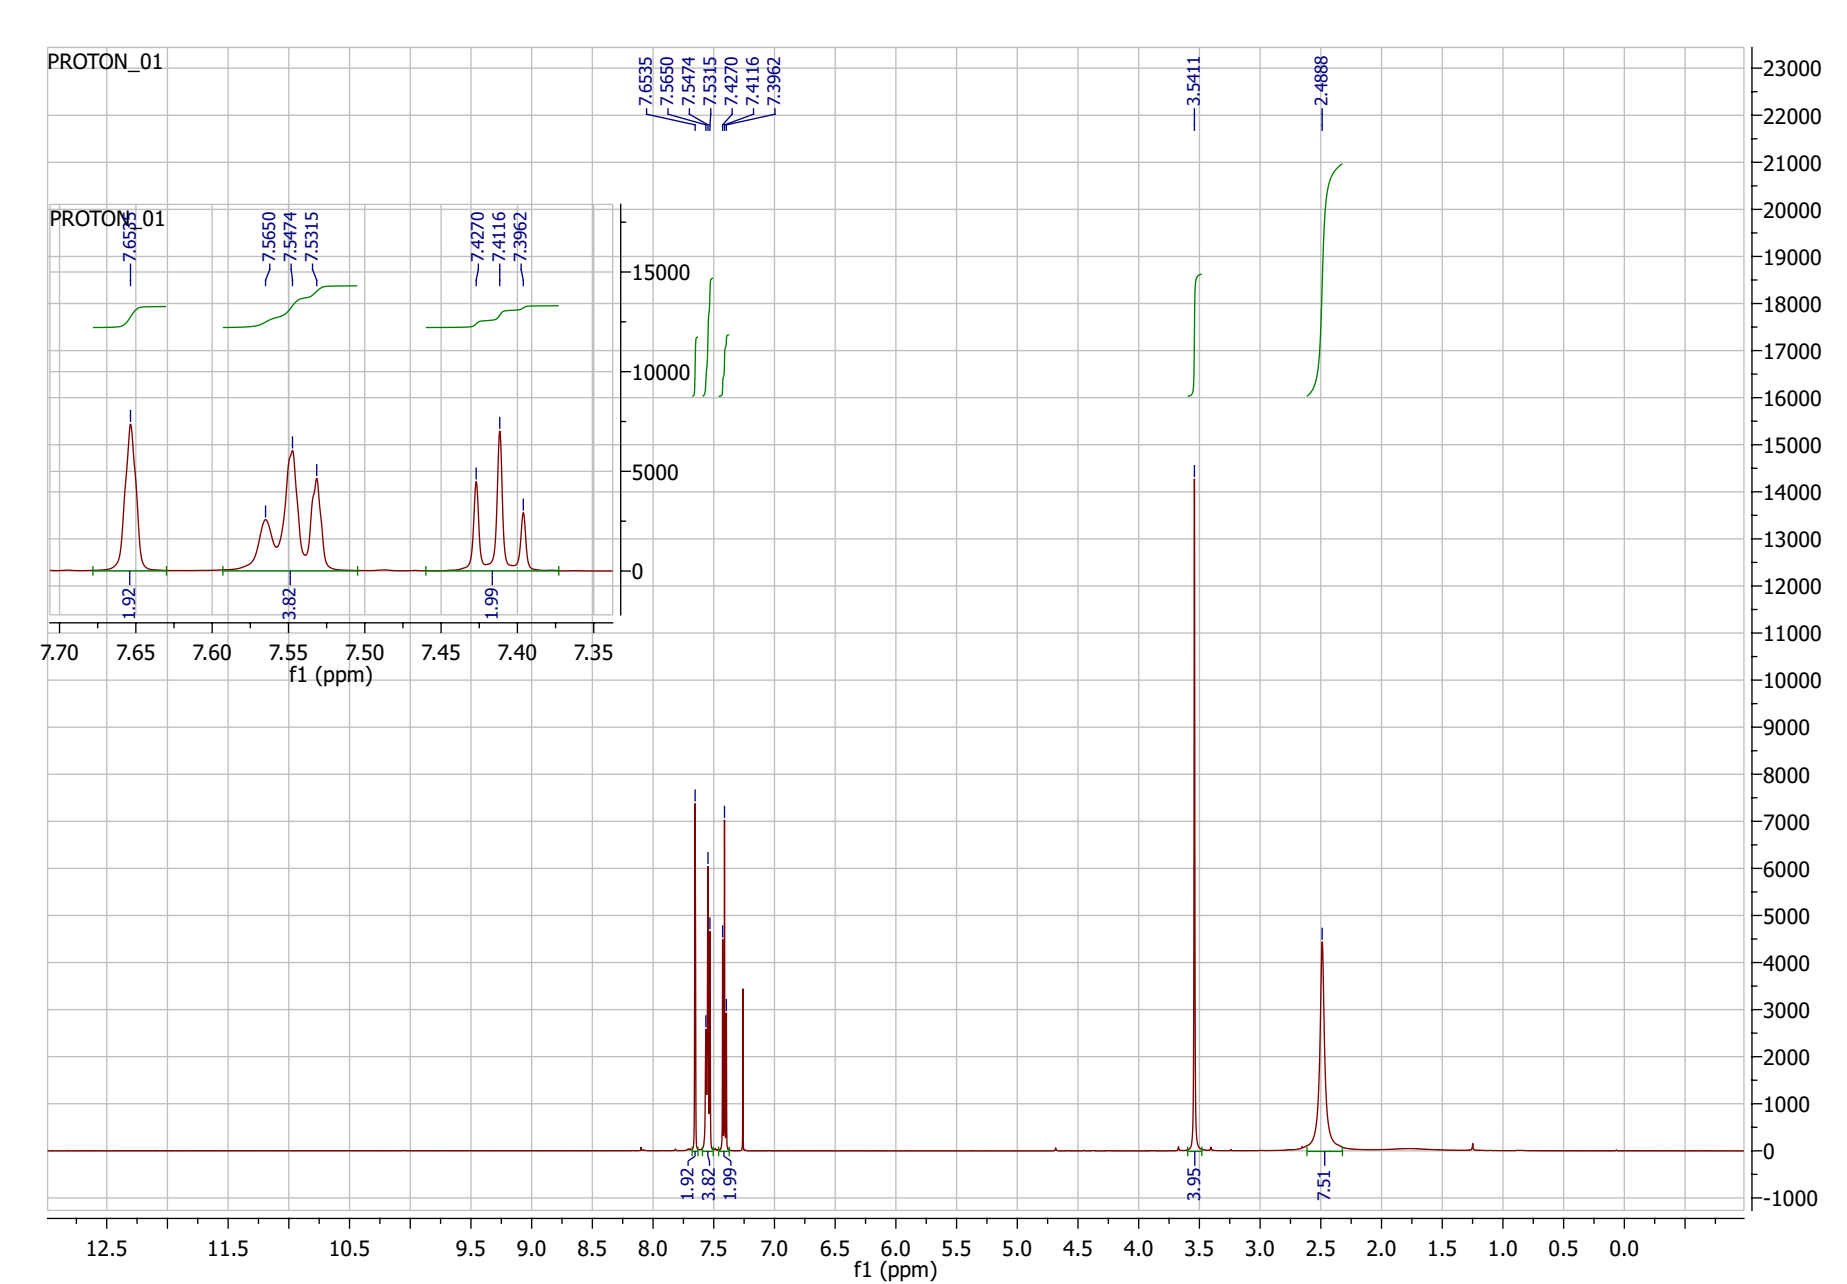


13C-NMR (125 MHz, CDCl3)


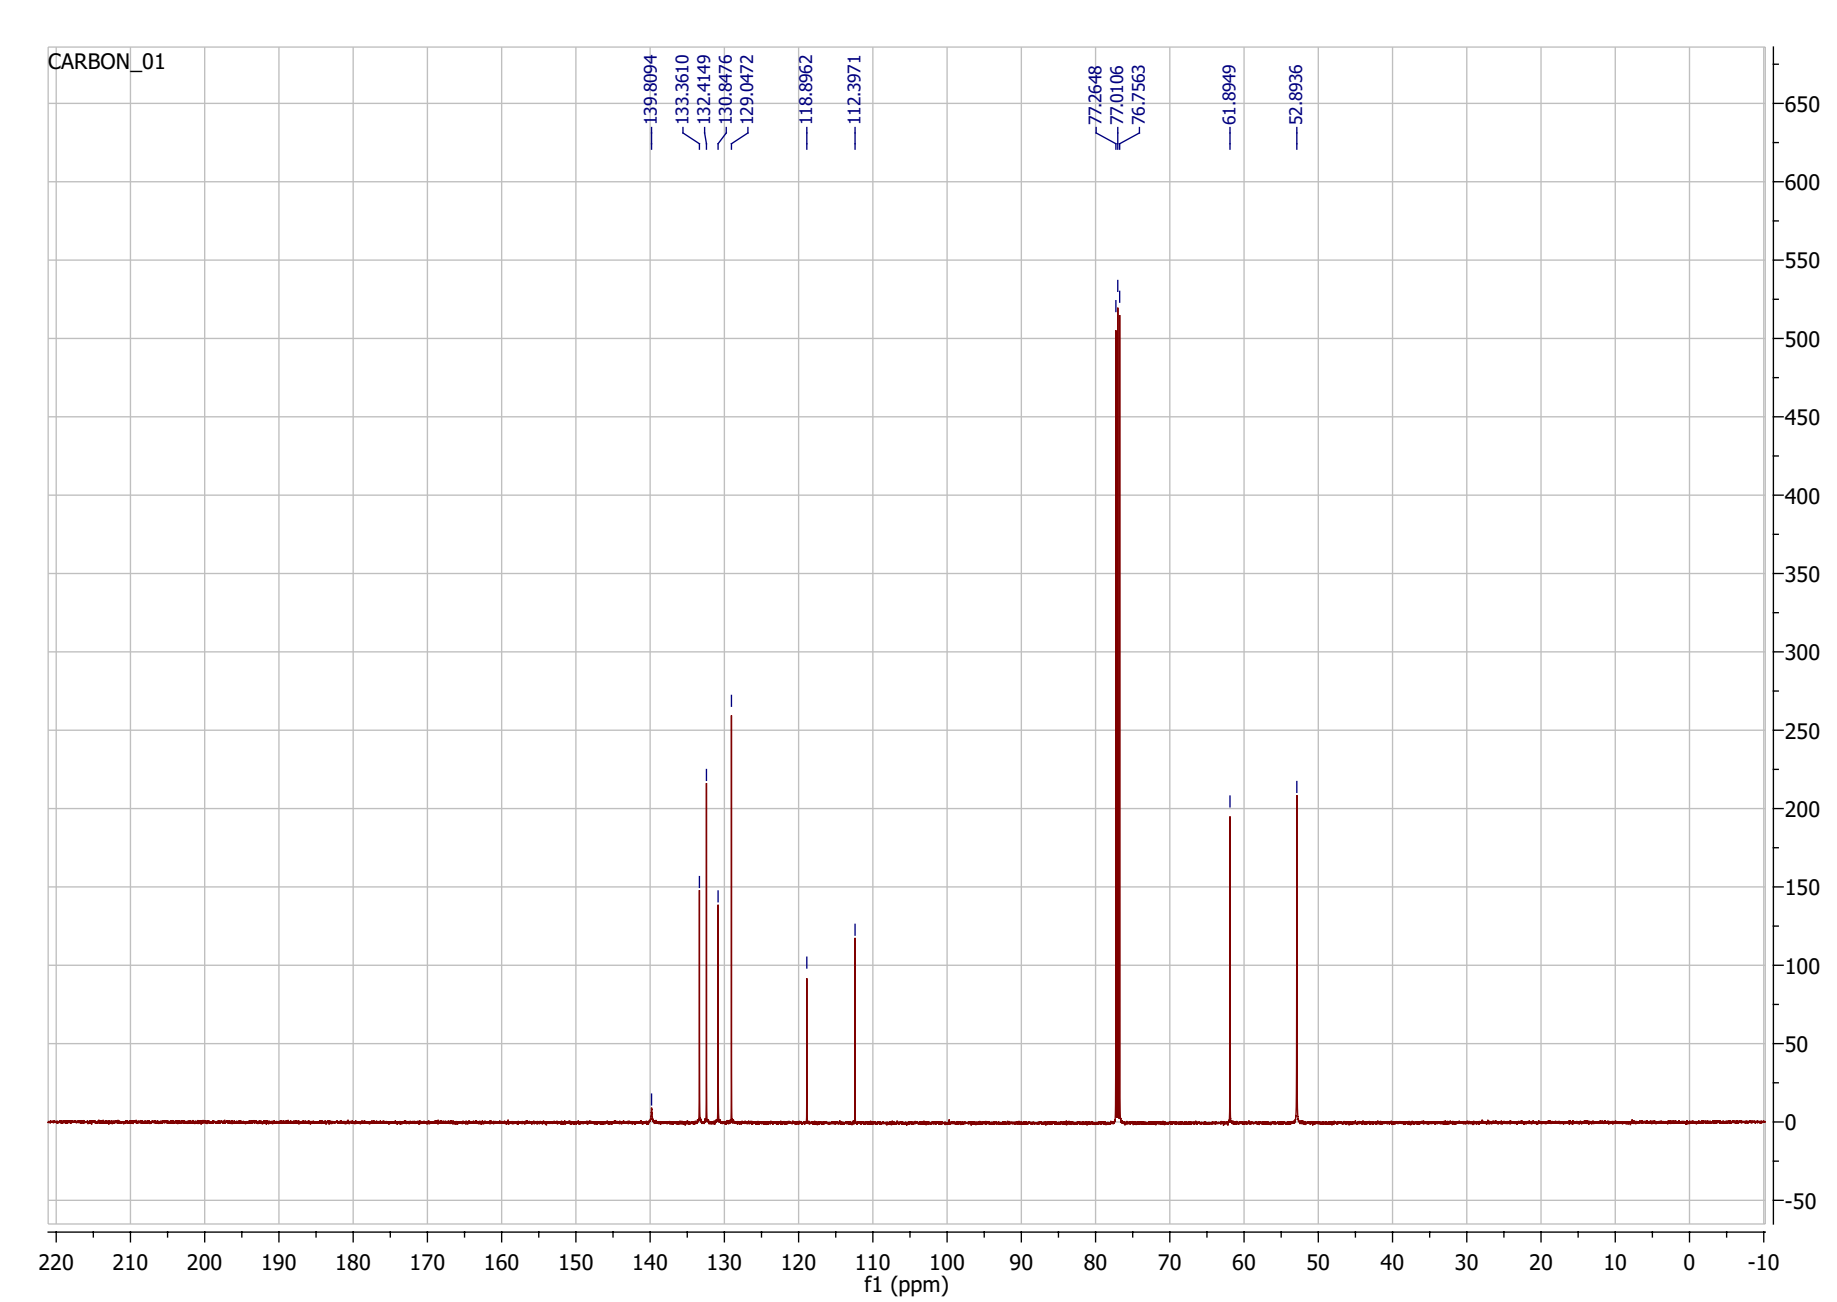


HPLC chromatogram (purity >98 %)


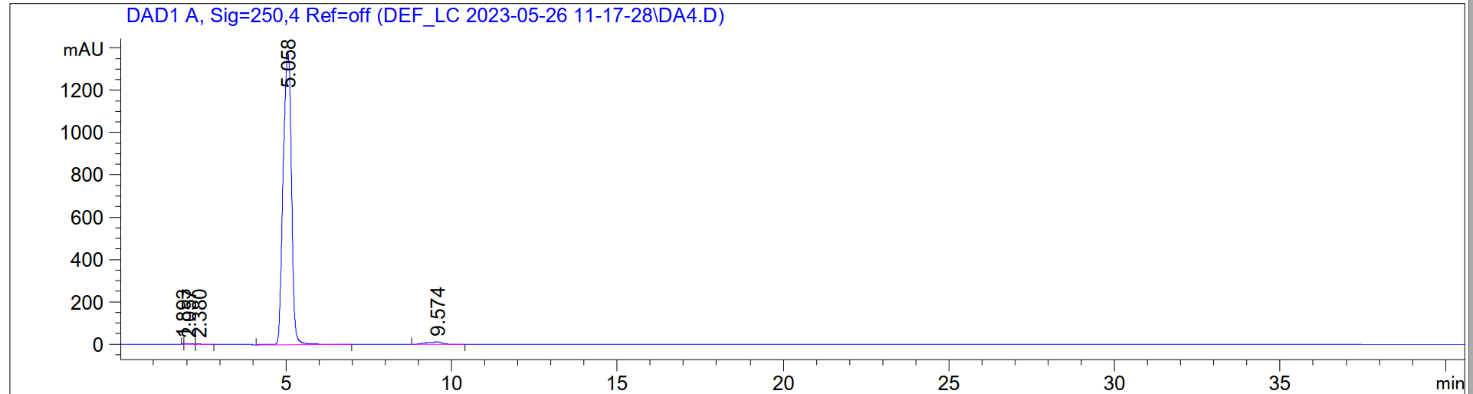


1-(3-Cyanobenzyl)-4-(3-(trifluoromethyl)benzyl)piperazine **4** (DA7)

1H-NMR (500 MHz, CDCl3)


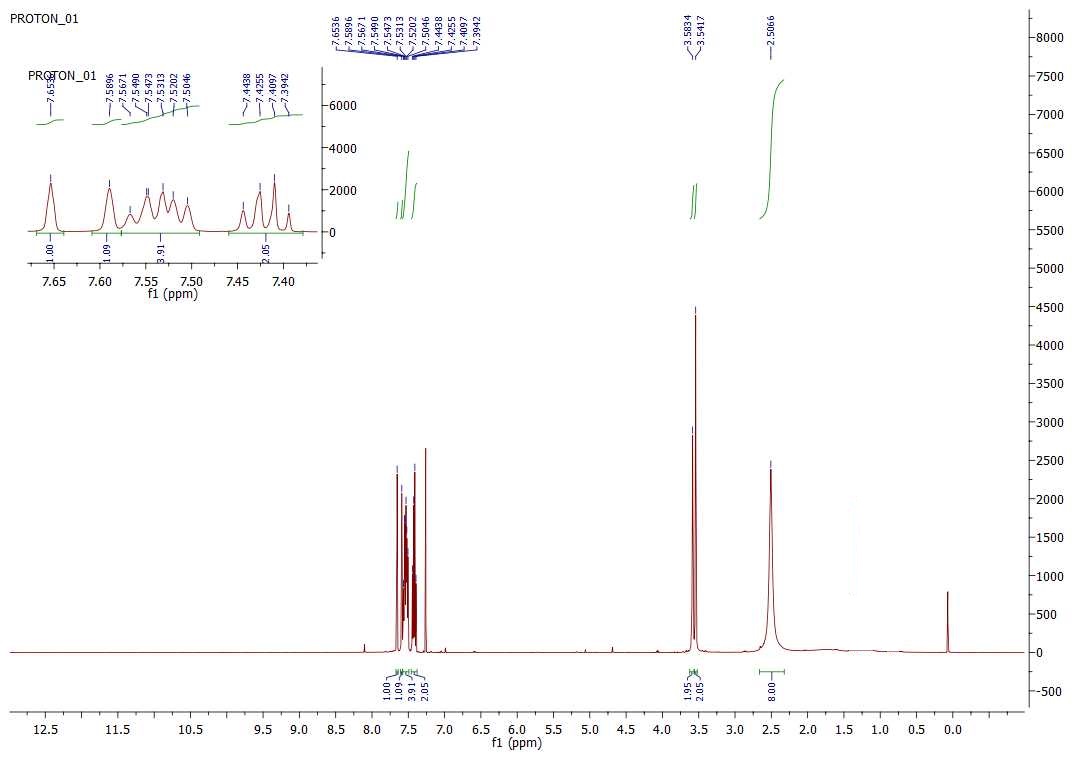


13C-NMR (125 MHz, CDCl3)


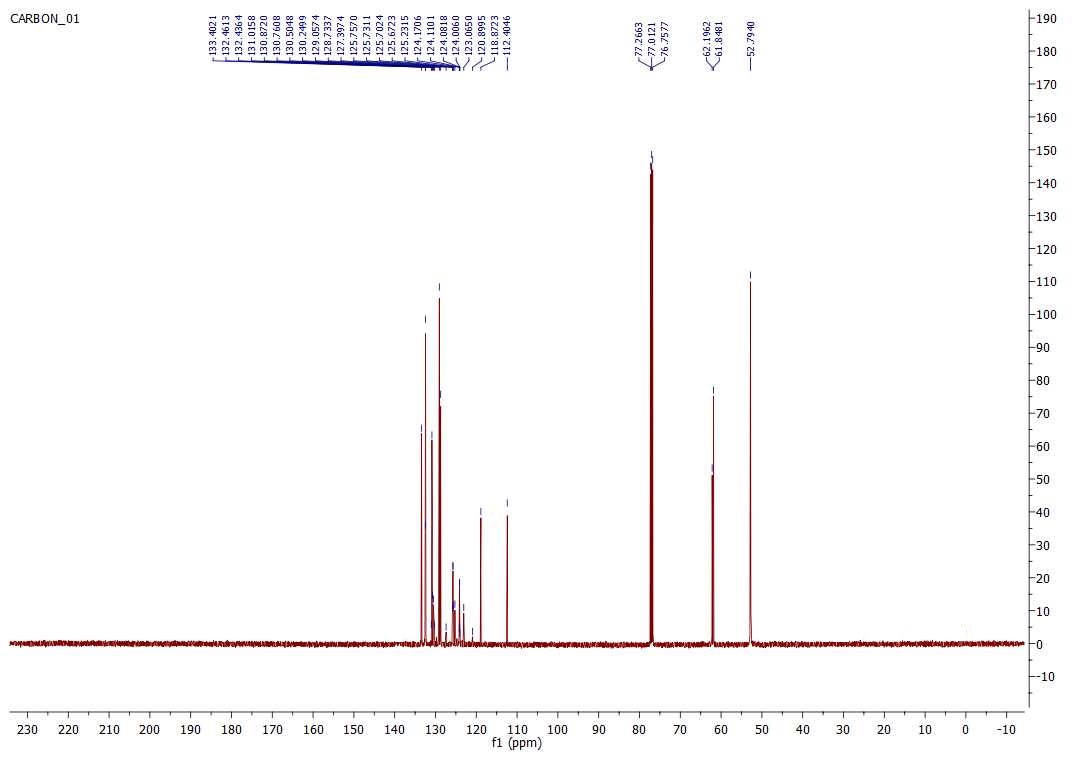


HPLC chromatogram (purity >99 %)


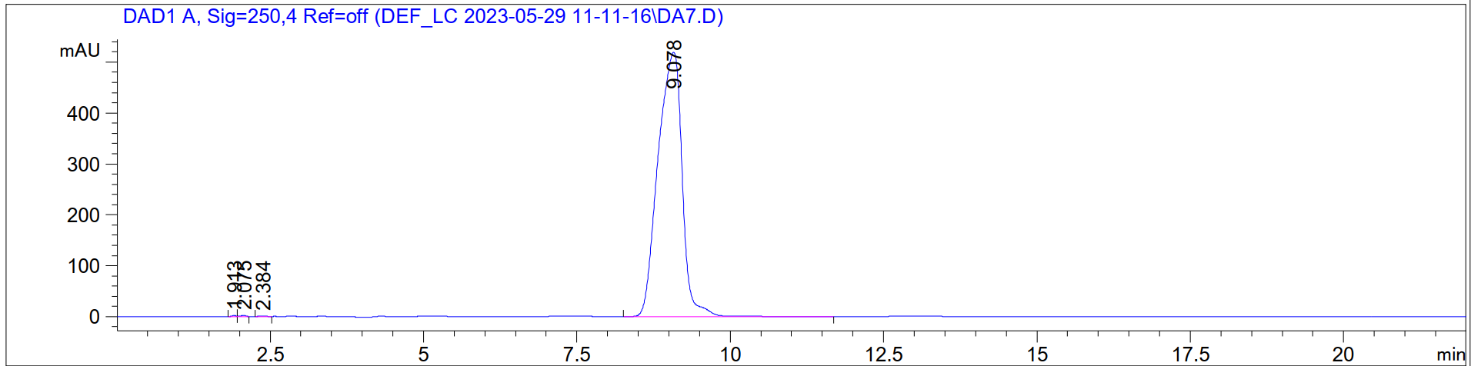


1,4-Dibenzoylpiperazine **7** (DA12)

1H-NMR (300 MHz, CDCl3)


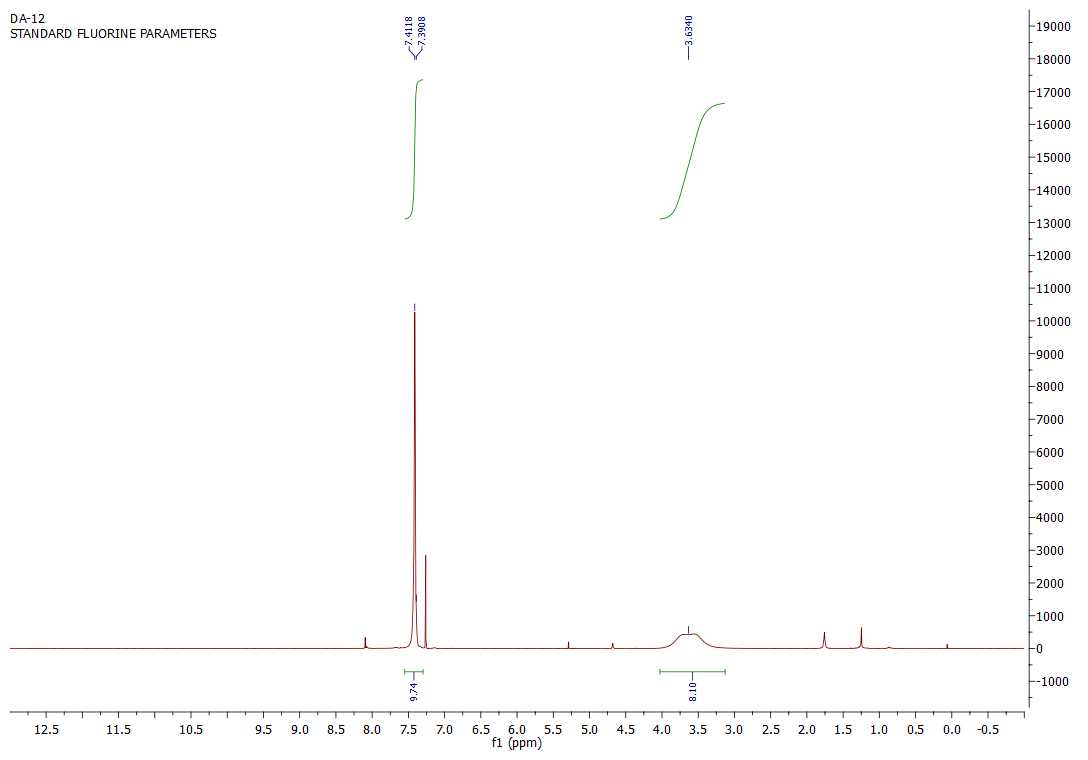


13C-NMR (125 MHz, CDCl3)


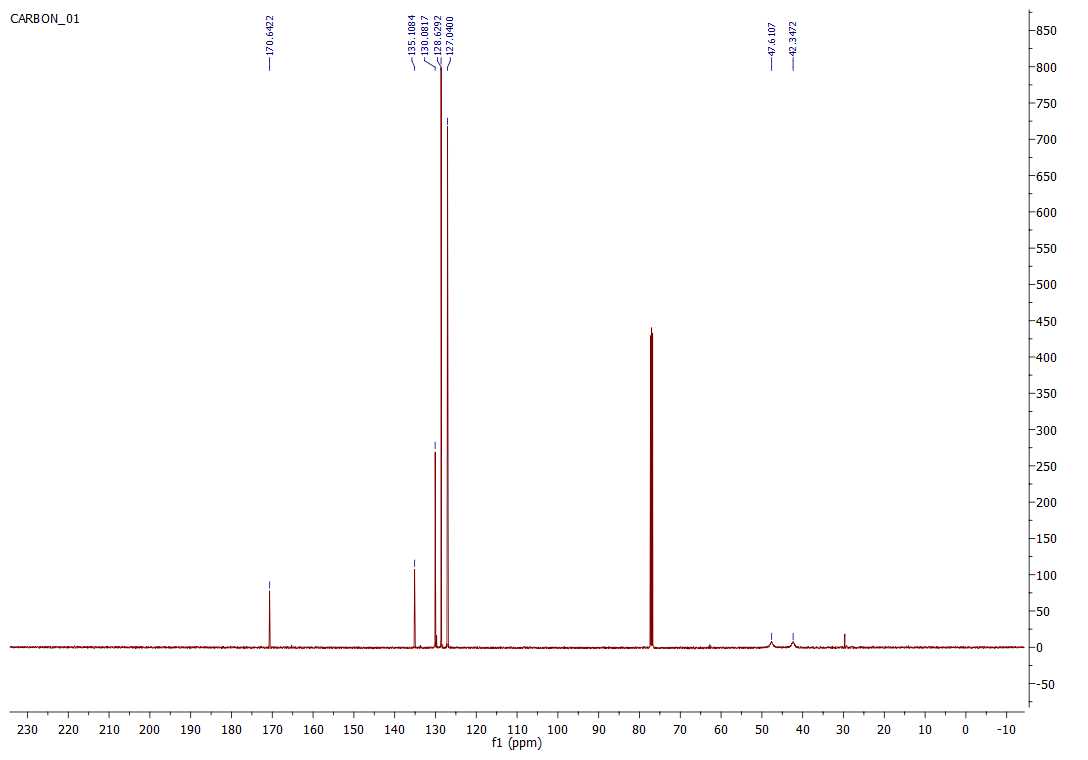


HPLC chromatogram (purity >98 %)


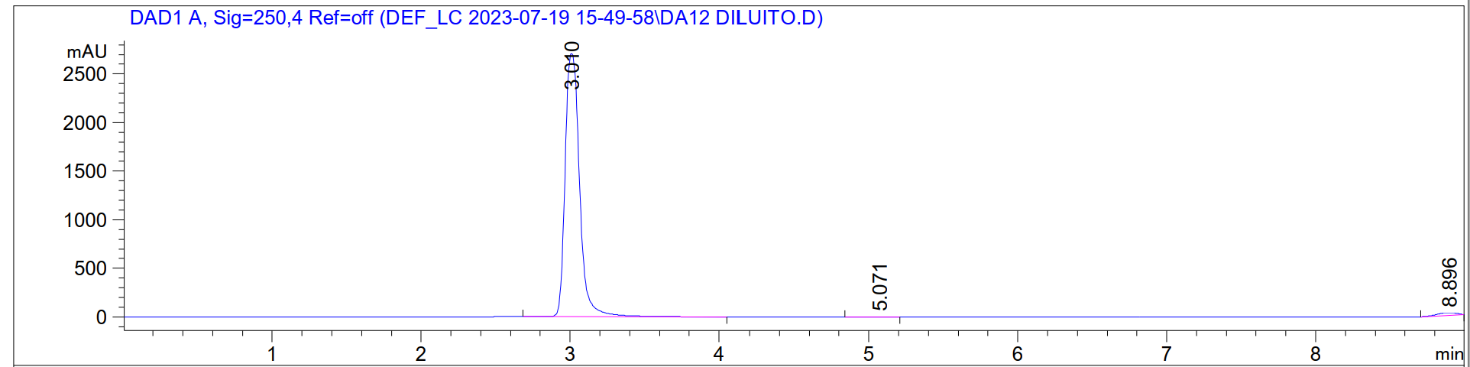


3,3'-(Piperazine-1,4-dicarbonyl)dibenzonitrile **8** (DA15)

1H-NMR (500 MHz, DMSO)


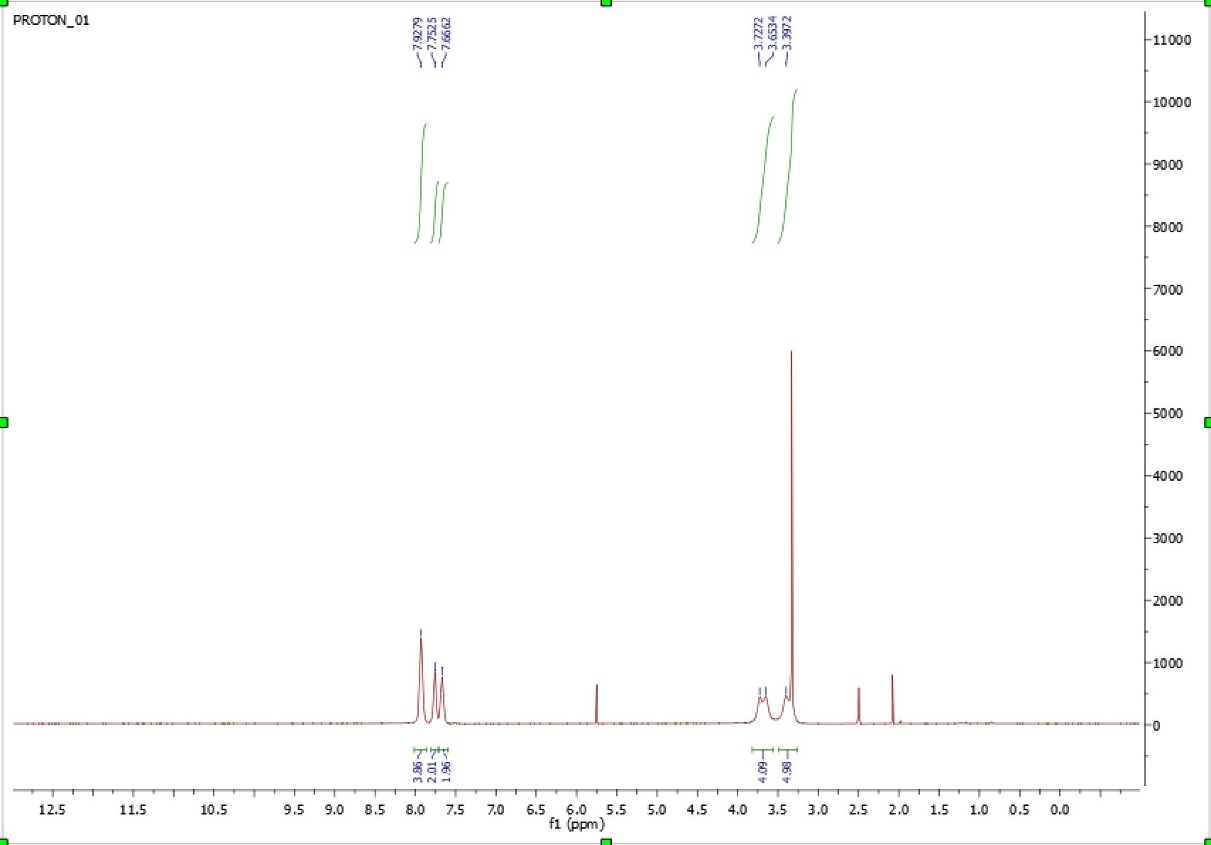


13C-NMR (125 MHz, DMSO)


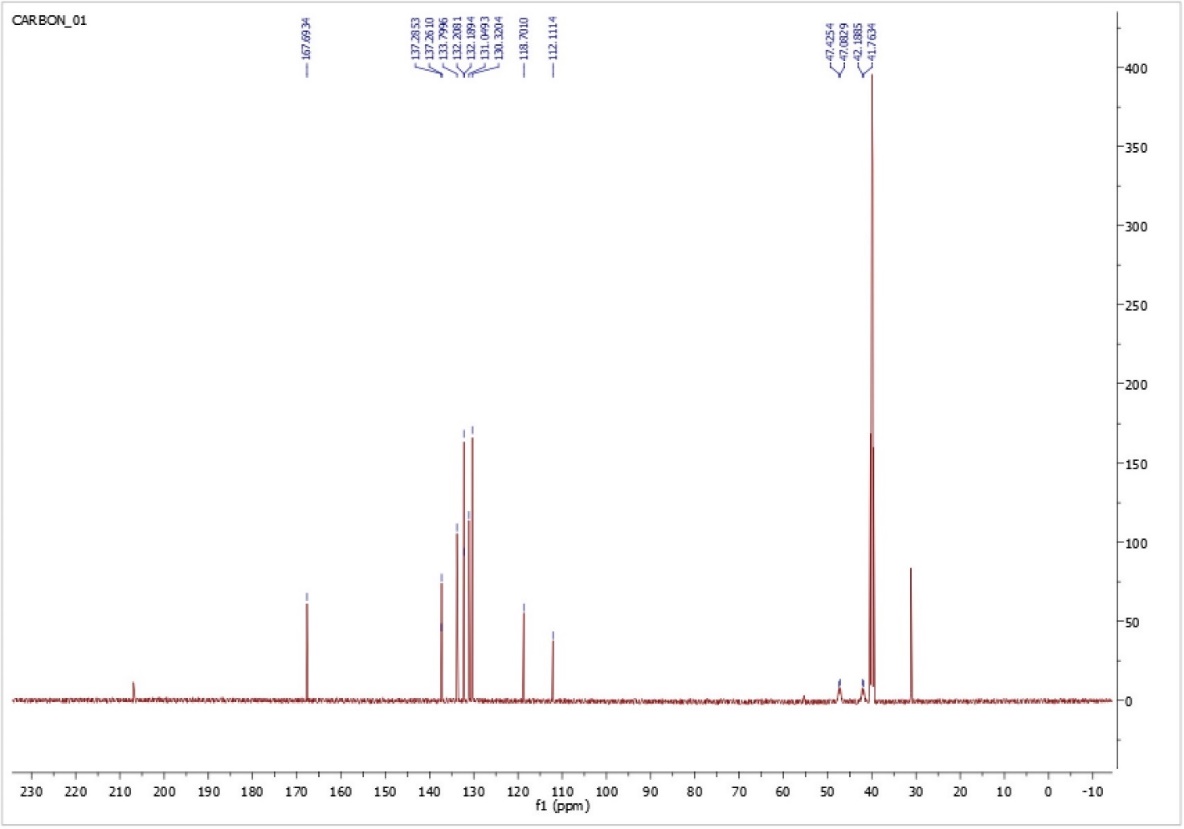


HPLC chromatogram (purity >98 %)


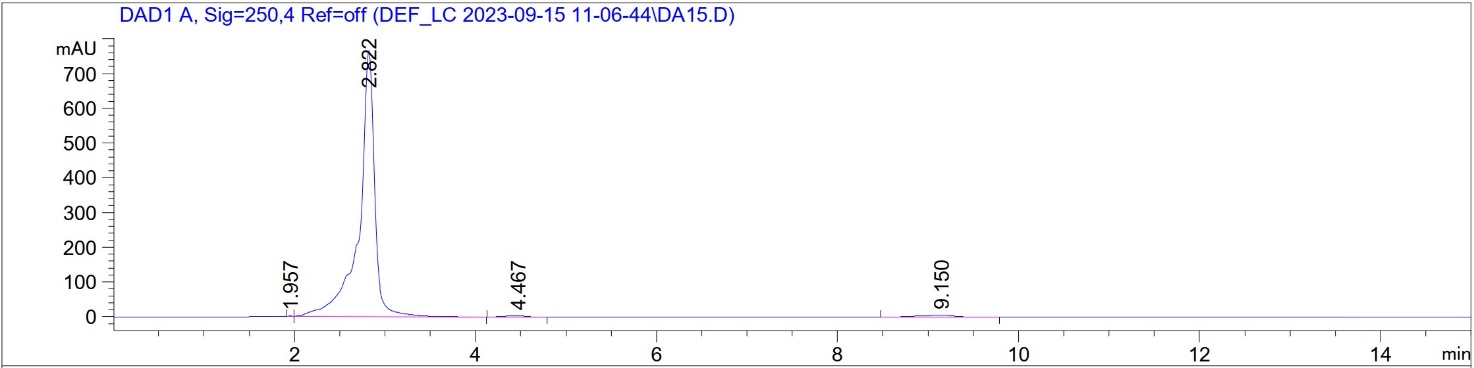


1-(3-Cyanobenzoyl)-4-(4-chlorobenzoyl)piperazine **9** (DA17)

1H-NMR (300 MHz, CDCl3)


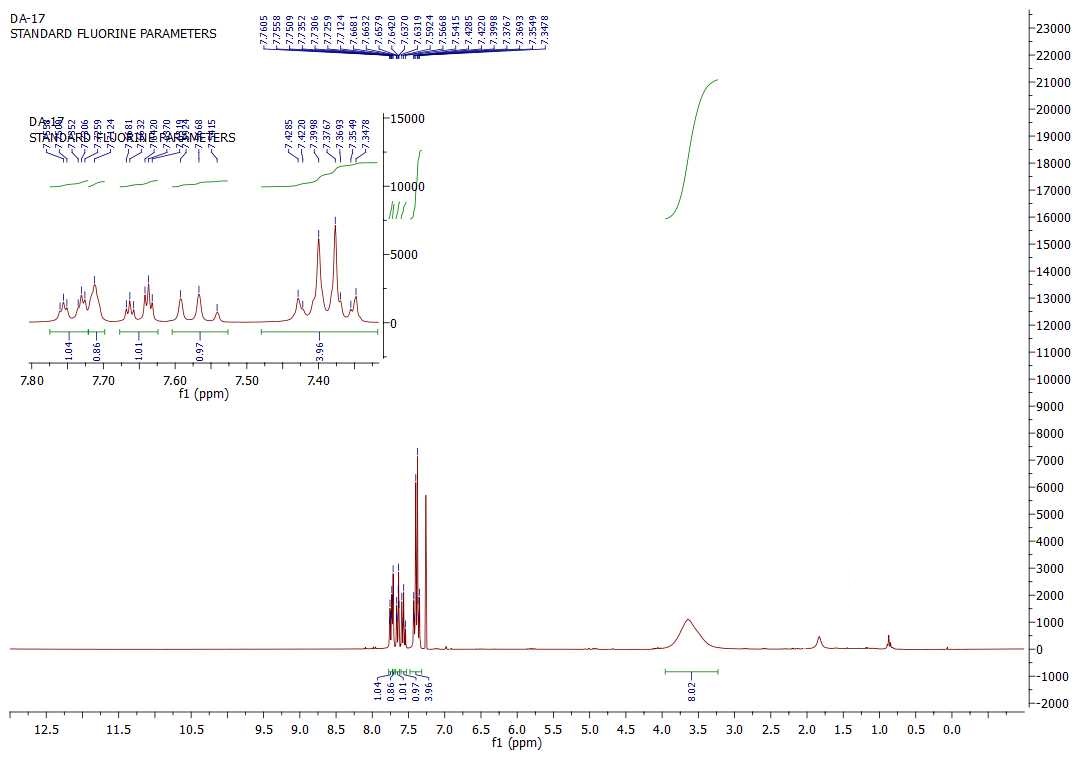


13C-NMR (125 MHz, CDCl3)


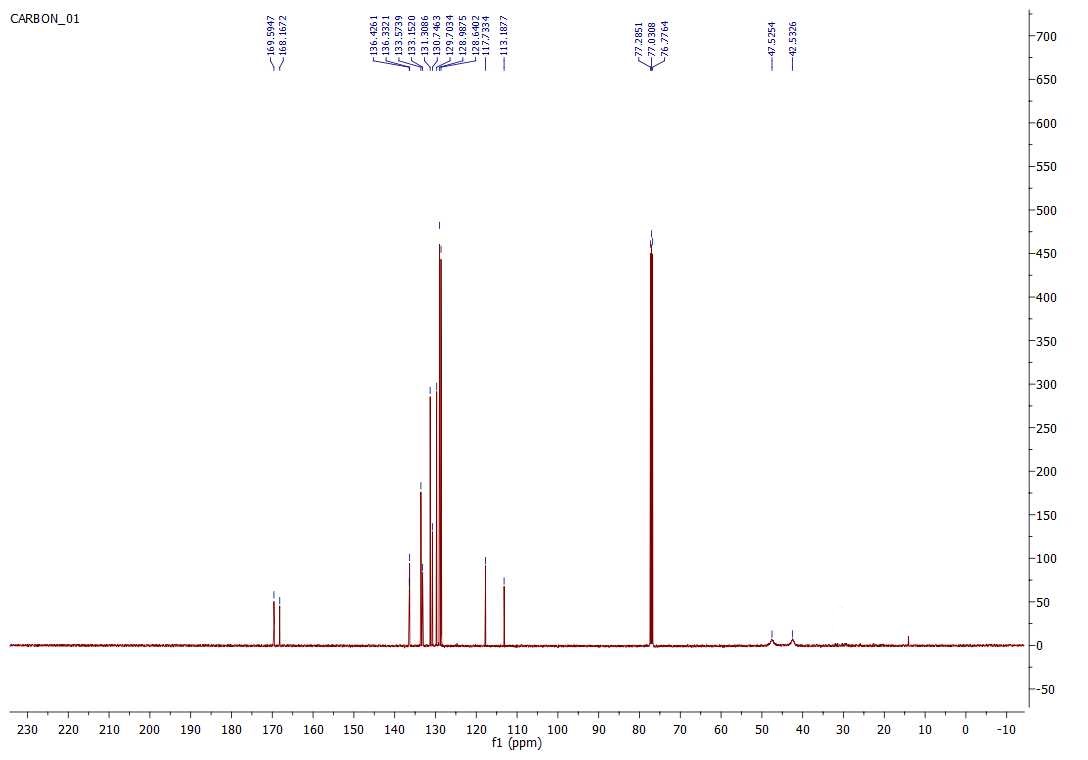


HPLC chromatogram (purity >99 %)


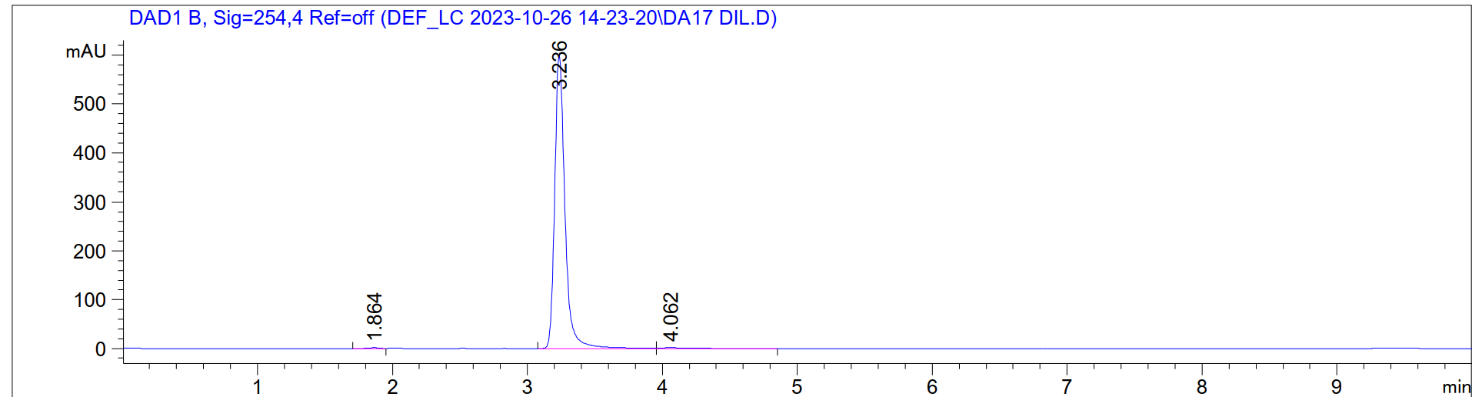


3,3'-((2-Oxopiperazine-1,4-diyl)bis(methylene))dibenzonitrile **10** (DA9)

1H-NMR (500 MHz, CD3OD)


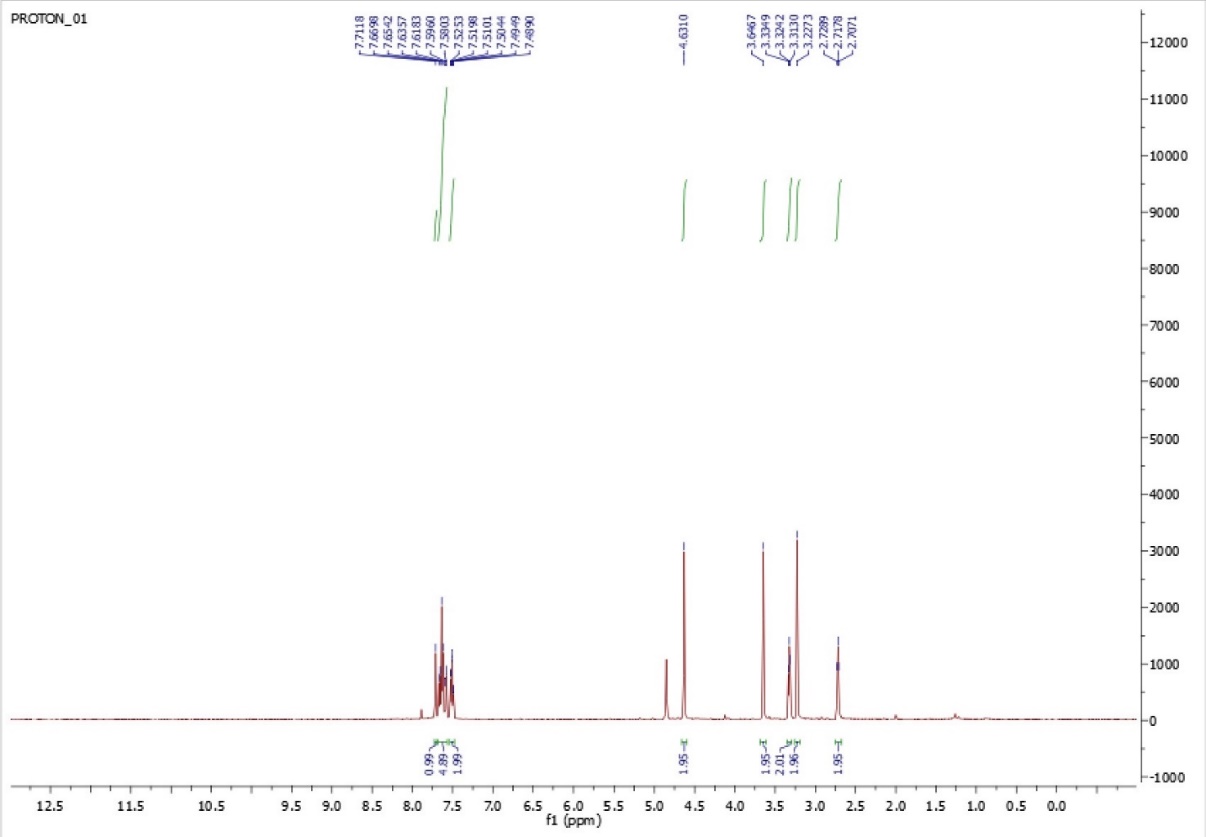


13C-NMR (125 MHz, CD3OD)


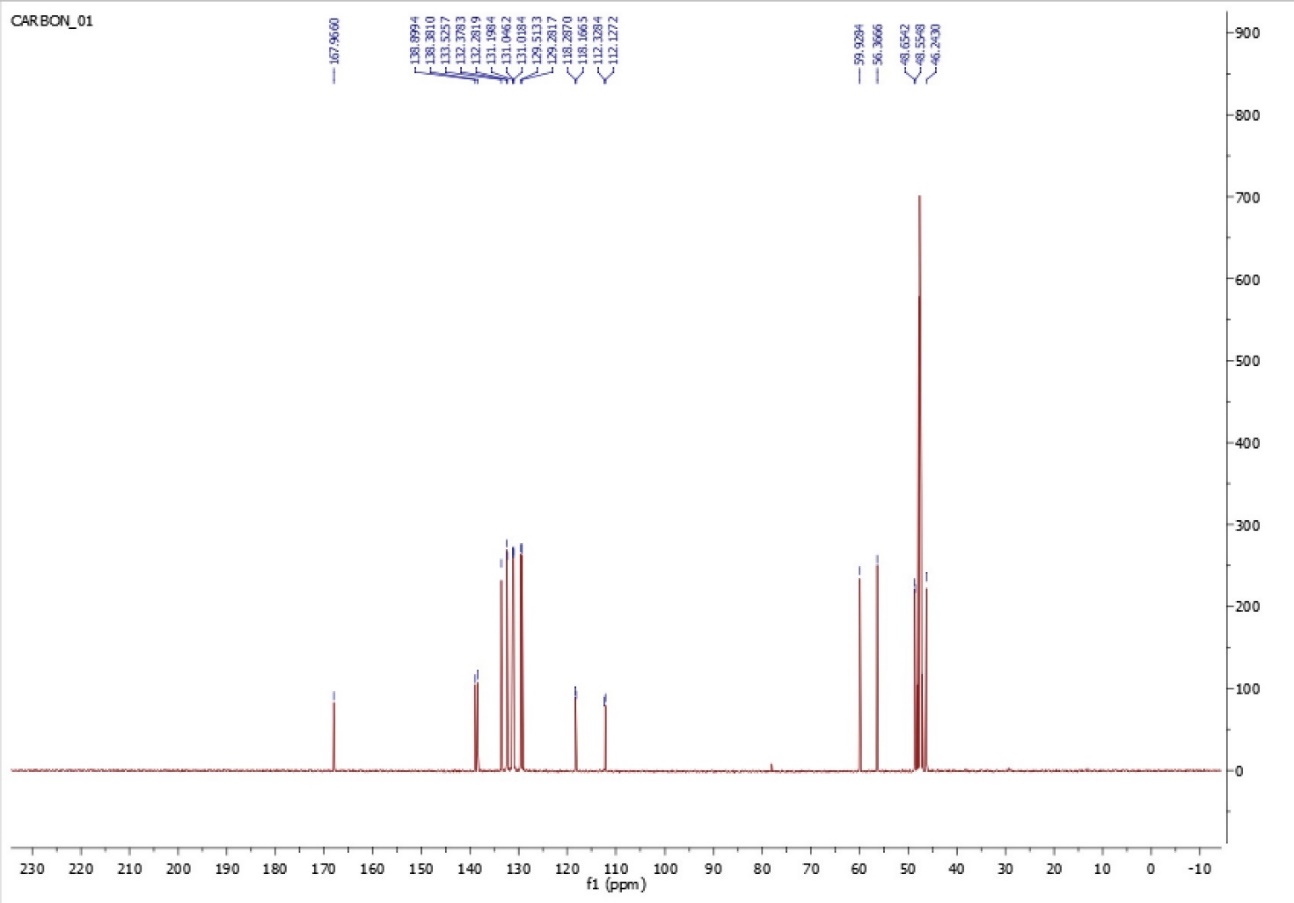


HPLC chromatogram (purity >99 %)


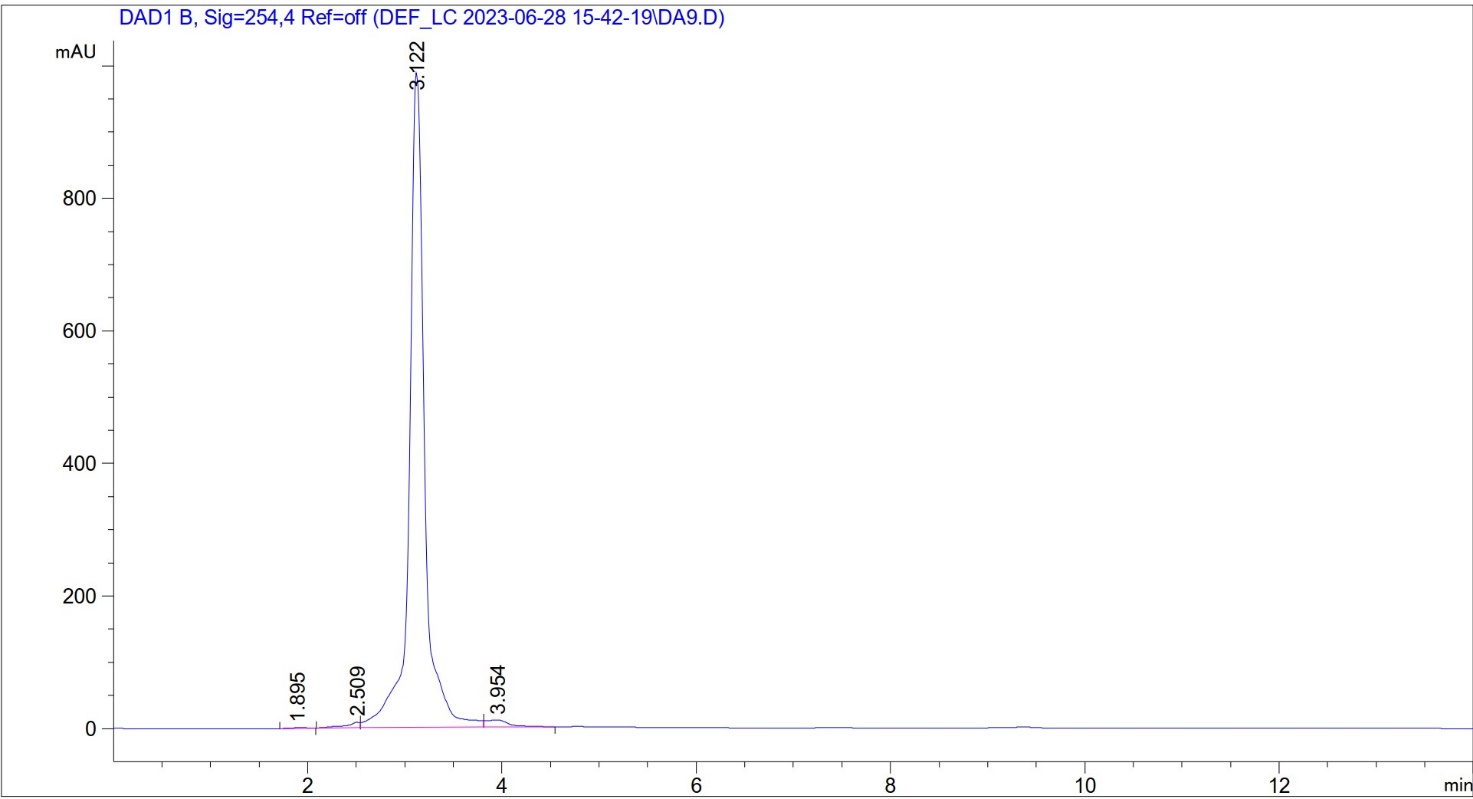


1,4-Bis(3-(Trifluoromethyl)benzyl)piperazin-2-one **11** (DA24)

1H-NMR (300 MHz, CDCl3)


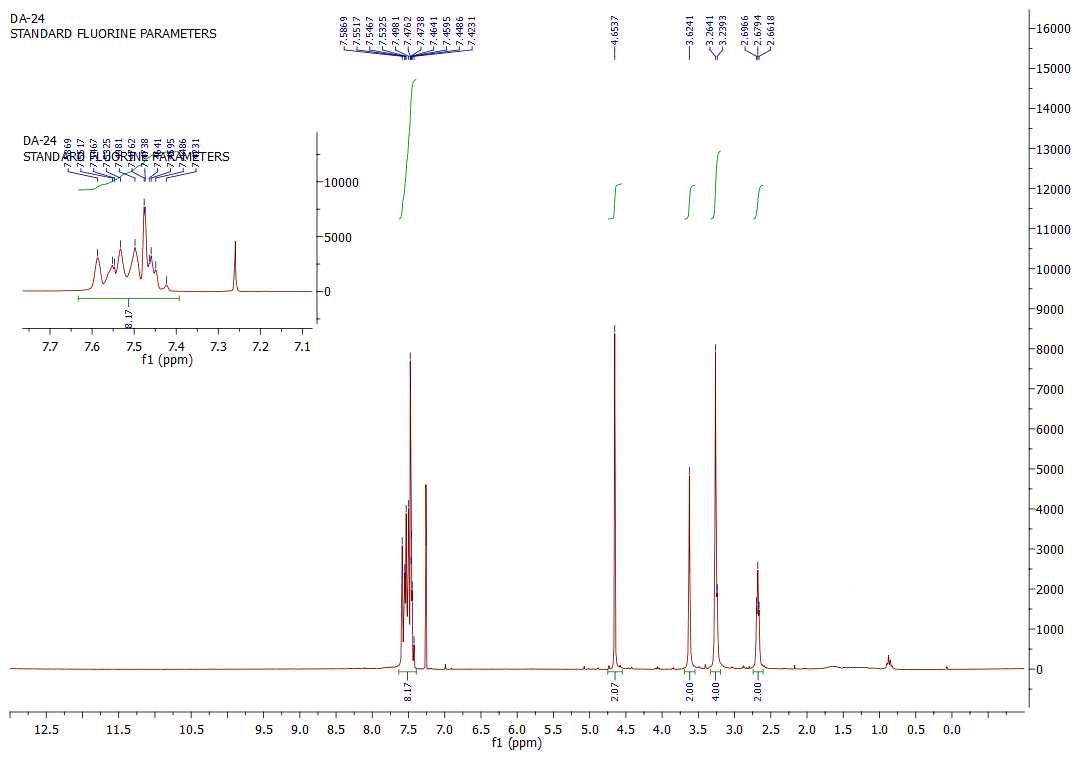


13C-NMR (125 MHz, CD3OD)


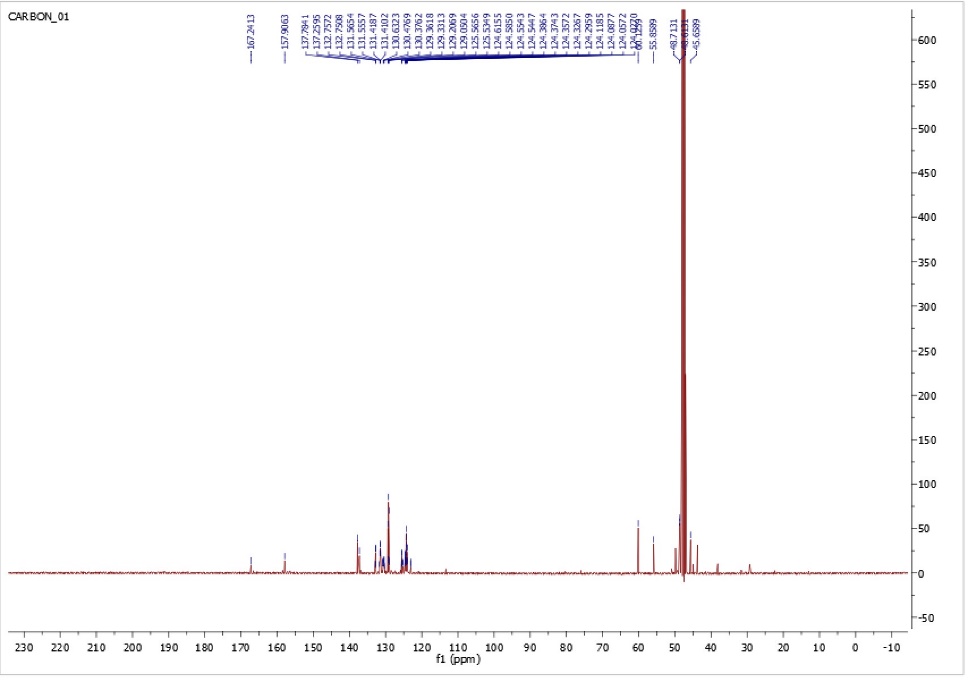


HPLC chromatogram (purity >97 %)


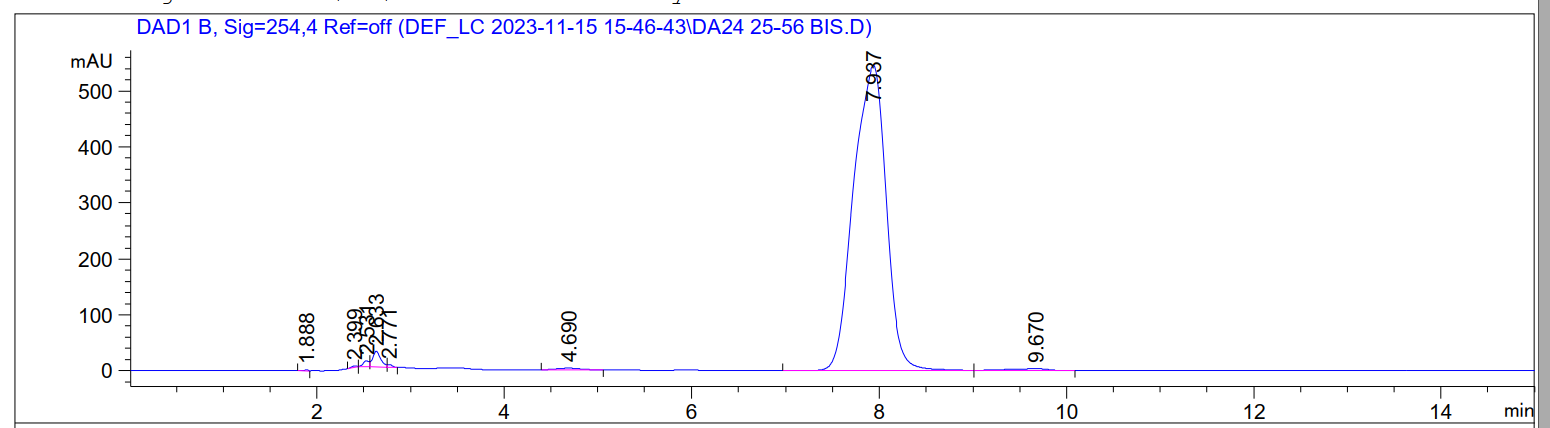


1,4-Bis(2-fluorobenzyl)piperazin-2-one **12** (DA32)

1H-NMR (500 MHz, CDCl3)


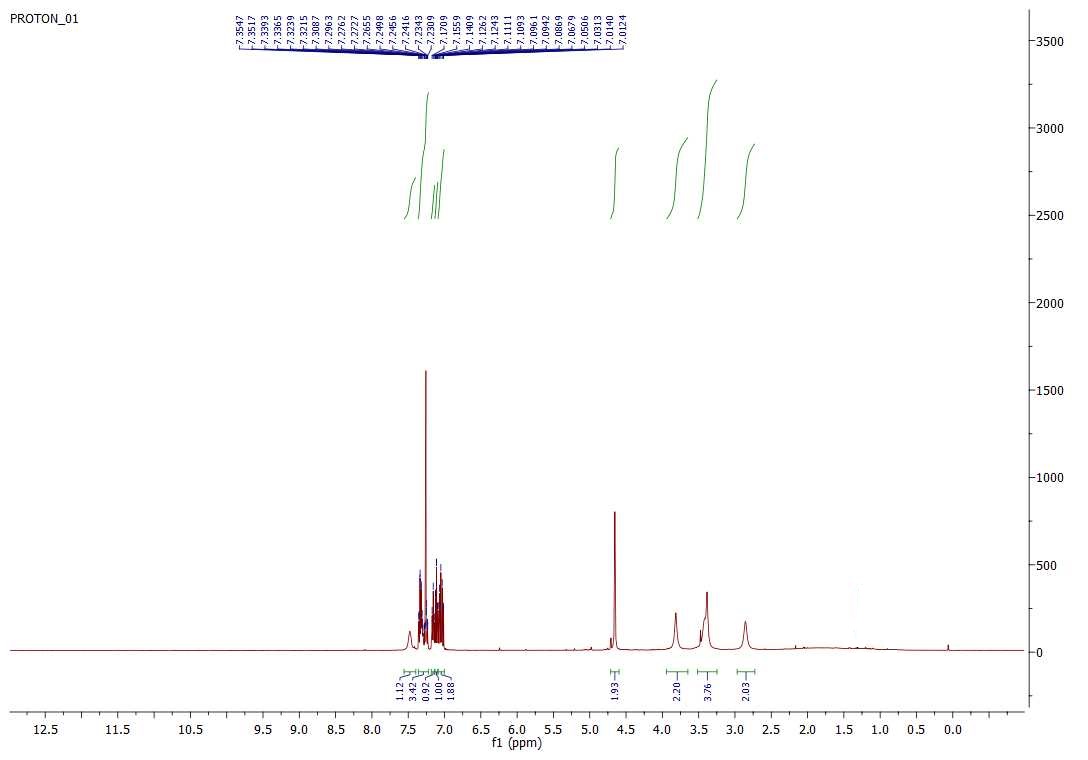


13C-NMR (125 MHz, CDCl3)


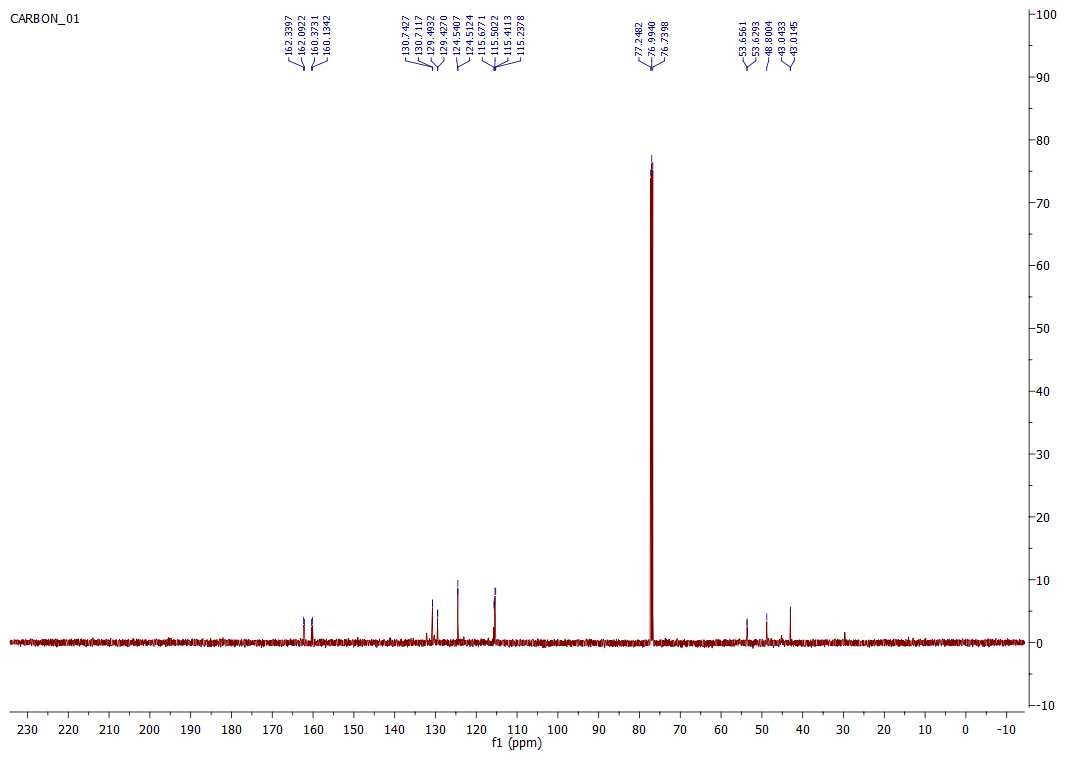


HPLC chromatogram (purity >96 %)
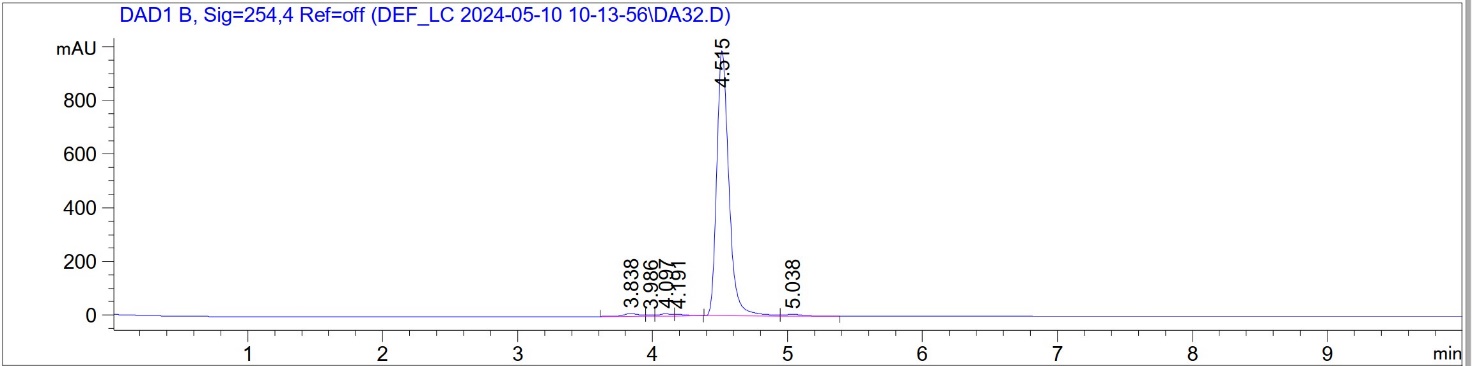


1,4-Bis(4-fluorobenzyl)piperazin-2-one **13** (DA36)

1H-NMR (500 MHz, CDCl3)


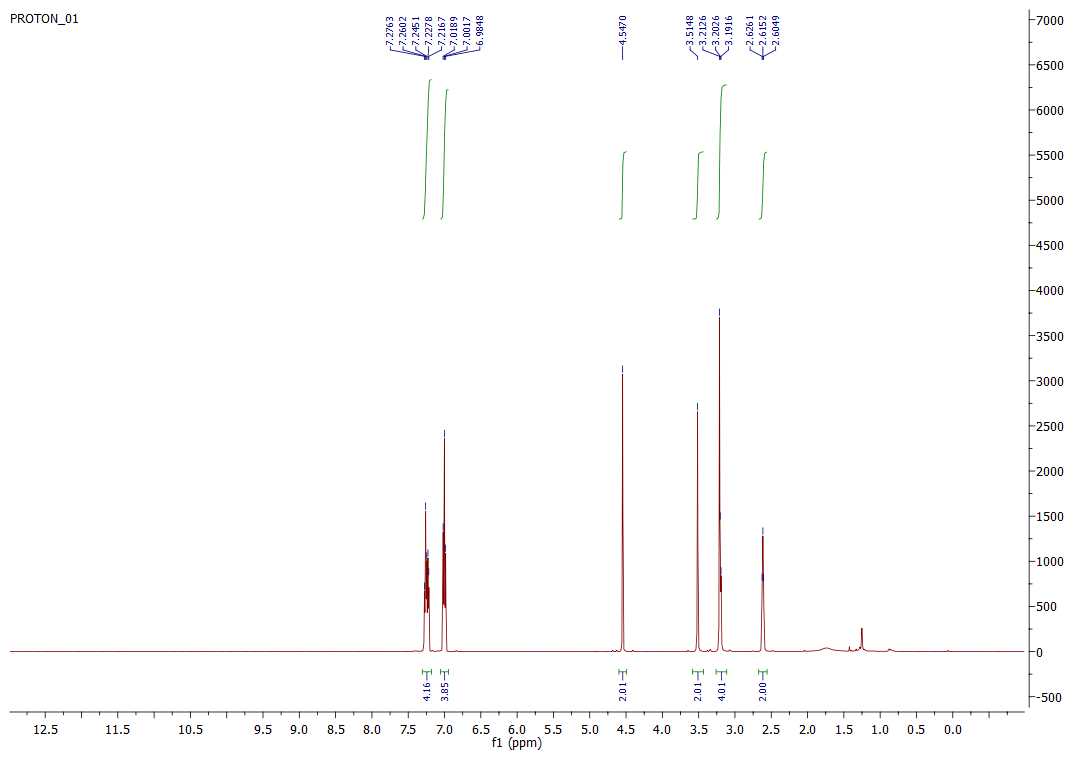


13C-NMR (125 MHz, CDCl3)


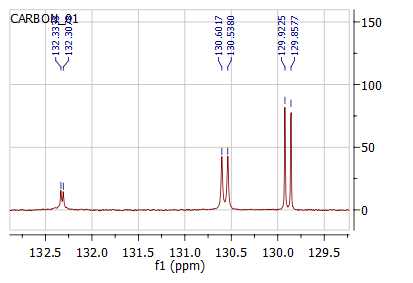

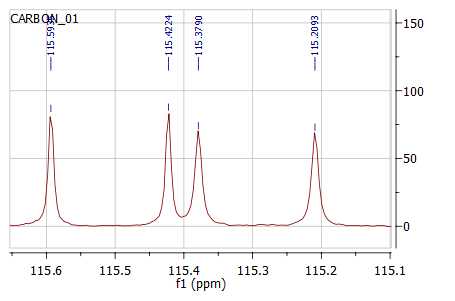

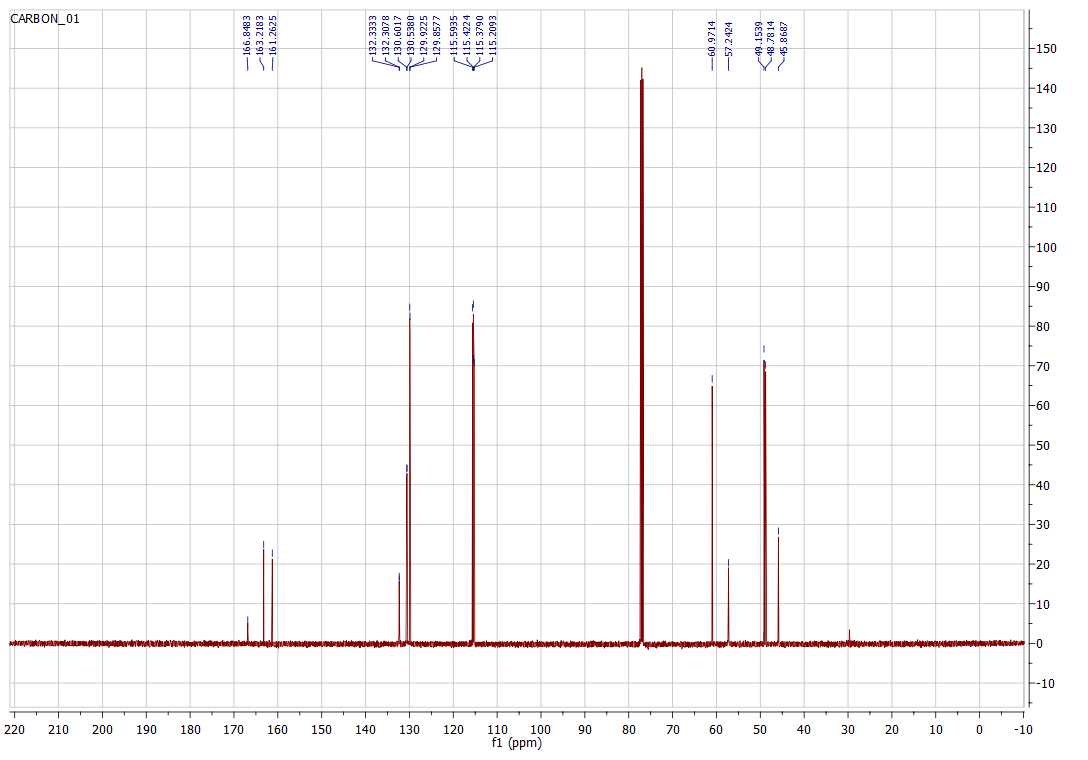


HPLC chromatogram (purity >97 %)


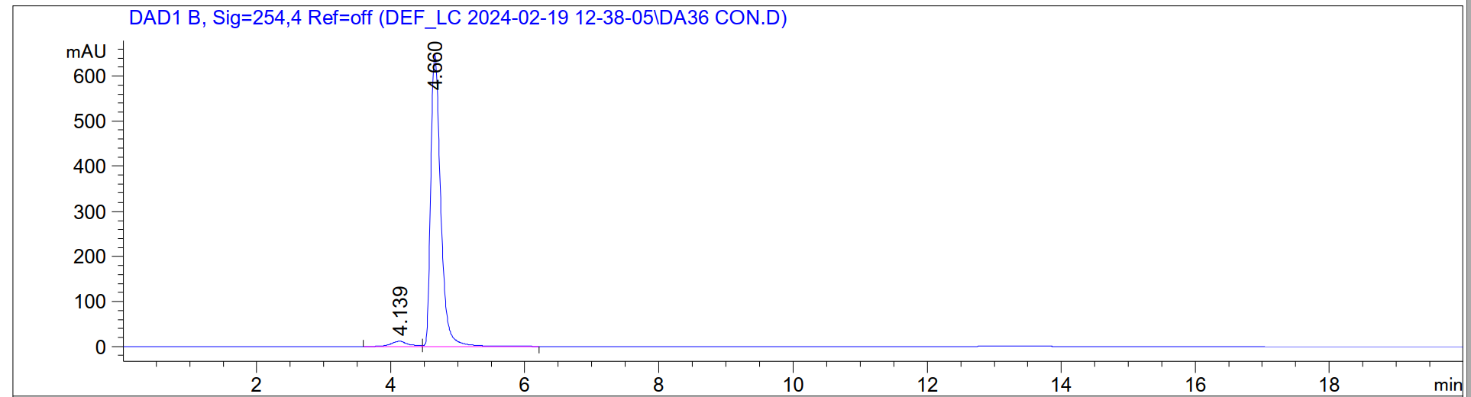


1,4-Bis(2-bromobenzyl)piperazin-2-one hydrochloride **14** (DA33)

1H-NMR (500 MHz, CD3OD)


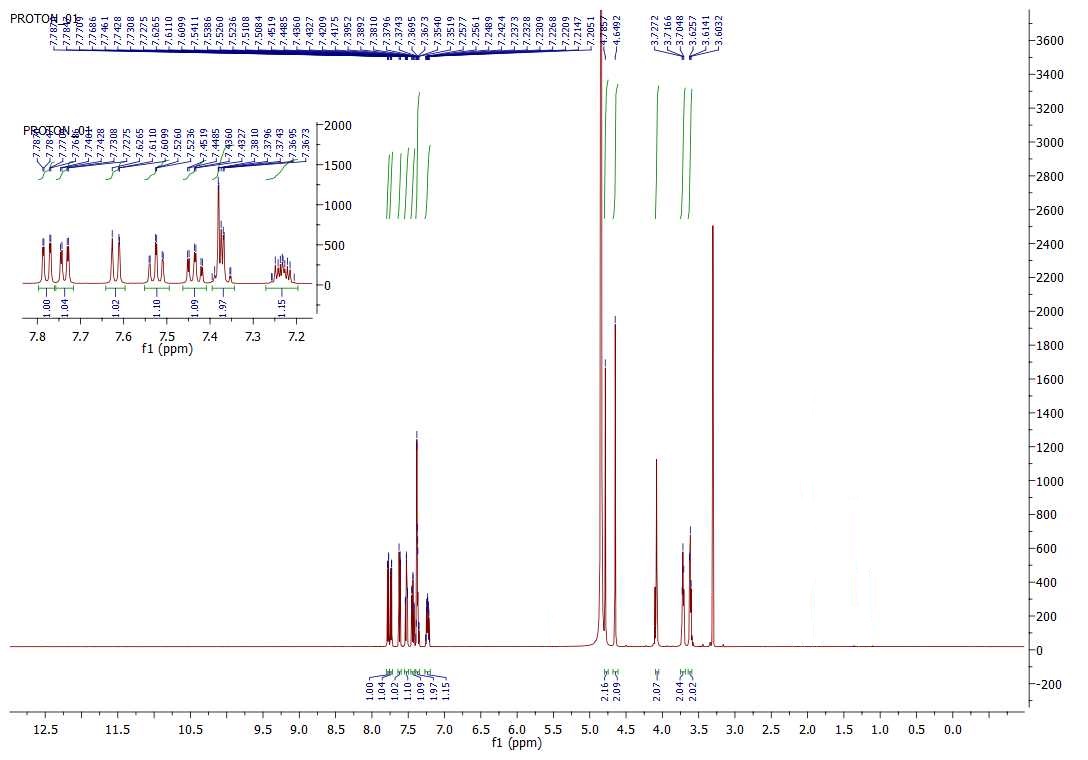


13C-NMR (125 MHz, CD3OD)
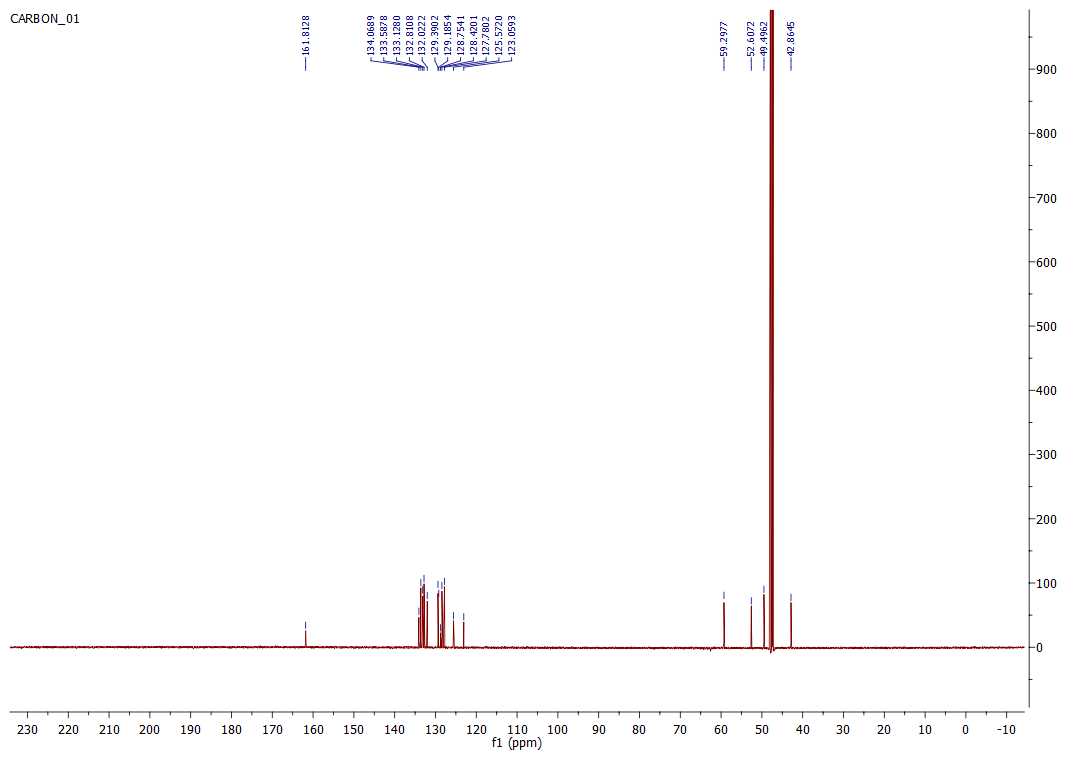


HPLC chromatogram (purity >99 %)

**
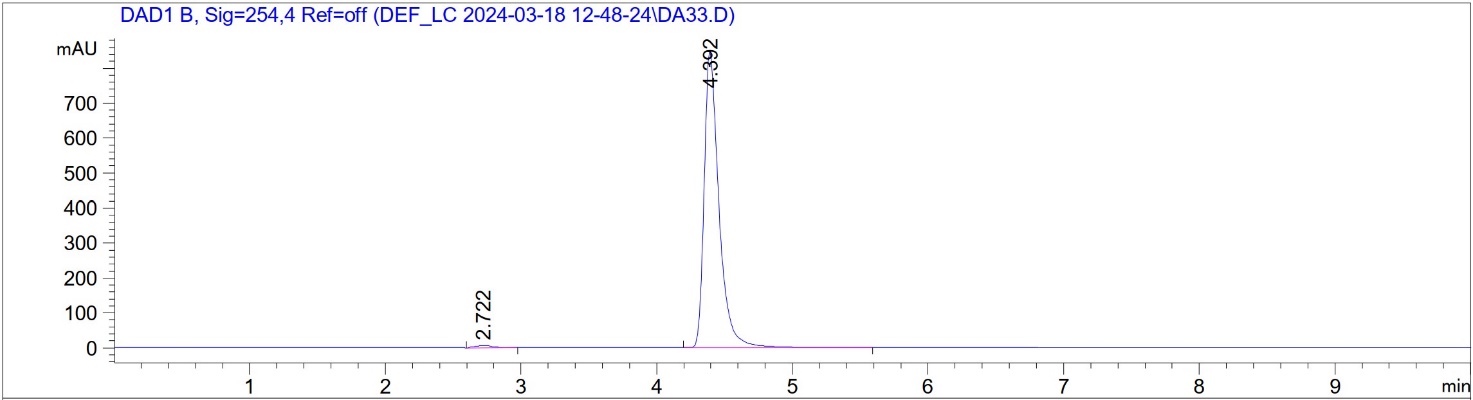
**

1,4-Bis(4-bromobenzyl)piperazin-2-one **15** (DA35)

1H-NMR (500 MHz, CDCl3)


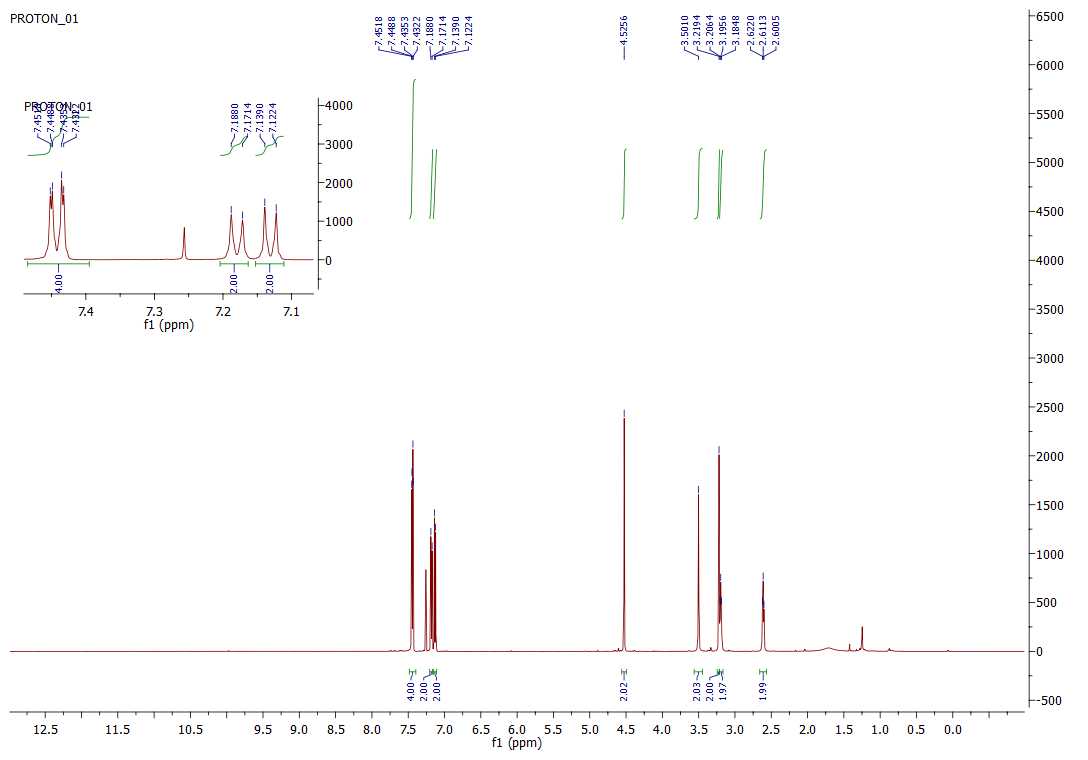


13C-NMR (125 MHz, CDCl3)


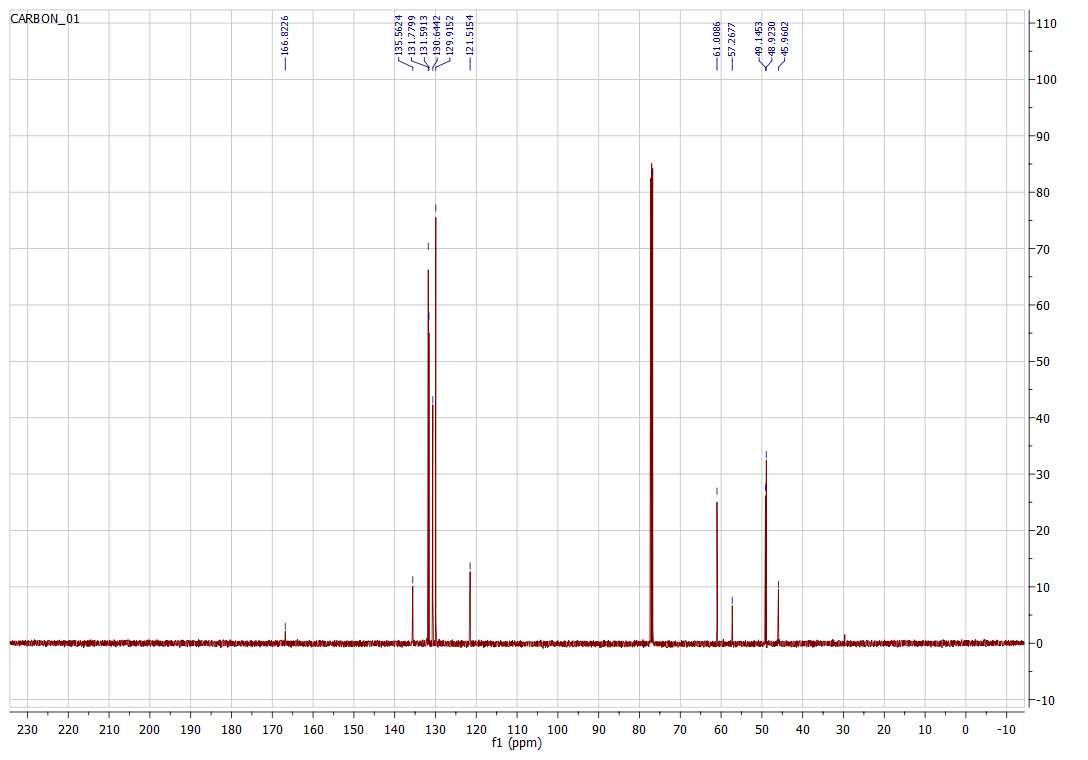


HPLC chromatogram (purity >98 %)


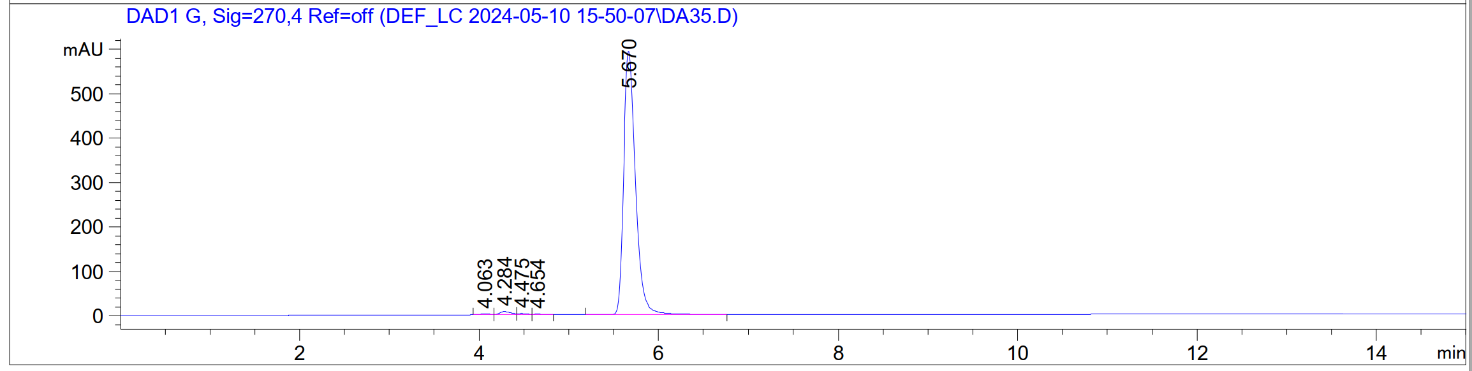


1,4-Bis(4-chlorobenzyl)piperazin-2-one **16** (DA53)

1H-NMR (500 MHz, CDCl3)


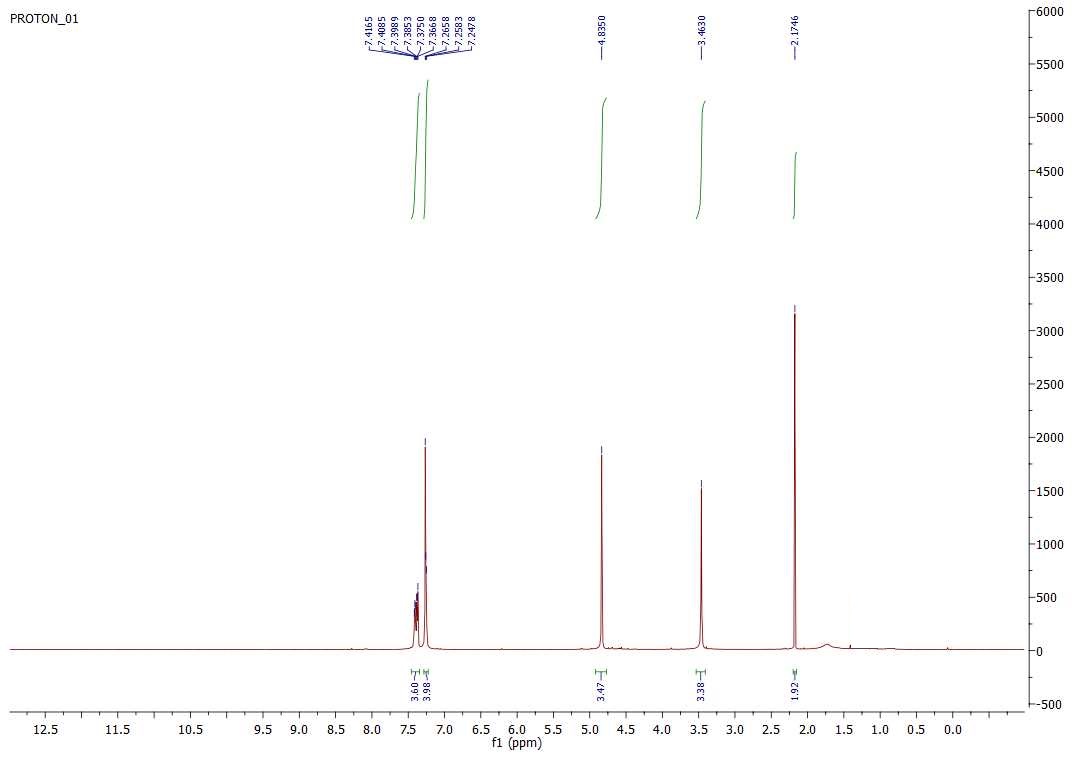


13C-NMR (125 MHz, CDCl3)


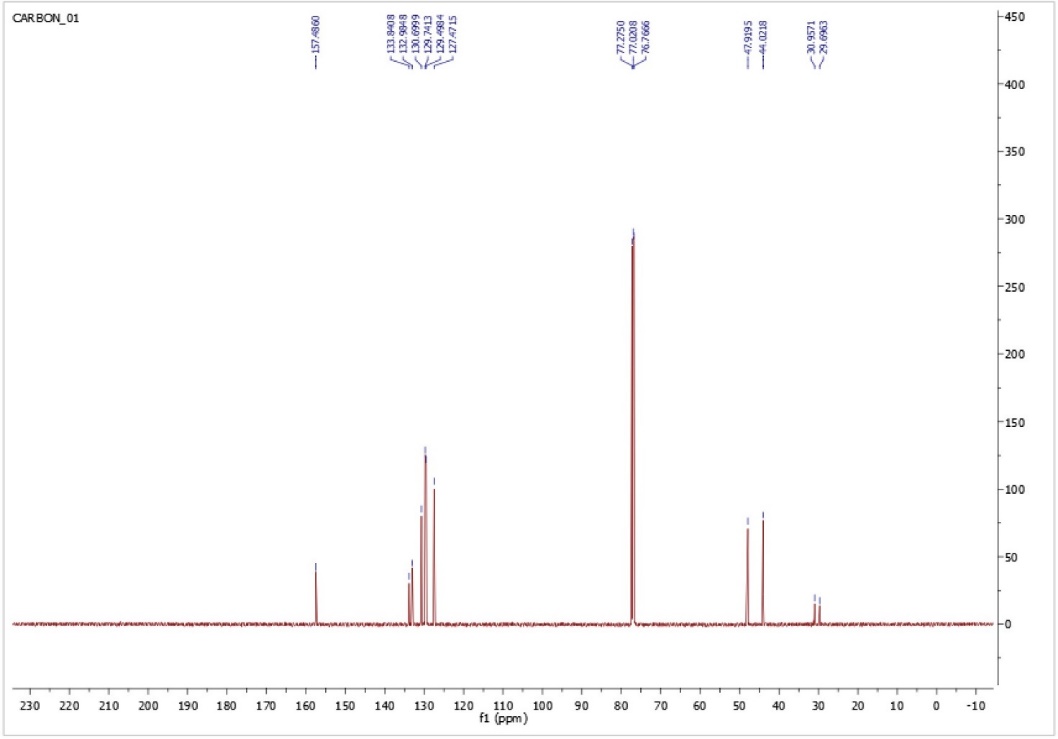


HPLC chromatogram (purity >97 %)


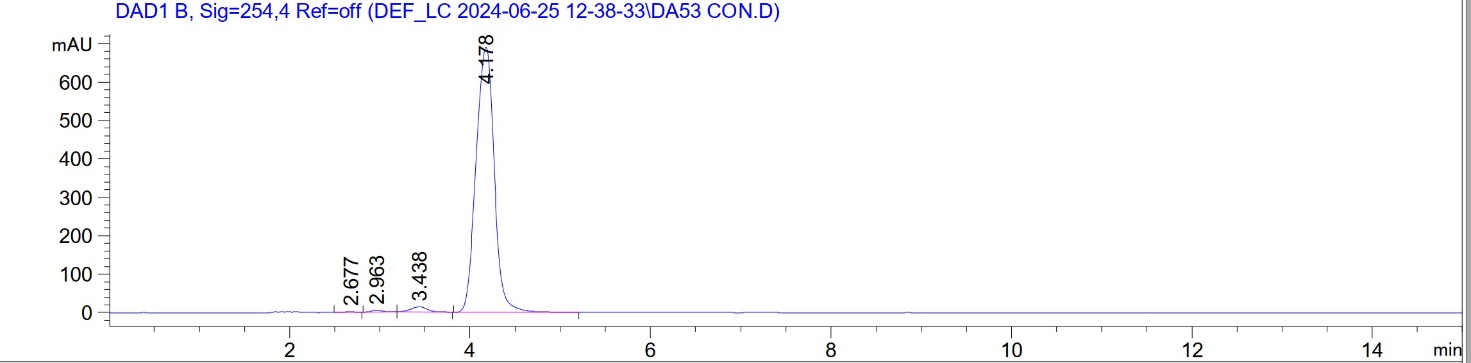


4-(3-Cyanobenzyl)-1-(4-chlorobenzyl)piperazin-2-one **21** (DA11)

1H-NMR (500 MHz, CDCl3)


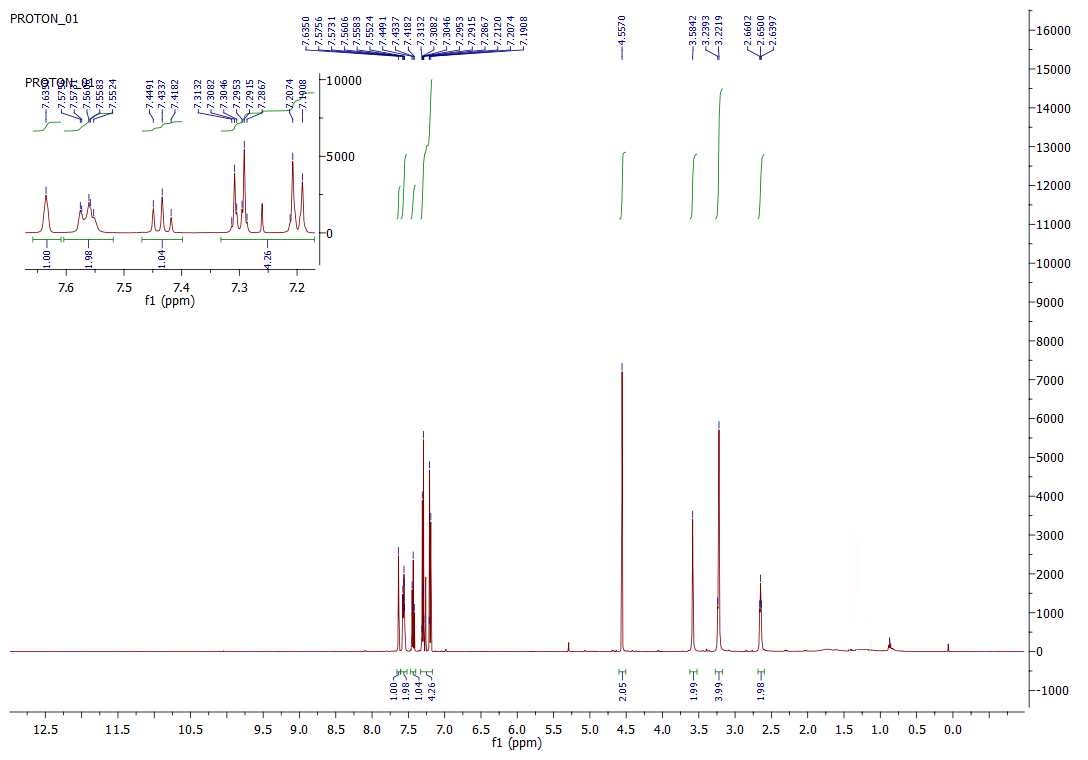


13C-NMR (125 MHz, CDCl3)


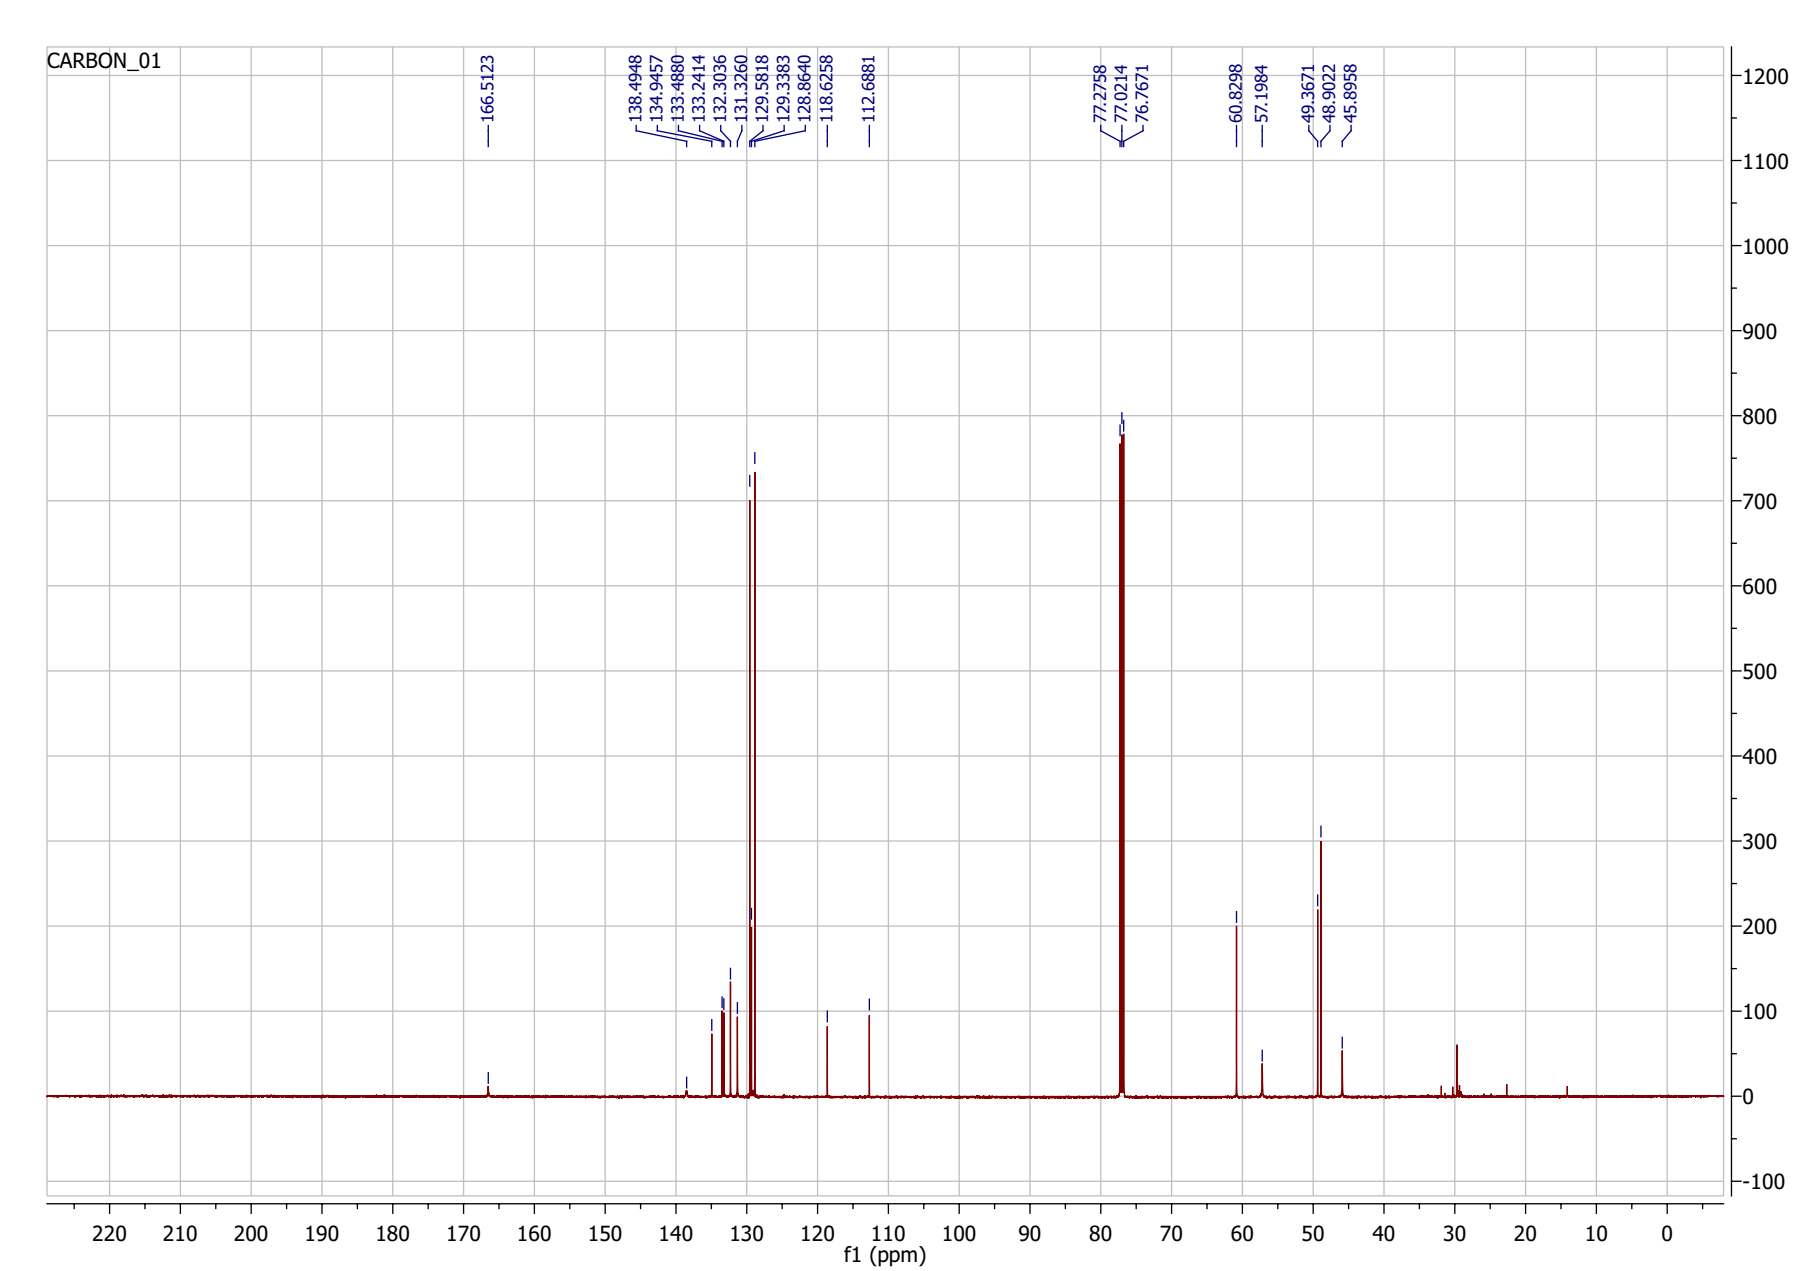


HPLC chromatogram (purity >97 %)


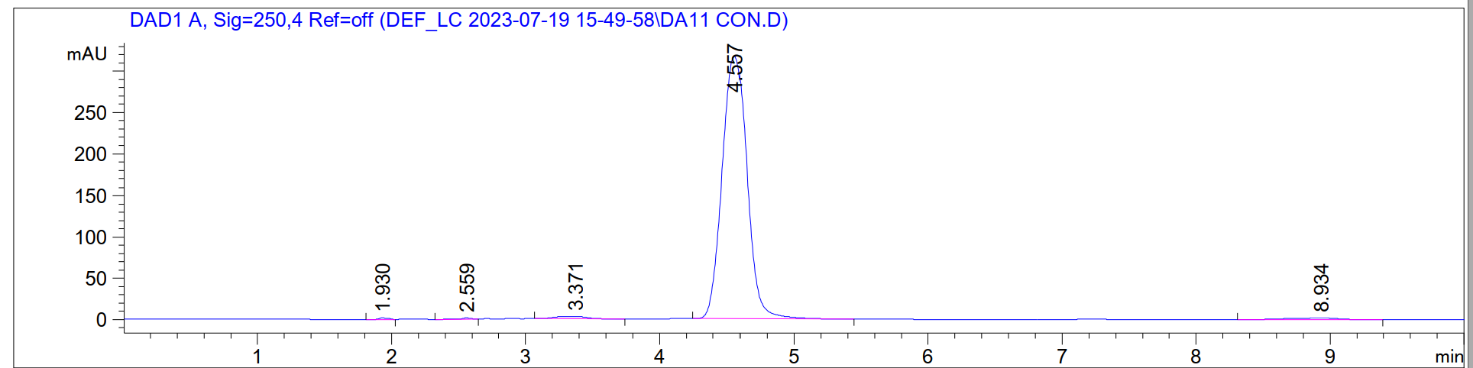


4-(3-Cyanobenzyl)-1-(4-(trifluoromethyl)benzyl)piperazin-2-one **22** (DA14)

1H-NMR (500 MHz, CDCl3)


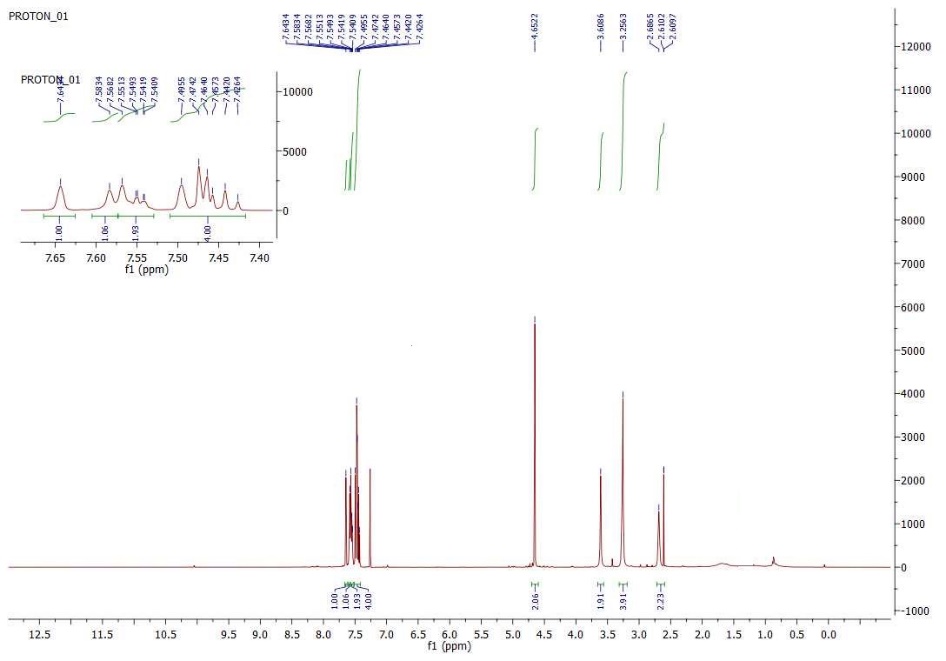


13C-NMR (125 MHz, CDCl3)


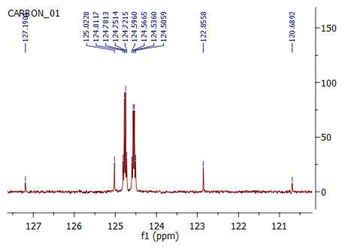

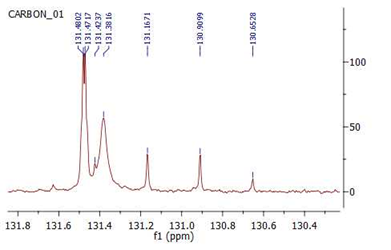


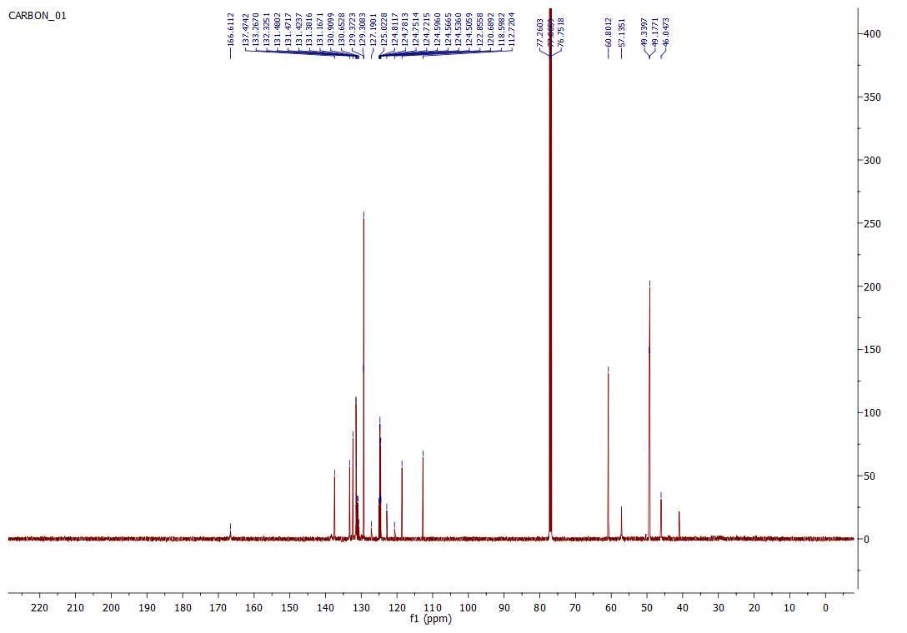


HPLC chromatogram (purity >95 %)


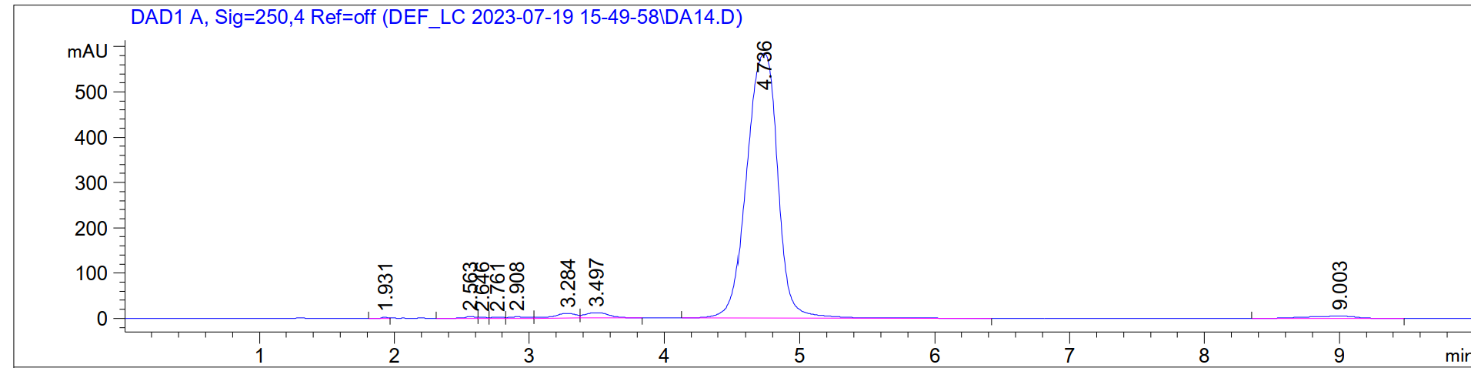


3-((4-(4-Fluorobenzyl)-3-oxopiperazin-1-yl)methyl)benzonitrile **23** (DA25)

1H-NMR (500 MHz, CDCl3)


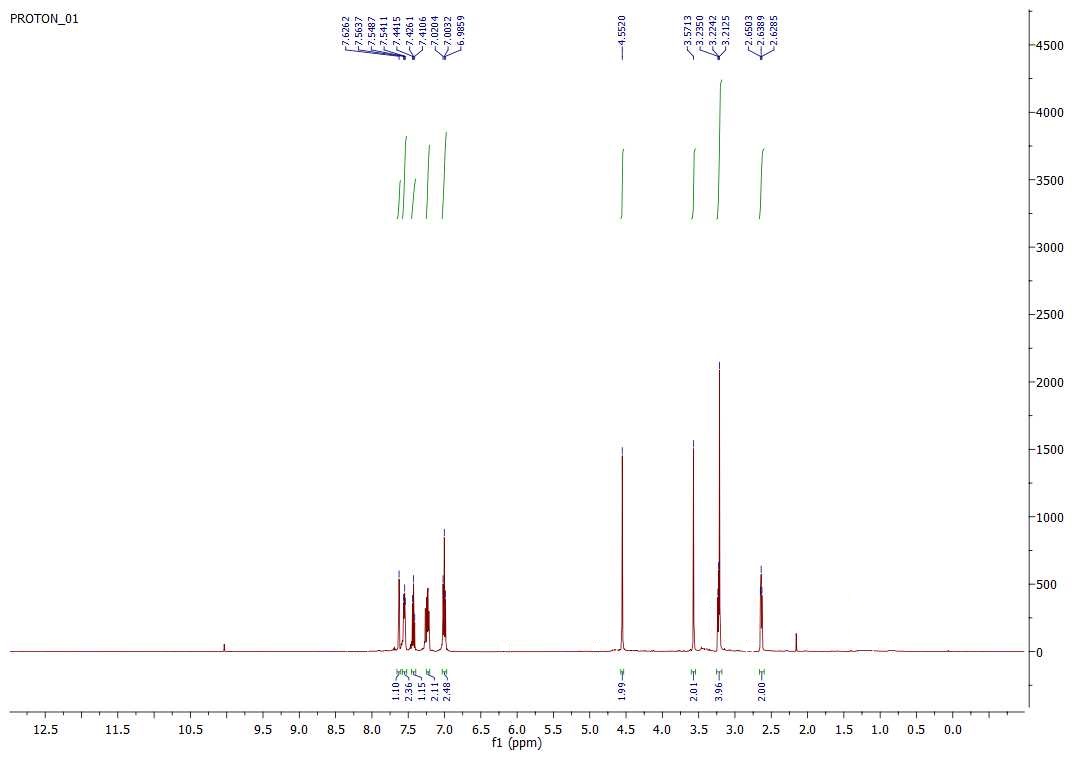


13C-NMR (125 MHz, CDCl3)


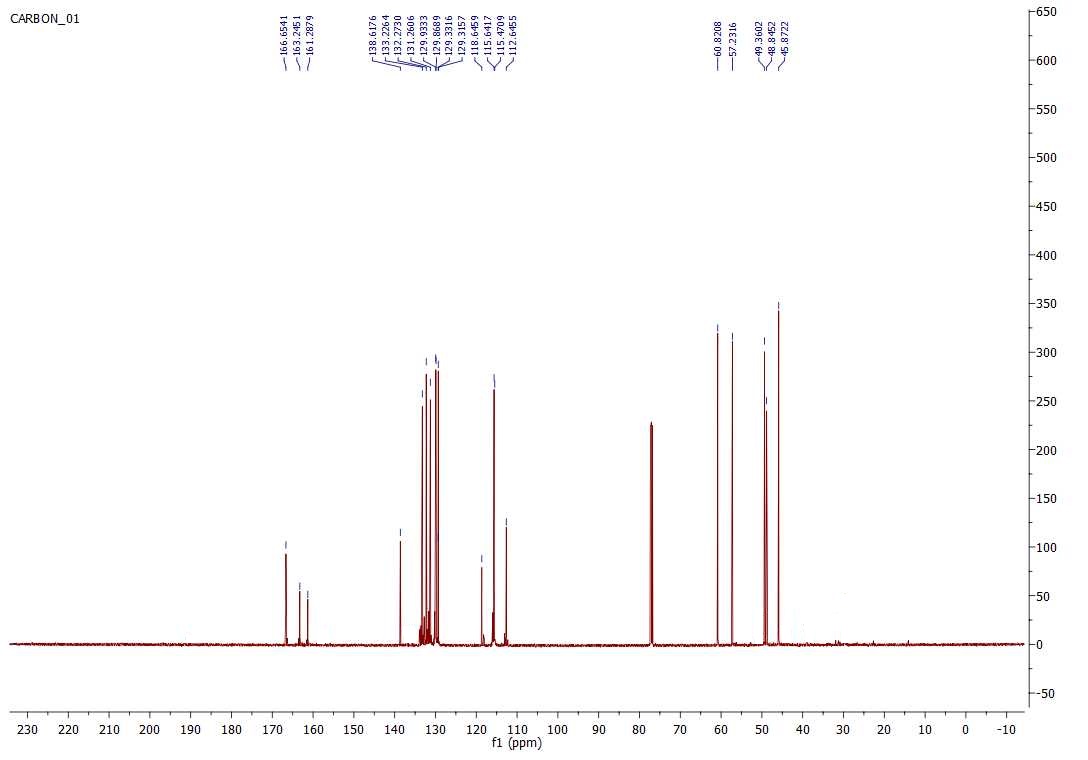


HPLC chromatogram (purity >96 %)


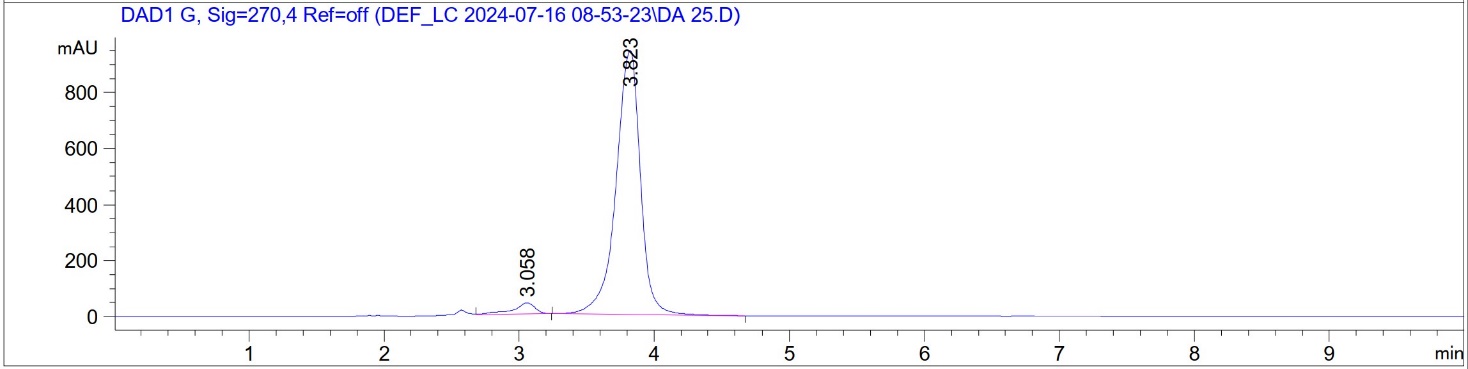


4-(3-Cyanobenzyl)-1-(3,4-dichlorobenzyl)piperazin-2-one **24** (DA26)

1H-NMR (300 MHz, CDCl3)


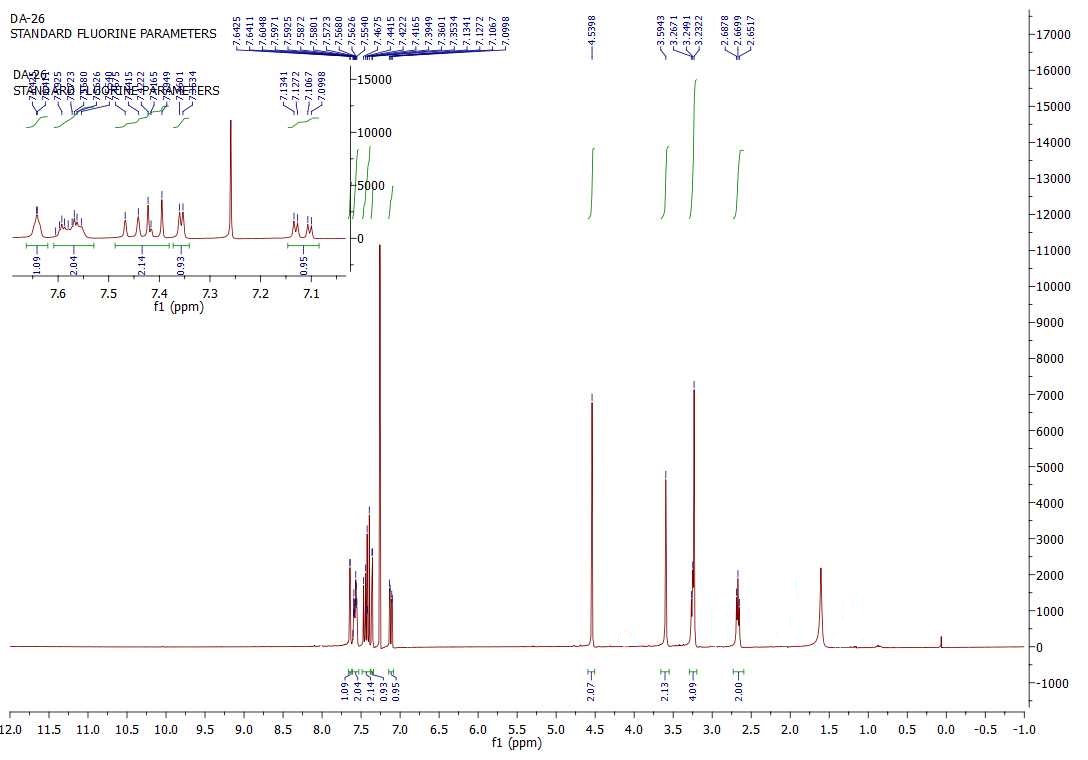


13C-NMR (125 MHz, CDCl3)


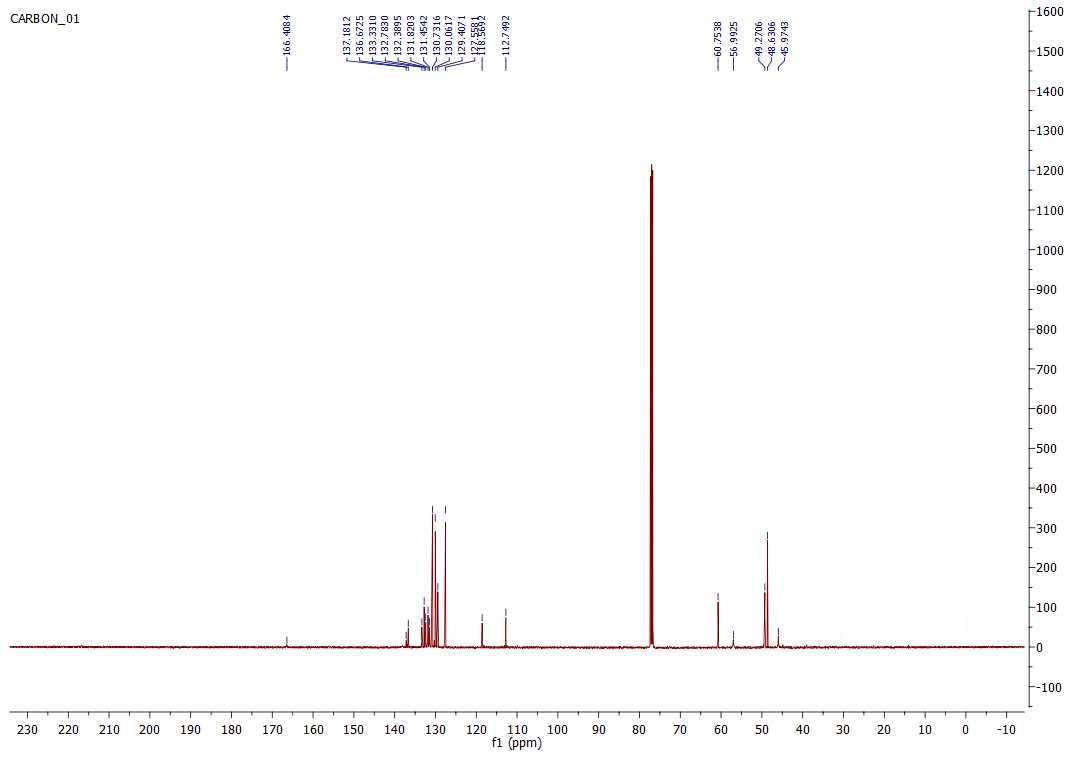


HPLC chromatogram (purity >99 %)


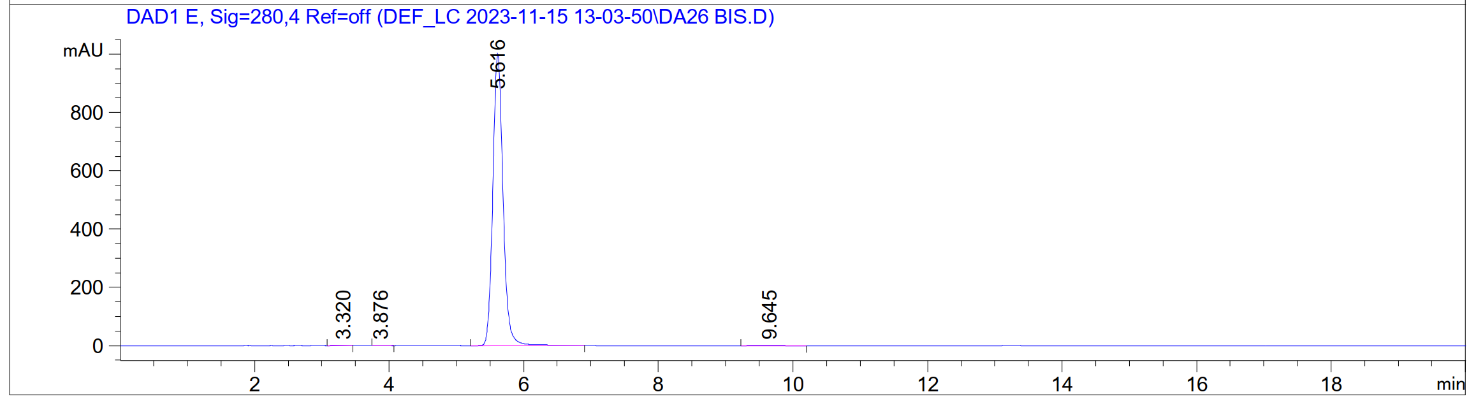


4-(3-Nitrobenzyl)-1-(3-(trifluoromethyl)benzyl)piperazin-2-one **25** (DA23)

1H-NMR (300 MHz, CDCl3)


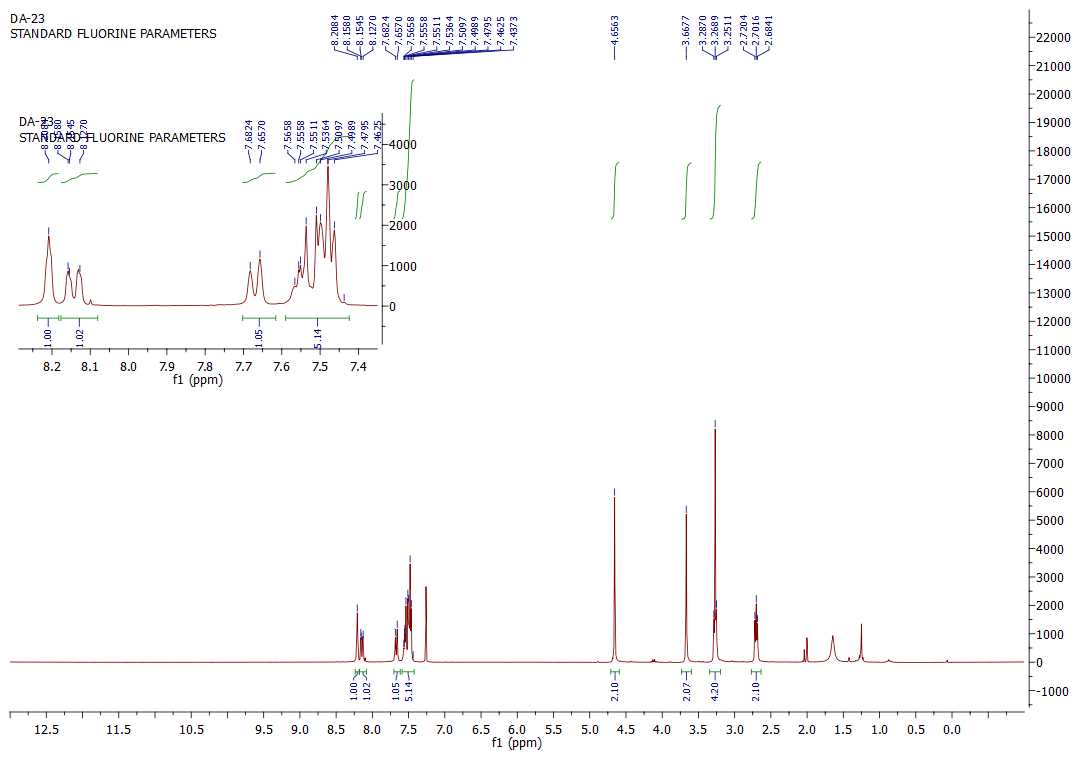


13C-NMR (125 MHz, CDCl3)


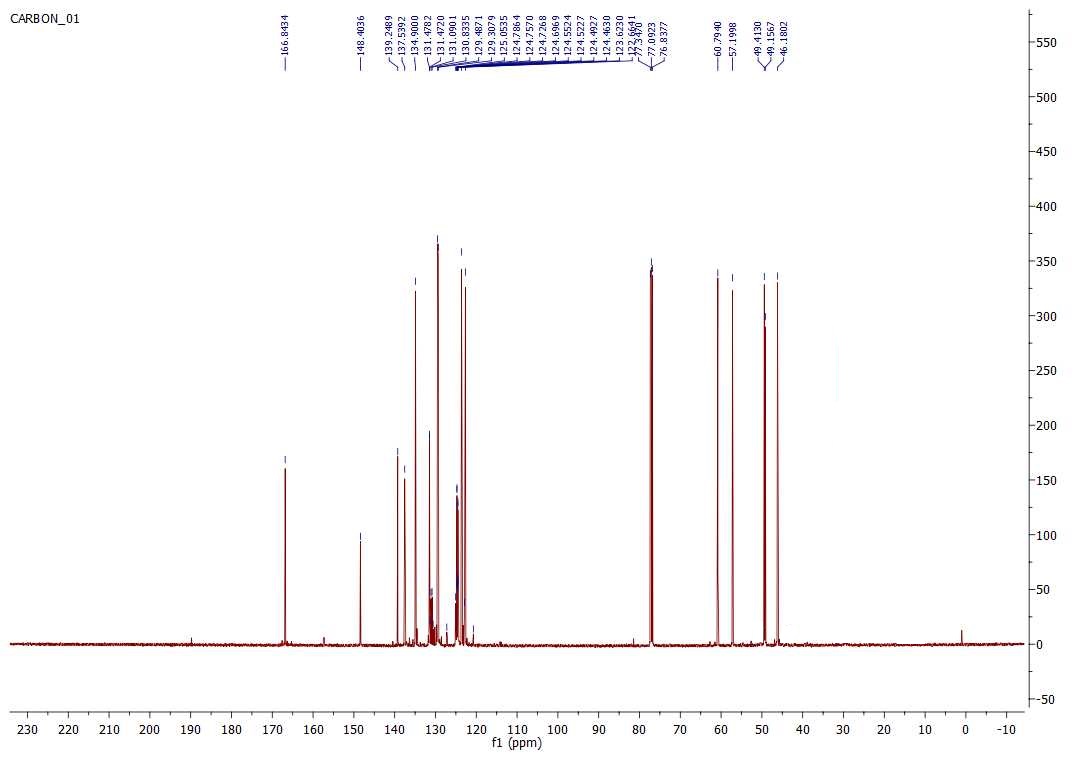


HPLC chromatogram (purity >97 %)


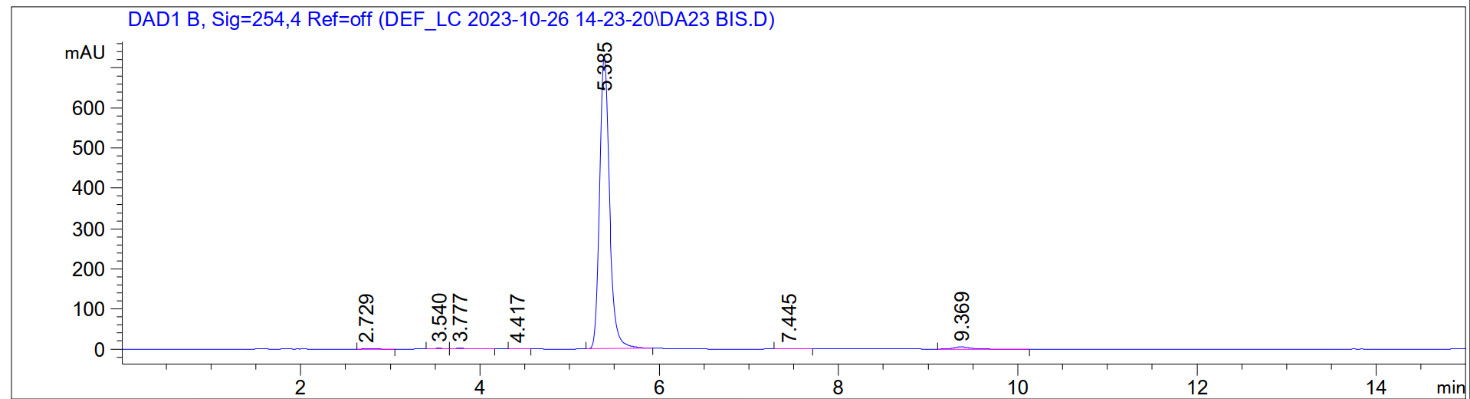


4-(3-(Trifluoromethyl)benzyl)-1-(4-(trifluoromethyl)benzyl)piperazin-2-one **26** (DA29)

1H-NMR (300 MHz, CDCl3)


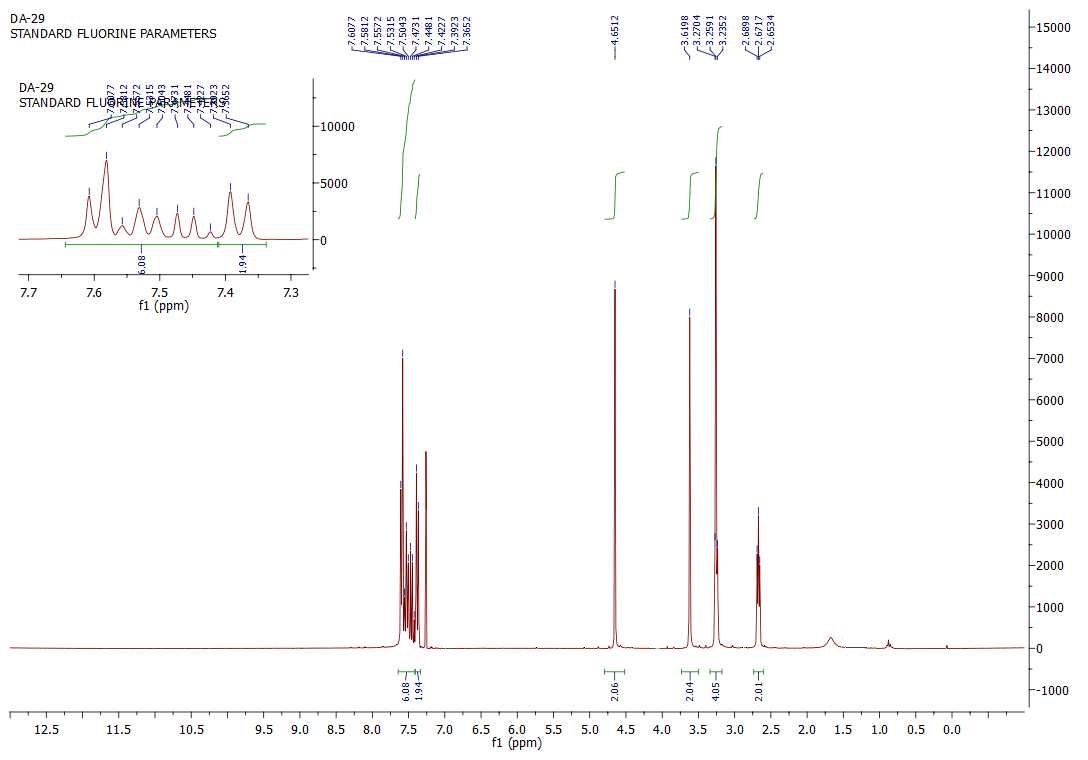


13C-NMR (125 MHz, CDCl3)


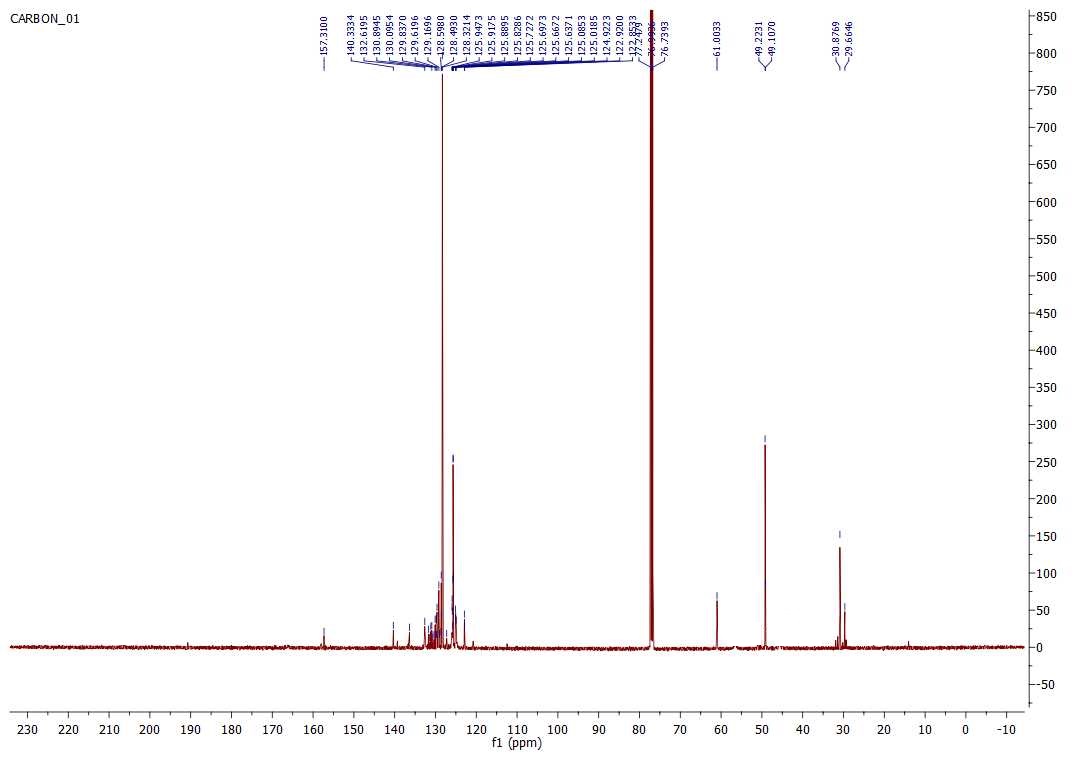


HPLC chromatogram (purity >96 %)
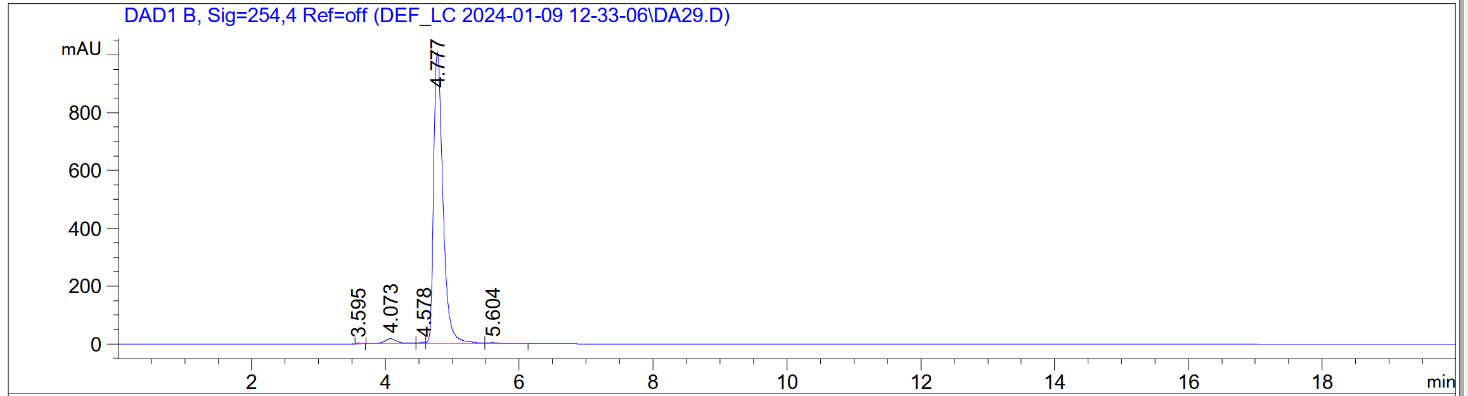


1-(3-Bromo-4-fluorobenzyl)-4-(4-(trifluoromethyl)benzyl)piperazin-2-one **27** (DA42)

1H-NMR (500 MHz, CD3OD)


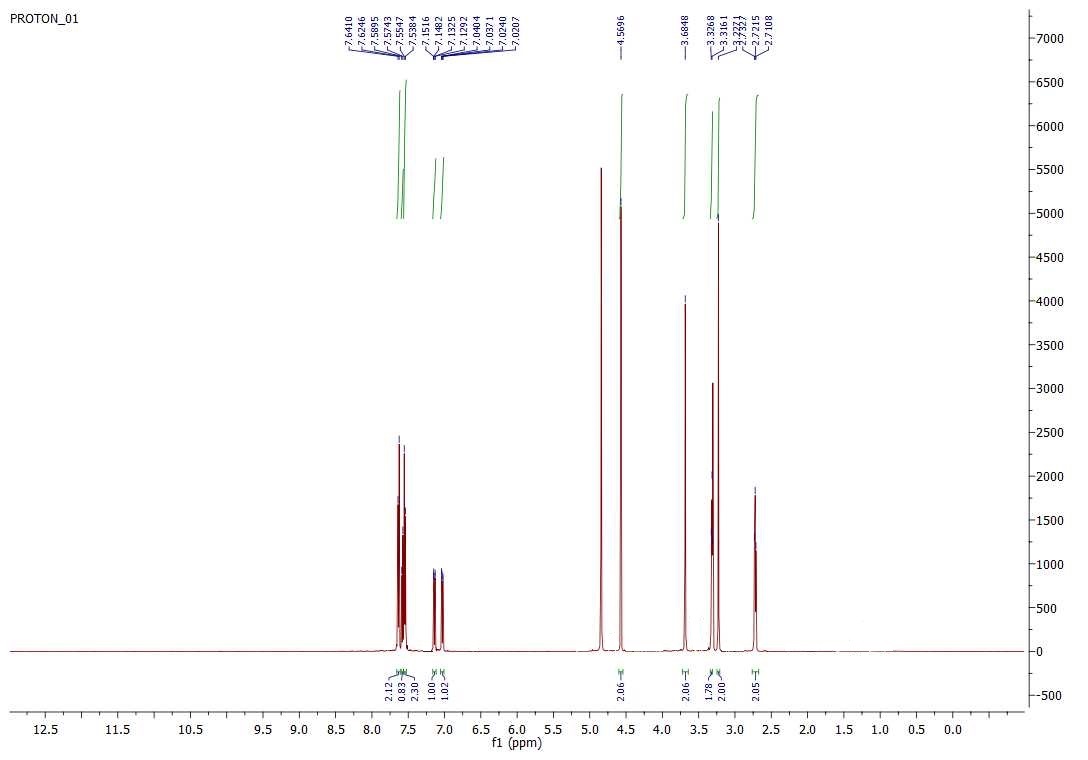


13C-NMR (125 MHz, CDCl3)


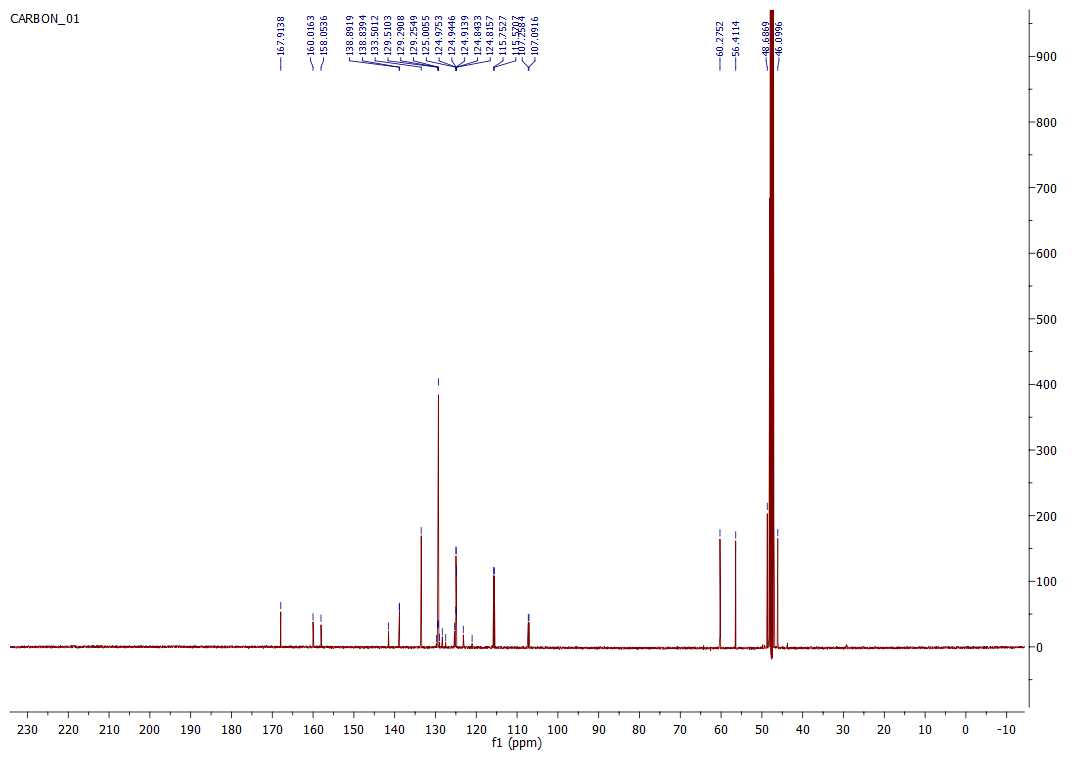


HPLC chromatogram (purity > 97 %)


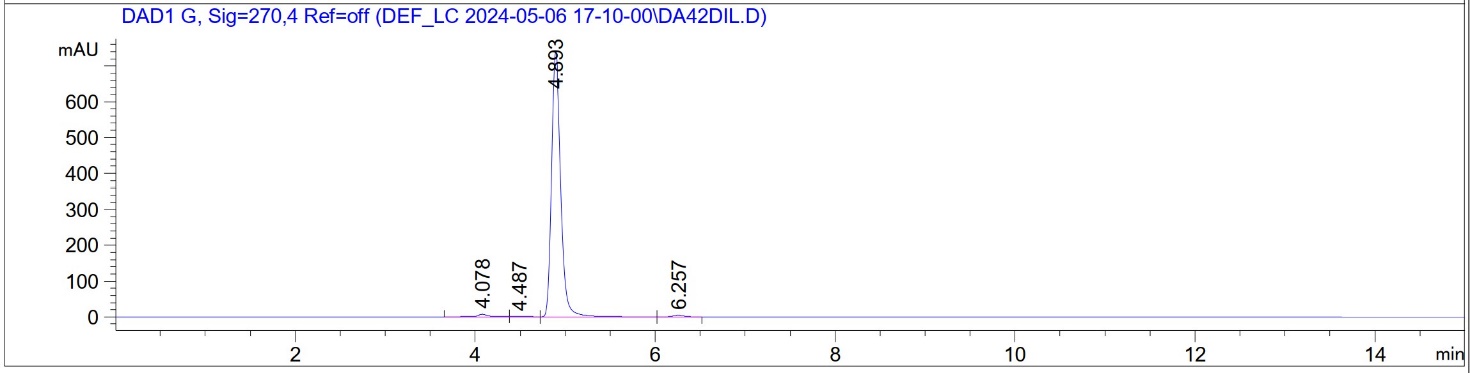


4-(2-(3,4-Dichlorophenyl)acetyl)-1-(4-(trifluoromethyl)benzyl)piperazin-2-one **31** (DA45)

1H-NMR (500 MHz, DMSO)


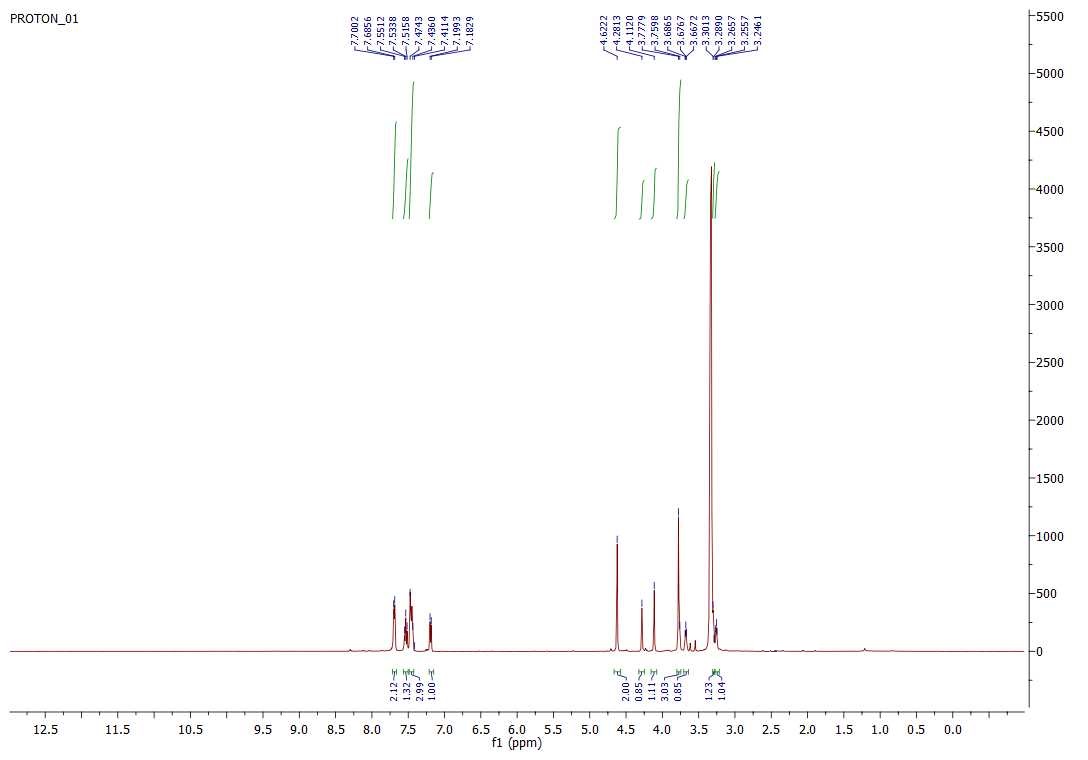


13C-NMR (125 MHz, DMSO)


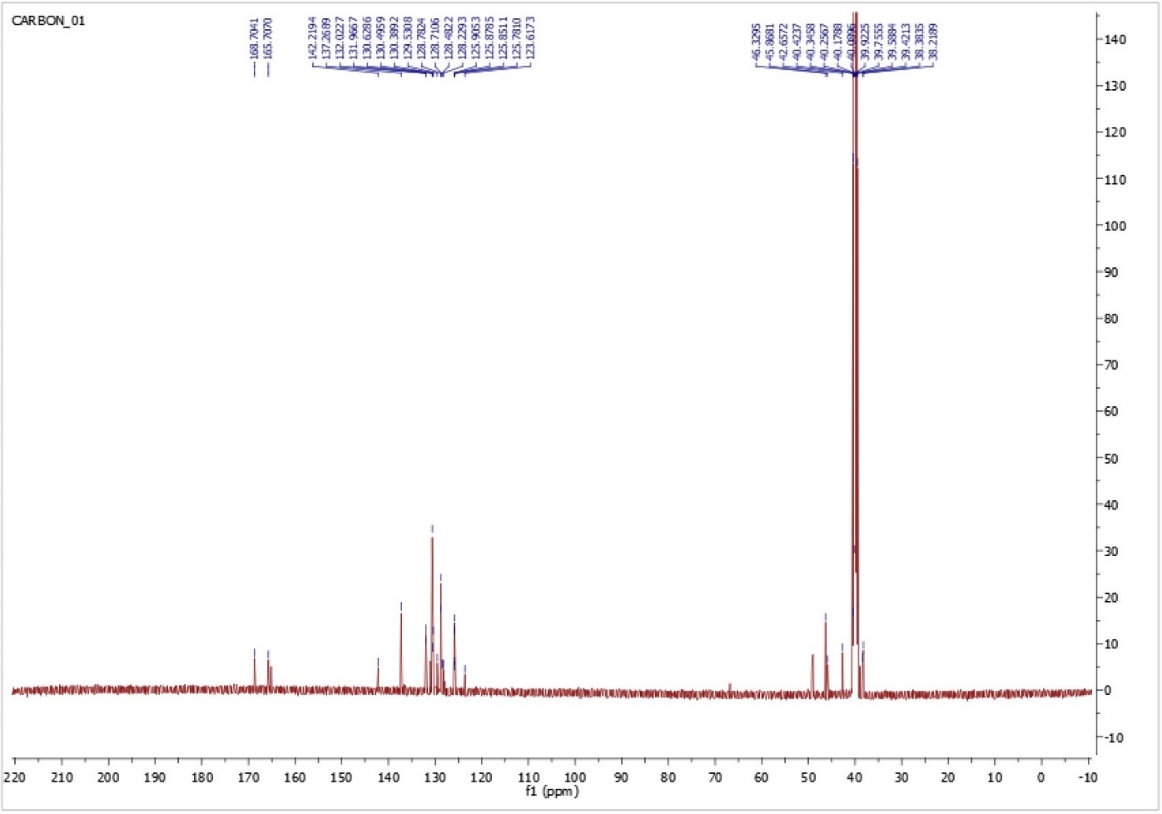


HPLC chromatogram (purity > 98 %)


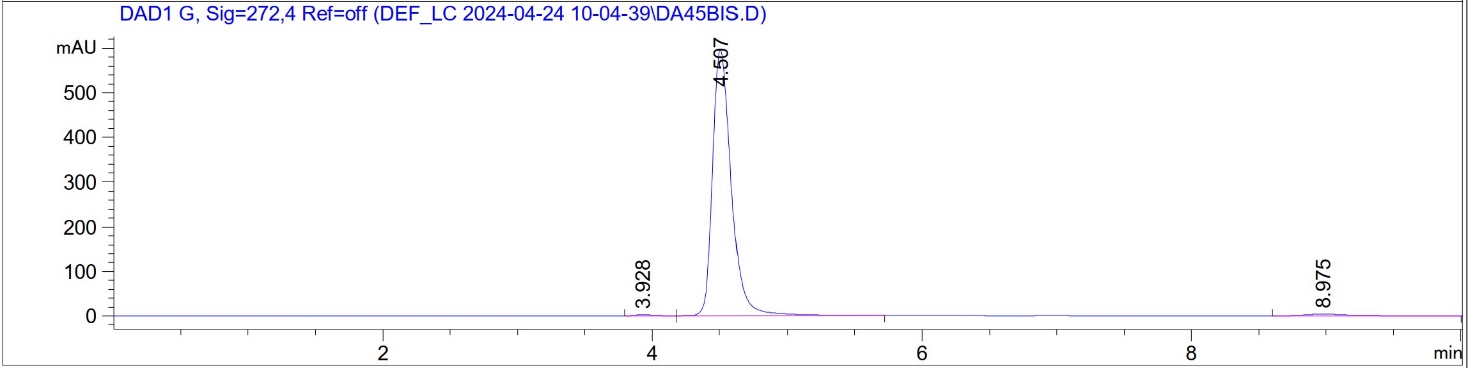


1,4-Dibenzylpiperazine-2,5-dione **33** (DA28)

1H-NMR (300 MHz, CDCl3)


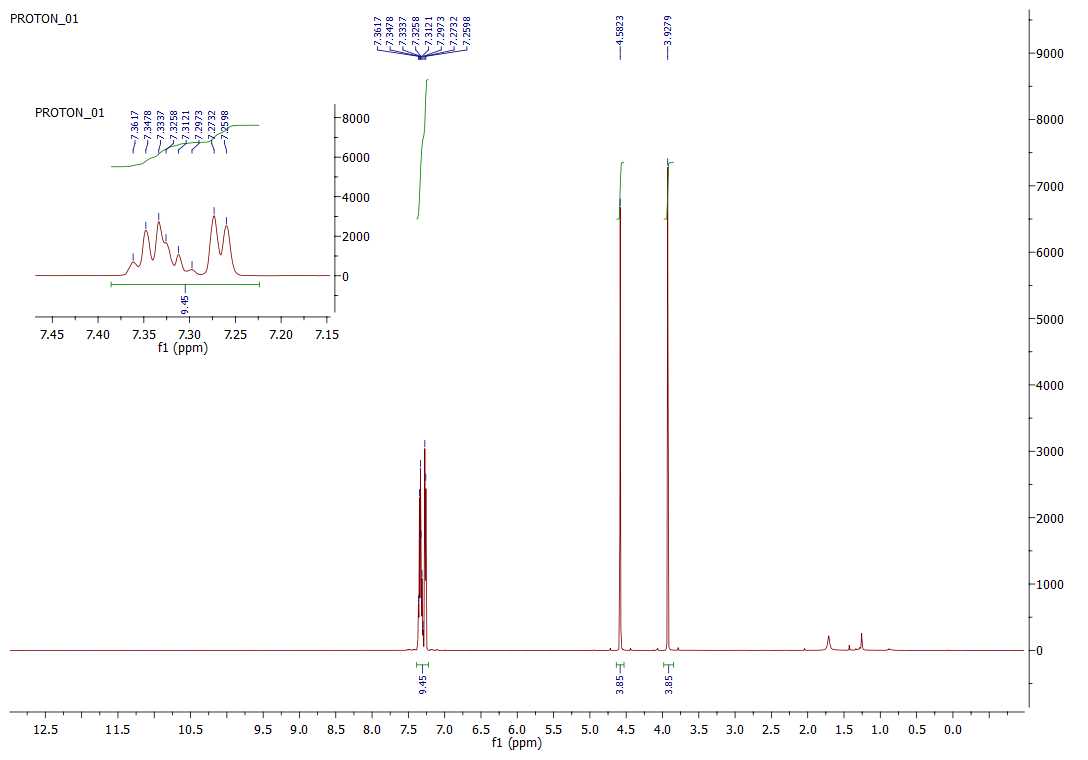


13C-NMR (125 MHz, CDCl3)


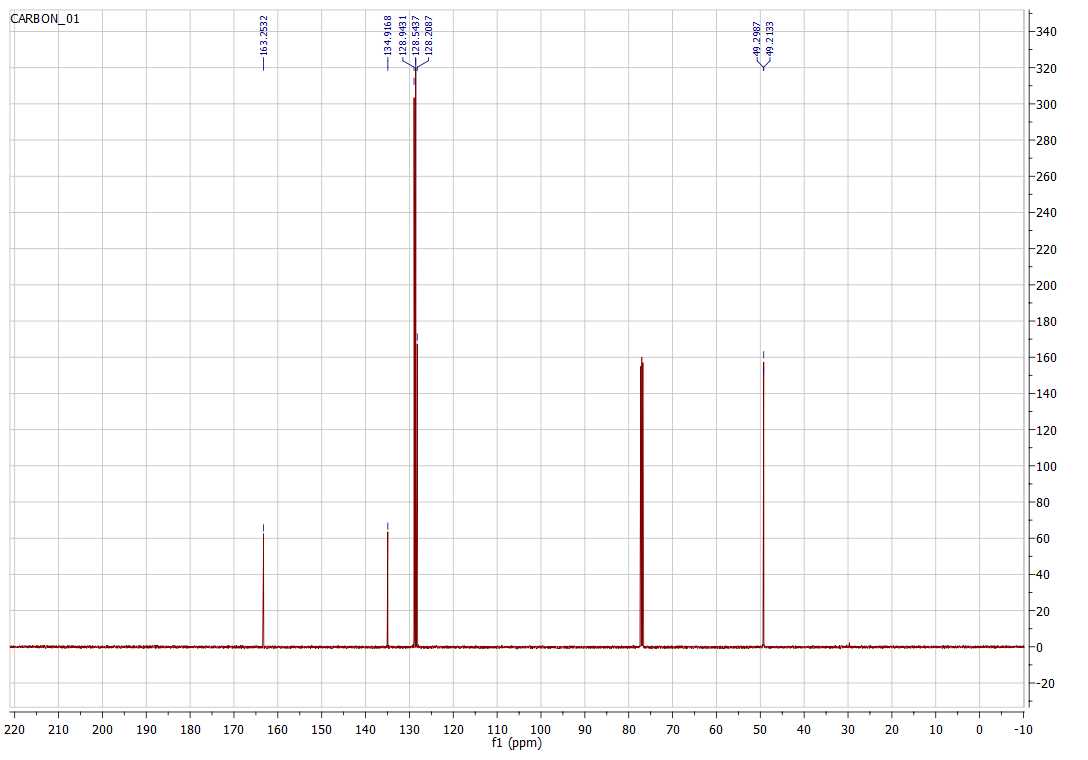


HPLC chromatogram (purity >99 %)


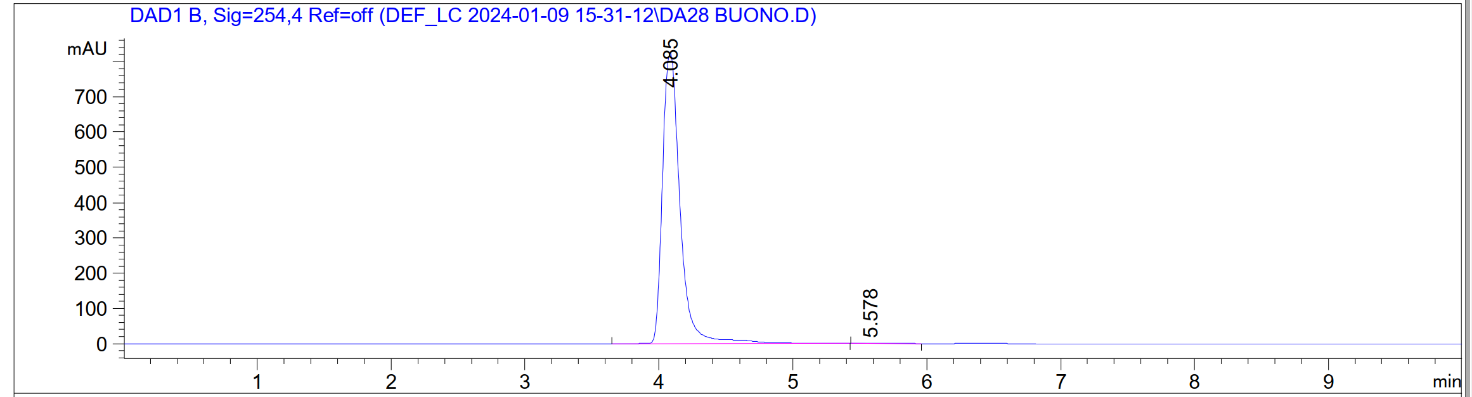


1,4-Bis(3-(trifluoromethyl)benzyl)piperazine-2,5-dione **34** (DA34)

1H-NMR (500 MHz, CDCl3)


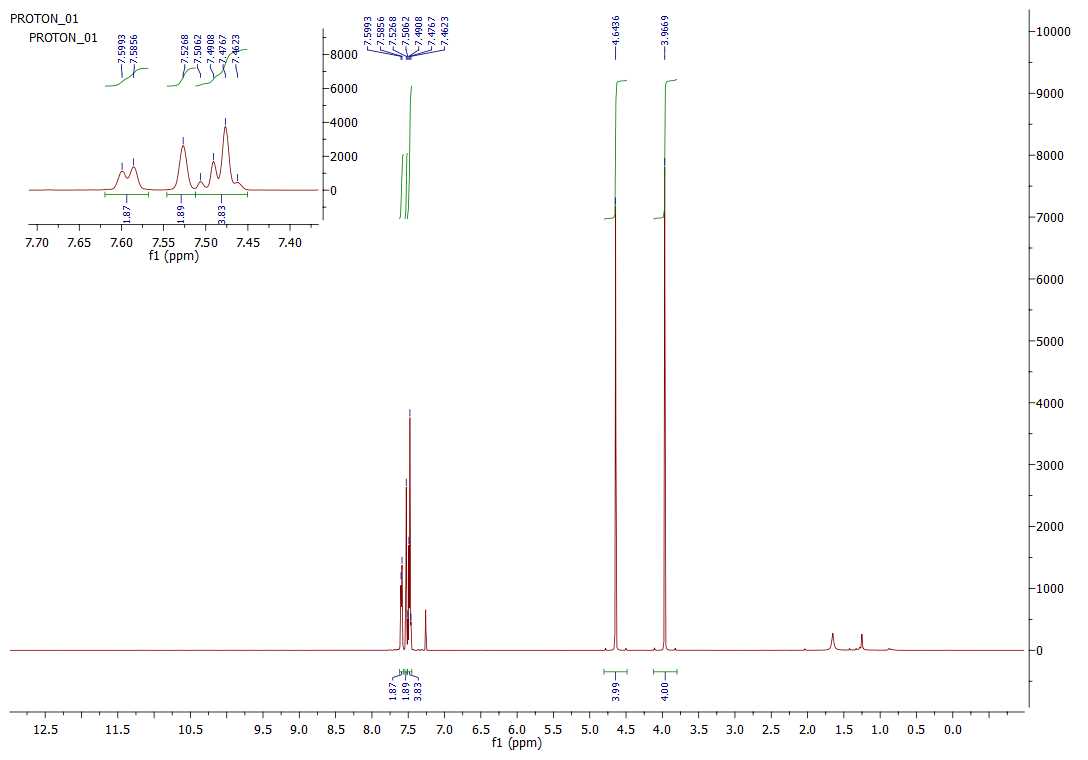


13C-NMR (125 MHz, CDCl3)


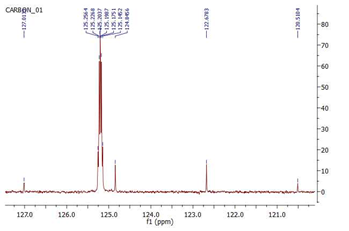

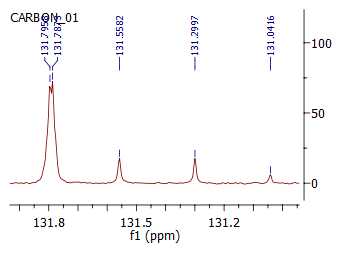


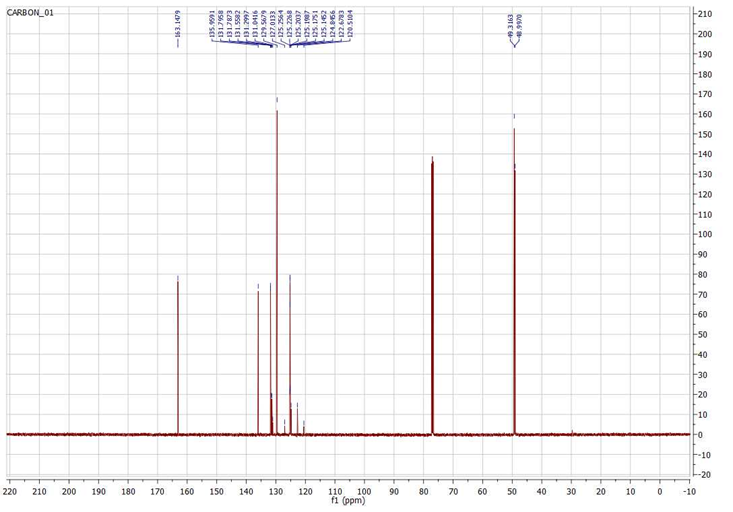


HPLC chromatogram (purity >99 %)


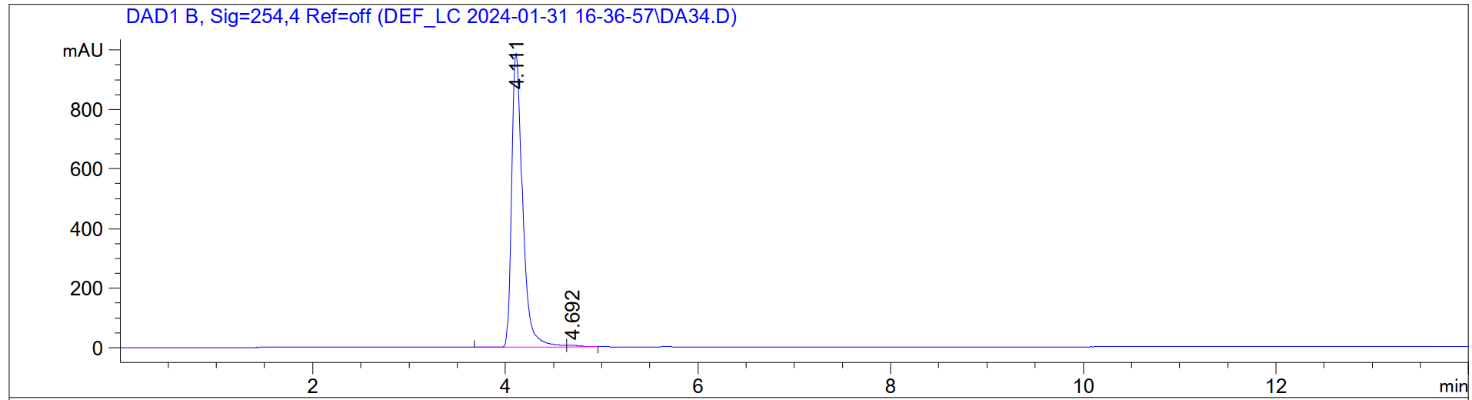


1. **Supplementary Table S1**

| **Competition *vs* [3H]-*N*-Methylspiperone** | | |
| --- | --- | --- |
| **Compound** | ***h*D2R** | ***h*D3R** |
| **pKi ± SEM** | **pKi ± SEM** |
| **9** (DA17) | <5 | <5 |
| **11** (DA24) | <5 | <5 |
| **12** (DA32) | <5 | <5 |
| **14** (DA33) | <5 | <5 |
| **15** (DA35) | <5 | <5 |
| **16** (DA53) | <5 | <5 |
| **26** (DA29) | <5 | <5 |
| **27** (DA42) | <5 | <5 |
| **31** (DA45) | <5 | <5 |
| **33** (DA28) | <5 | <5 |
| **34** (DA34) | <5 | <5 |

**Table S1.** Radioligand Binding Data for *h*D2R and *h*D3R. Radioligand competition binding assays performed on HEK293 cells stably expressing *h*D2R and *h*D3R in the presence of [3H]-*N*-Methylspiperone. Equilibrium dissociation constants (Ki) were derived from IC50 values using the Cheng−Prusoff equation. pKi = -log10(Ki). pKi <5 represents <50% inhibition at the highest tested concentration of 10 mM.

**3. Supplementary Table S2**

| Human ClpP with **26** (DA29) | | |
| --- | --- | --- |
| PDBID | 9Z3C | |
| Wavelength | 0.979338 | |
| Resolution range | 34.41 - 2.781 (2.84 - 2.78) | |
| Space group | C 1 2 1 | |
| Unit cell | 170.061 121.139 100.826 90 116.58 90 | |
| Total reflections | 332548 | |
| Unique reflections | 46004 (2866) | |
| Multiplicity | 7.2 | |
| Completeness (%) | 99.95 (99.90) | |
| Mean I/sigma(I) | 7.1 | |
| Wilson B-factor | 39.83 |
| R-merge | 0.296 |
| R-meas | 0.347 |
| R-pim | 0.179 |
| CC1/2 | 0.977 |
| CC* | 0.994 |
| Reflections used in refinement | 46004 (2866) |
| Reflections used for R-free | 2307 (150) |
| R-work | 0.1898 (0.3009) |
| R-free | 0.2407 (0.3657) |
| Number of non-hydrogen atoms | 9818 |
| macromolecules | 9479 |
| ligands | 209 |
| solvent | 130 |
| Protein residues | 1223 |
| Nucleic acid bases | 0 |
| RMS (bonds) | 0.002 |
| RMS (angles) | 0.51 |
| Ramachandran favored (%) | 95.94 |
| Ramachandran allowed (%) | 4.06 |
| Ramachandran outliers (%) | 0 |
| Rotamer outliers (%) | 0.67 |
| Clashscore | 3.25 |
| Average B-factor | 40.04 |
| macromolecules | 40.01 |
| ligands | 43.49 |
| solvent | 37.04 |

*Statistics for the highest resolution shells are found in parentheses

**Table S2.** Data collection and refinement statistics for *h*ClpP bound with **26** (DA29).

**4. Supplementary Table S3**


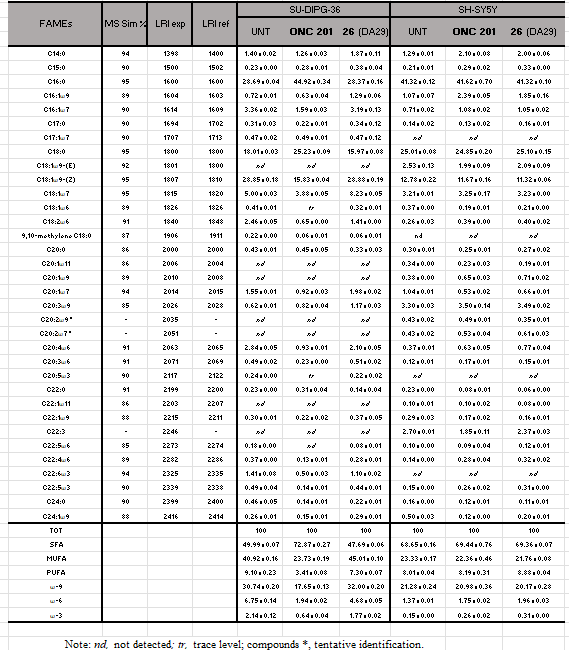


**Table S3.** List of fatty acids detected in SH-SY5Y and SU-DIPG-36 cell lines untreated and treated with **ONC201** and **26** (DA29). Identification parameters: mass spectral similarity (MS sim.); experimental linear retention index (LRI exp.); reference linear retention index (LRI ref.). FAMEs amounts were expressed in area % (GC-FID area normalized) ± standard deviation. Fatty acids were also grouped in chemical class as follows: SFA: saturated fatty acid; MUFA: monounsaturated fatty acid; PUFA: polyunsaturated fatty acid; ω-9: omega-9; ω-6: omega-6; ω-3: omega-3. UN= Untreated.

**5. Supplementary Table S3**


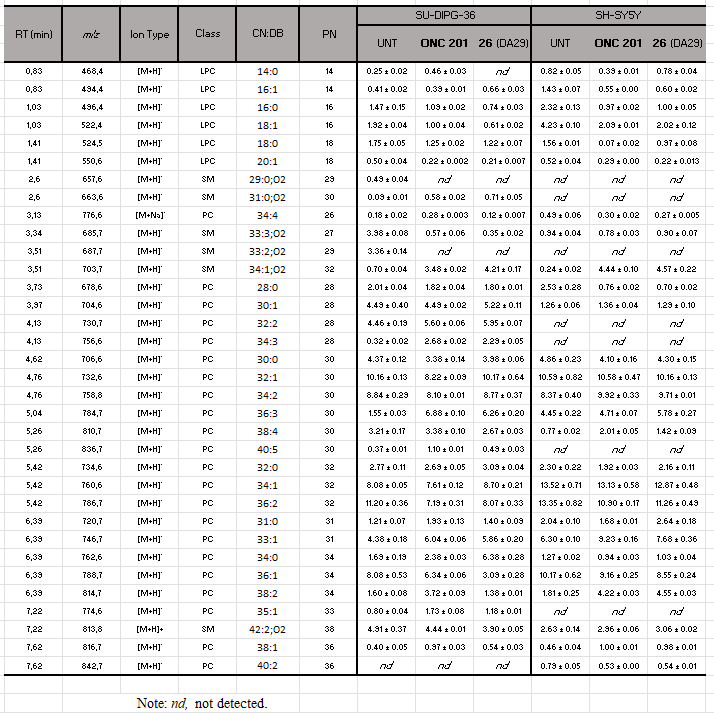


**Table S3.** List of lysophosphocholine (LPC), phoshocholine (PC), and sphingomyelin (SM) detected in SH-SY5Y and SU-DIPG-36 cell lines untreated and treated with **ONC201** and **26** (DA29). Abbreviations: RT (min), retention time; *m/z*, mass/charge ratio; CN:DB, carbon number and double bond; PN: partition number. Lipid amounts were expressed in area % ± standard deviation. UNT=Untreated.

**6. Supplementary Table S5**

| RT (min) | *m/z* | Ion Type | Class | CN:DB | PN | SU-DIPG-36 | | | SH-SY5Y | | |
| --- | --- | --- | --- | --- | --- | --- | --- | --- | --- | --- | --- |
| UNT | **ONC**  **201** | **26** | UNT | **ONC 201** | **26** |
| 9.67 | 844.6 | [M+NH4]+ | TG | 50:4 | 42 | 0.41 ± 0.01 | 1.49 ± 0.05 | 1.06 ± 0.09 | 1.10 ± 0.09 | 0.60 ± 0.00 | 0.59 ± 0.01 |
| 9.67 | 870.7 | [M+NH4]+ | TG | 52:5 | 42 | 0.09 ± 0.00 | - ± - | - ± - | 1.04 ± 0.02 | - ± - | - ± - |
| 9.97 | 794.8 | [M+NH4]+ | TG | 46:1 | 44 | 2.27 ± 0.16 | 5.24 ± 0.33 | 4.67 ± 0.34 | 1.78 ± 0.09 | 3.49 ± 0.04 | 3.31 ± 0.02 |
| 9.97 | 820.8 | [M+NH4]+ | TG | 48:2 | 44 | 2.15 ± 0.37 | 7.21 ± 0.33 | 8.82 ± 0.41 | 2.21 ± 0.11 | 5.43 ± 0.17 | 4.50 ± 0.07 |
| 9.97 | 846.8 | [M+NH4]+ | TG | 50:3 | 44 | 1.94 ± 0.23 | 5.20 ± 0.11 | 6.41 ± 0.05 | 1.12 ± 0.06 | 2.67 ± 0.05 | 2.05 ± 0.07 |
| 9.97 | 872.9 | [M+NH4]+ | TG | 52:4 | 44 | 0.73 ± 0.07 | 3.28 ± 0.16 | 1.91 ± 0.16 | 0.77 ± 0.06 | 1.26 ± 0.02 | 1.29 ± 0.05 |
| 11.00 | 796.9 | [M+NH4]+ | TG | 46:0 | 46 | 1.90 ± 0.13 | 2.87 ± 0.09 | 1.97 ± 0.16 | 2.34 ± 0.20 | 1.62 ± 0.04 | 1.91 ± 0.03 |
| 11.00 | 822.9 | [M+NH4]+ | TG | 48:1 | 46 | 5.68 ± 0.53 | 6.40 ± 0.08 | 7.02 ± 0.17 | 6.56 ± 0.39 | 6.86 ± 0.09 | 6.87 ± 0.19 |
| 11.00 | 848.9 | [M+NH4]+ | TG | 50:2 | 46 | 5.67 ± 0.53 | 8.87 ± 0.13 | 8.64 ± 0.38 | 8.49 ± 0.68 | 9.85 ± 0.02 | 10.39 ± 0.42 |
| 11.00 | 874.9 | [M+NH4]+ | TG | 52:3 | 46 | 1.40 ± 0.13 | 9.26 ± 0.23 | 8.55 ± 0.31 | 5.73 ± 0.21 | 6.52 ± 0.08 | 6.95 ± 0.40 |
| 11.00 | 900.7 | [M+NH4]+ | TG | 54:4 | 46 | 0.94 ± 0.13 | 3.91 ± 0.19 | 4.14 ± 0.25 | 1.76 ± 0.04 | 1.60 ± 0.06 | 2.13 ± 0.07 |
| 12.25 | 850.9 | [M+NH4]+ | TG | 50:1 | 48 | 4.45 ± 0.54 | 6.24 ± 0.11 | 7.45 ± 0.11 | 12.30 ± 0.12 | 10.01 ± 0.14 | 9.43 ± 0.15 |
| 12.25 | 876.9 | [M+NH4]+ | TG | 52:2 | 48 | 11.13 ± 0.33 | 13.64 ± 0.05 | 13.75 ± 0.24 | 15.78 ± 0.76 | 14.04 ± 0.05 | 13.90 ± 0.11 |
| 12.25 | 902.9 | [M+NH4]+ | TG | 54:3 | 48 | 19.37 ± 1.14 | 12.33 ± 0.62 | 13.78 ± 0.54 | 11.64 ± 0.51 | 12.30 ± 0.79 | 11.59 ± 0.19 |
| 13.99 | 878.9 | [M+NH4]+ | TG | 52:1 | 50 | 13.49 ± 0.62 | 3.84 ± 0.11 | 3.50 ± 0.17 | 10.76 ± 0.58 | 8.20 ± 0.22 | 8.04 ± 0.59 |
| 13.99 | 904.8 | [M+NH4]+ | TG | 54:2 | 50 | 17.60 ± 0.93 | 6.19 ± 0.17 | 5.19 ± 0.10 | 9.88 ± 0.35 | 8.95 ± 0.28 | 10.41 ± 0.66 |
| 13.99 | 930.9 | [M+NH4]+ | TG | 56:3 | 50 | 7.17 ± 0.36 | 2.56 ± 0.08 | 1.95 ± 0.11 | 2.92 ± 0.05 | 3.89 ± 0.03 | 4.07 ± 0.17 |
| 15.14 | 906.8 | [M+NH4]+ | TG | 54:1 | 52 | 3.62 ± 0.29 | 1.48 ± 0.02 | 1.19 ± 0.09 | 3.82 ± 0.07 | 2.71 ± 0.04 | 2.58 ± 0.11 |

**Table S5.** List of triglycerides (TGs) detected in SH-SY5Y and SU-DIPG-36 cell lines untreated and treated with **ONC201** and **26** (DA29). Abbreviations: RT (min), retention time; *m/z*, mass/charge ratio; CN:DB, carbon number and double bond; PN: partition number. Lipid amounts were expressed in area % ± standard deviation. UNT= Untreated.

**7. Supplementary Table S6**

|  | **SU-DIPG-36** | | **SH-SY5Y** | |
| --- | --- | --- | --- | --- |
| **Lipid** | **ONC201** | **26** (DA29) | **ONC201** | **26** (DA29) |
| LPC 14:0 | ↑ | ↓ | ↓ | *ns* |
| LPC 16:1 | *ns* | ↑ | ↓ | ↓ |
| LPC 16:0 | ↓ | ↓ | ↓ | ↓ |
| LPC 18:1 | ↓ | ↓ | ↓ | ↓ |
| LPC 18:0 | ↓ | ↓ | ↓ | ↓ |
| LPC 20:1 | ↓ | ↓ | ↓ | ↓ |
| SM 29:0;O2 | ↓ | ↓ | *nd* | *nd* |
| SM 31:0;O2 | ↑ | ↑ | *nd* | *nd* |
| PC 34:4 | ↑ | *ns* | ↓ | ↓ |
| SM 33:3;O2 | ↓ | ↓ | ↓ | *ns* |
| SM 33:2;O2 | ↓ | ↓ | *nd* | *nd* |
| SM 34:1;O2 | ↑ | ↑ | ↑ | ↑ |
| PC 28:0 | ↓ | ↓ | ↓ | ↓ |
| PC 30:1 | *ns* | ↑ | *ns* | *ns* |
| PC 32:2 | ↑ | ↑ | *nd* | *nd* |
| PC 34:3 | ↑ | ↑ | *nd* | *nd* |
| PC 30:0 | ↓ | ↓ | ↓ | *ns* |
| PC 32:1 | ↓ | *ns* | *ns* | *ns* |
| PC 34:2 | ↓ | *ns* | ↑ | ↑ |
| PC 36:3 | ↑ | ↑ | *ns* | ↑ |
| PC 38:4 | *ns* | ↓ | ↑ | ↑ |
| PC 40:5 | ↑ | ↑ | *nd* | *nd* |
| PC 32:0 | *ns* | ↑ | *ns* | *ns* |
| PC 34:1 | ↓ | ↑ | *ns* | *ns* |
| PC 36:2 | ↓ | ↓ | ↓ | ↓ |
| PC 31:0 | ↑ | ↑ | ↓ | ↑ |
| PC 33:1 | ↑ | ↑ | ↑ | ↑ |
| PC 34:0 | ↑ | ↑ | ↓ | ↓ |
| PC 36:1 | ↓ | ↓ | *ns* | *ns* |
| PC 38:2 | ↑ | *ns* | ↑ | ↑ |
| PC 35:1 | ↑ | ↑ | *nd* | *nd* |
| SM 42:2;O2 | *ns* | ↓ | ↑ | ↑ |
| PC 38:1 | ↑ | ↑ | ↑ | ↑ |
| PC 40:2 | *nd* | *nd* | ↓ | ↓ |

**Table S6.** Choline-containing lipids identified in the SU-DIPG-36 and SH-SY5Y cell lines and their relative trends upon 24 h treatment with **ONC201** and **26** (DA29). Legend: ↑, significant increase; ↓, significant decrease; *ns*, not significant; *nd*, not detected.

**8. Supplementary Table S7**

|  | **SU-DIPG-36** | | **SH-SY5Y** | |
| --- | --- | --- | --- | --- |
| **Lipid** | **ONC201** | **26** (DA29) | **ONC201** | **26** (DA29) |
| TG 50:4 | ↑ | ↑ | ↓ | ↓ |
| TG 52:5 | ↓ | ↓ | ↓ | ↓ |
| TG 46:1 | ↑ | ↑ | ↑ | ↑ |
| TG 48:2 | ↑ | ↑ | ↑ | ↑ |
| TG 50:3 | ↑ | ↑ | ↑ | ↑ |
| TG 52:4 | ↑ | ↑ | ↑ | ↑ |
| TG 46:0 | ↑ | *ns* | ↓ | *ns* |
| TG 48:1 | *ns* | ↑ | *ns* | *ns* |
| TG 50:2 | ↑ | ↑ | ↑ | ↑ |
| TG 52:3 | ↑ | ↑ | ↑ | ↑ |
| TG 54:4 | ↑ | ↑ | *ns* | *ns* |
| TG 50:1 | ↑ | ↑ | ↓ | ↓ |
| TG 52:2 | ↑ | ↑ | ↓ | ↓ |
| TG 54:3 | ↓ | ↓ | *ns* | *ns* |
| TG 52:1 | ↓ | ↓ | ↓ | ↓ |
| TG 54:2 | ↓ | ↓ | ↓ | *ns* |
| TG 56:3 | ↓ | ↓ | ↑ | ↑ |
| TG 54:1 | ↓ | ↓ | ↓ | ↓ |

**Table S7.** Triacylglycerols (TG) identified in SU-DIPG-36 and SH-SY5Y cell lines and their relative trends upon 24 h treatment with **ONC201** and **26** (DA29). Legend: ↑, significant increase; ↓, significant decrease; *ns*, not significant; *nd*, not detected.

**9. Supplementary Figure S1**

| 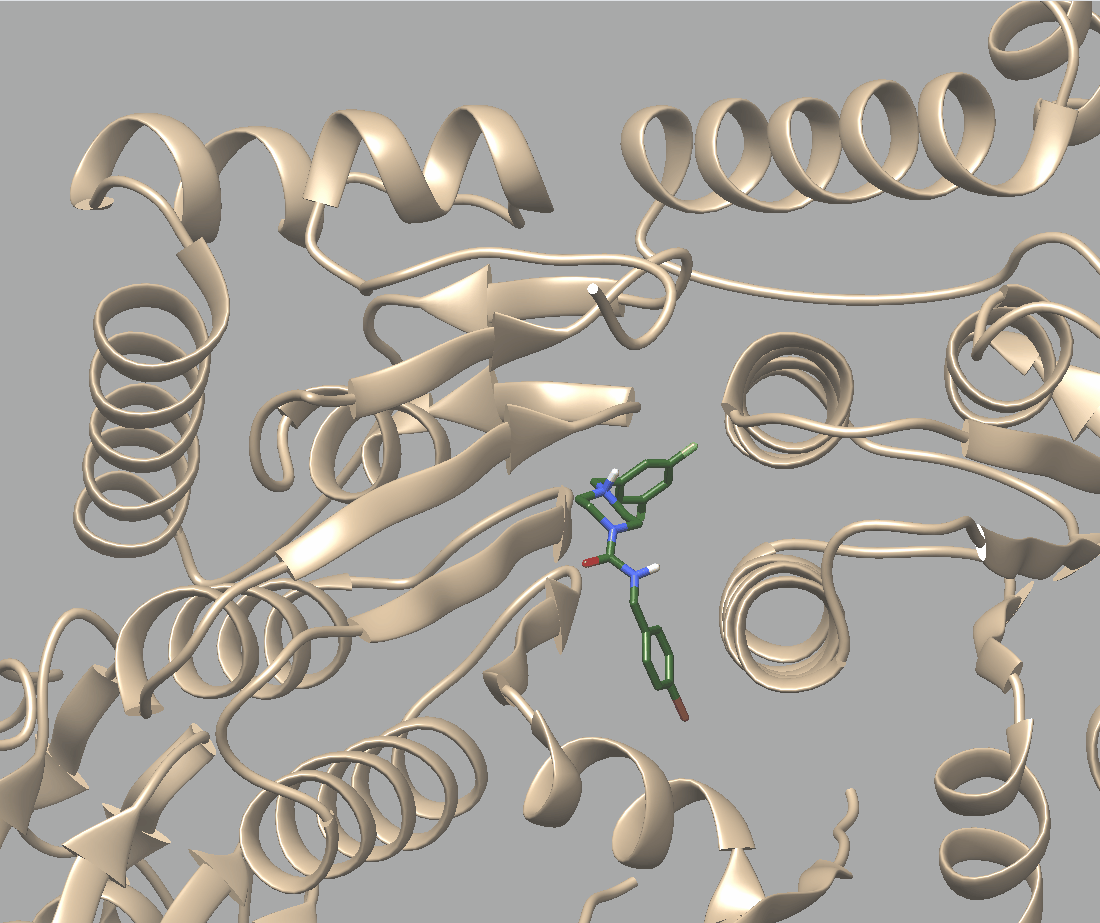 | 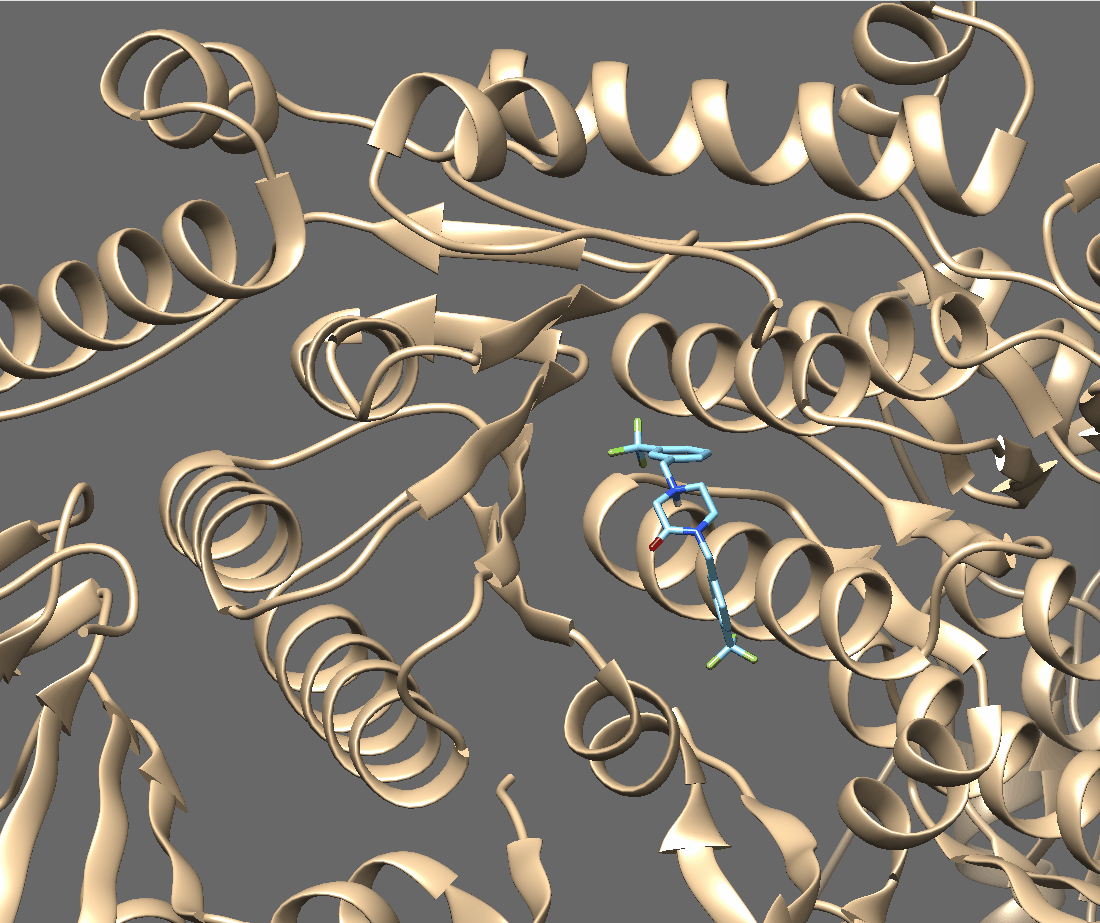 |
| --- | --- |
| **ZK53** | **26** (DA29) |

| **Candidate** | **Glob-Prod** | **Glob-Sum** | **Distance** | **H** | **N1** | **DRY** | **O** |
| --- | --- | --- | --- | --- | --- | --- | --- |
| **26** (DA29) | 0.71519 | 2.66693 | 9.37175 | 0.975046 | 0 | 1.61296 | 0.22648 |
| **ZK53** | 0.568031 | 2.32319 | 8.3225 | 0.961466 | 0.1117 | 1.53997 | 0.214764 |

FLAP analysis shows that **26** (DA29) achieves higher Glob-Prod and Glob-Sum scores than **ZK53**, reflecting a better field overlap. Both compounds share similar hydrogen-bonding contributions, but **26** (DA29) exhibits stronger hydrophobic interactions and slightly higher oxygen-based contributions, supporting its stronger binding profile. From the FLAP screening, **26** (DA29) occupies a lateral position within the pocket, comparable to **ZK53**. The 2D poses indicate highly similar interaction areas, with **26** (DA29) showing an increase in donor/acceptor hydrogen-bond regions. Both ligands interact with W146 and Y118 through π–π and CH–π contacts, while **26** (DA29) additionally engages V145 via hydrogen bonding. The two CF₃ groups of **26** (DA29) expand the interaction surface, enhancing binding (Data not shown).

Molecular docking with AutoDock Vina confirmed these findings: **26** (DA29) displayed a binding energy of −10.3 kcal/mol compared with −9.3 kcal/mol for **ZK53**, consistent with the stronger interaction profile predicted by FLAP. Computational studies were performed using FLAP (v2.2.2) in structure-based virtual screening mode. Molecular Interaction Fields (MIFs) were calculated with the GRID algorithm on the crystal structure of *h*ClpP in complex with **ZK53** (PDB code: 8HGK, 1.90 Å). Docking validation was conducted with AutoDock Vina (via UCSF Chimera) using grid boxes defined from the FLAP-identified pocket and visualized with PyMOL.

**10. Supplementary Figure S2**

**
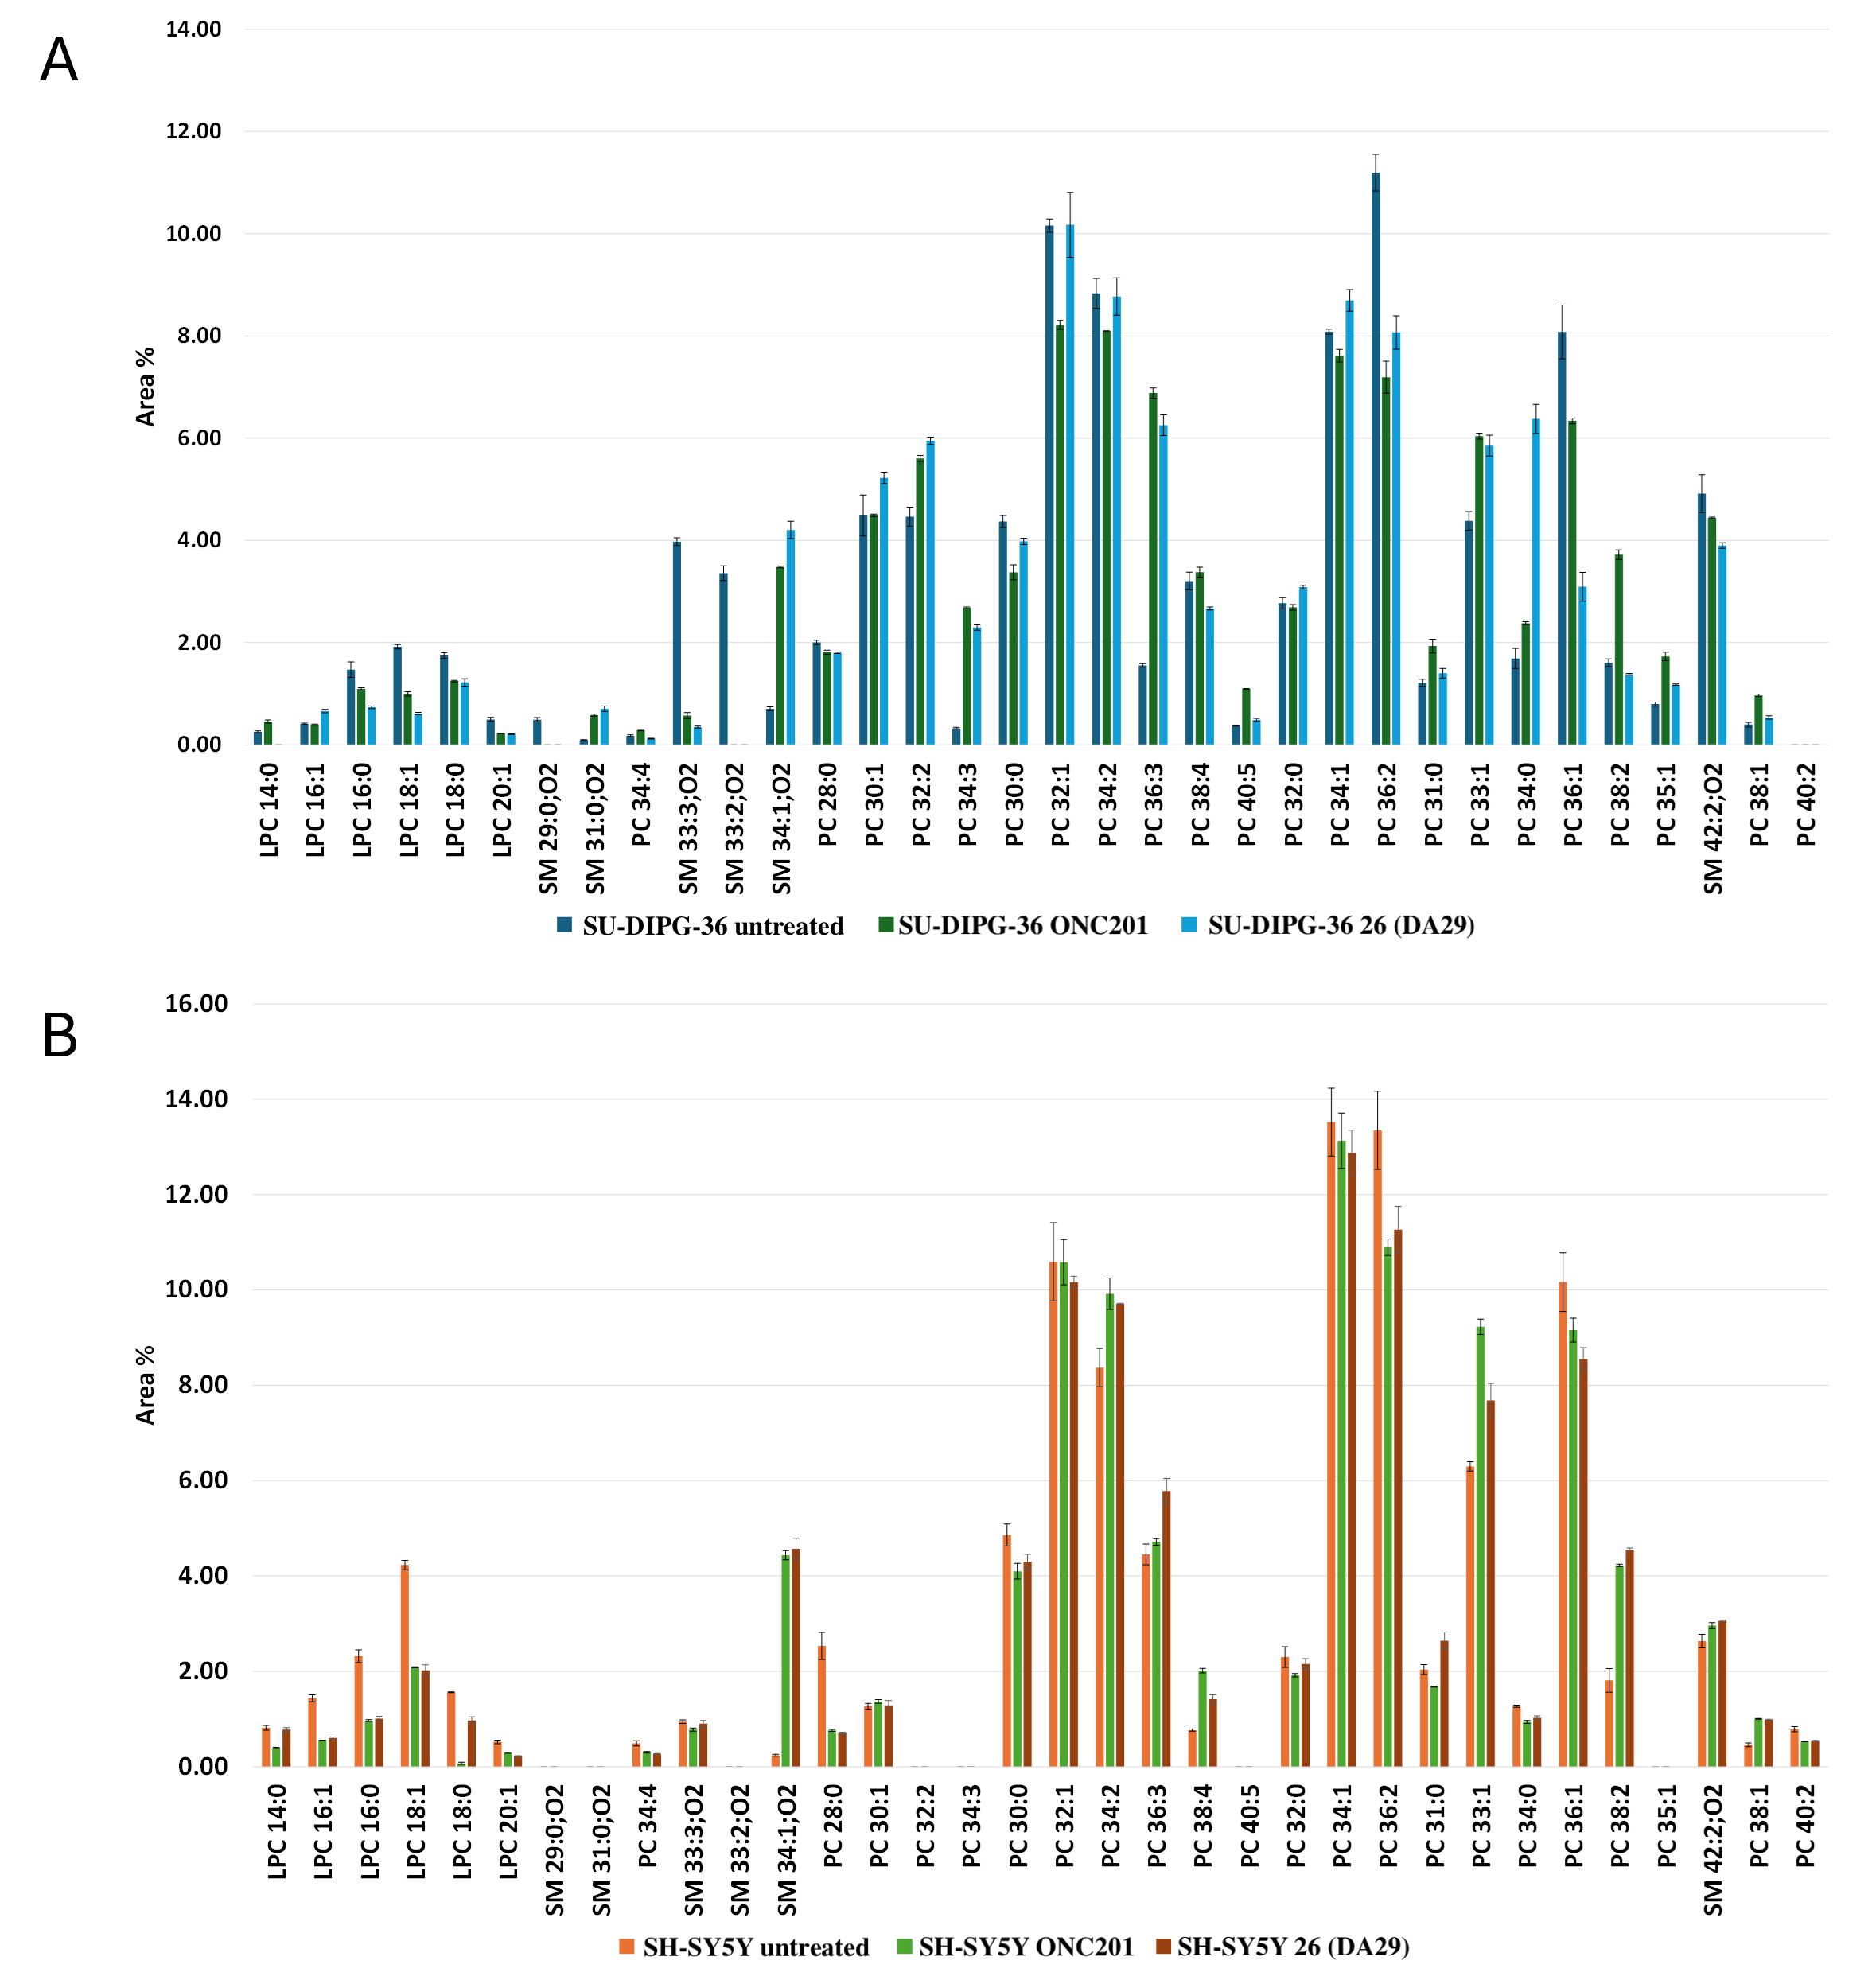
**

**Figure S2**. Histograms related to the percentage content of choline-containing lipids (LPCs, PCs and SMs), reported according to increasing retention time for SU-DIPG-36 (A) and SH-SY5Y (B) cells untreated and treated with **ONC201** and **26** (DA29). For each identified species, the error bars indicate the standard deviation.

**11. Supplementary Figure S3**

**
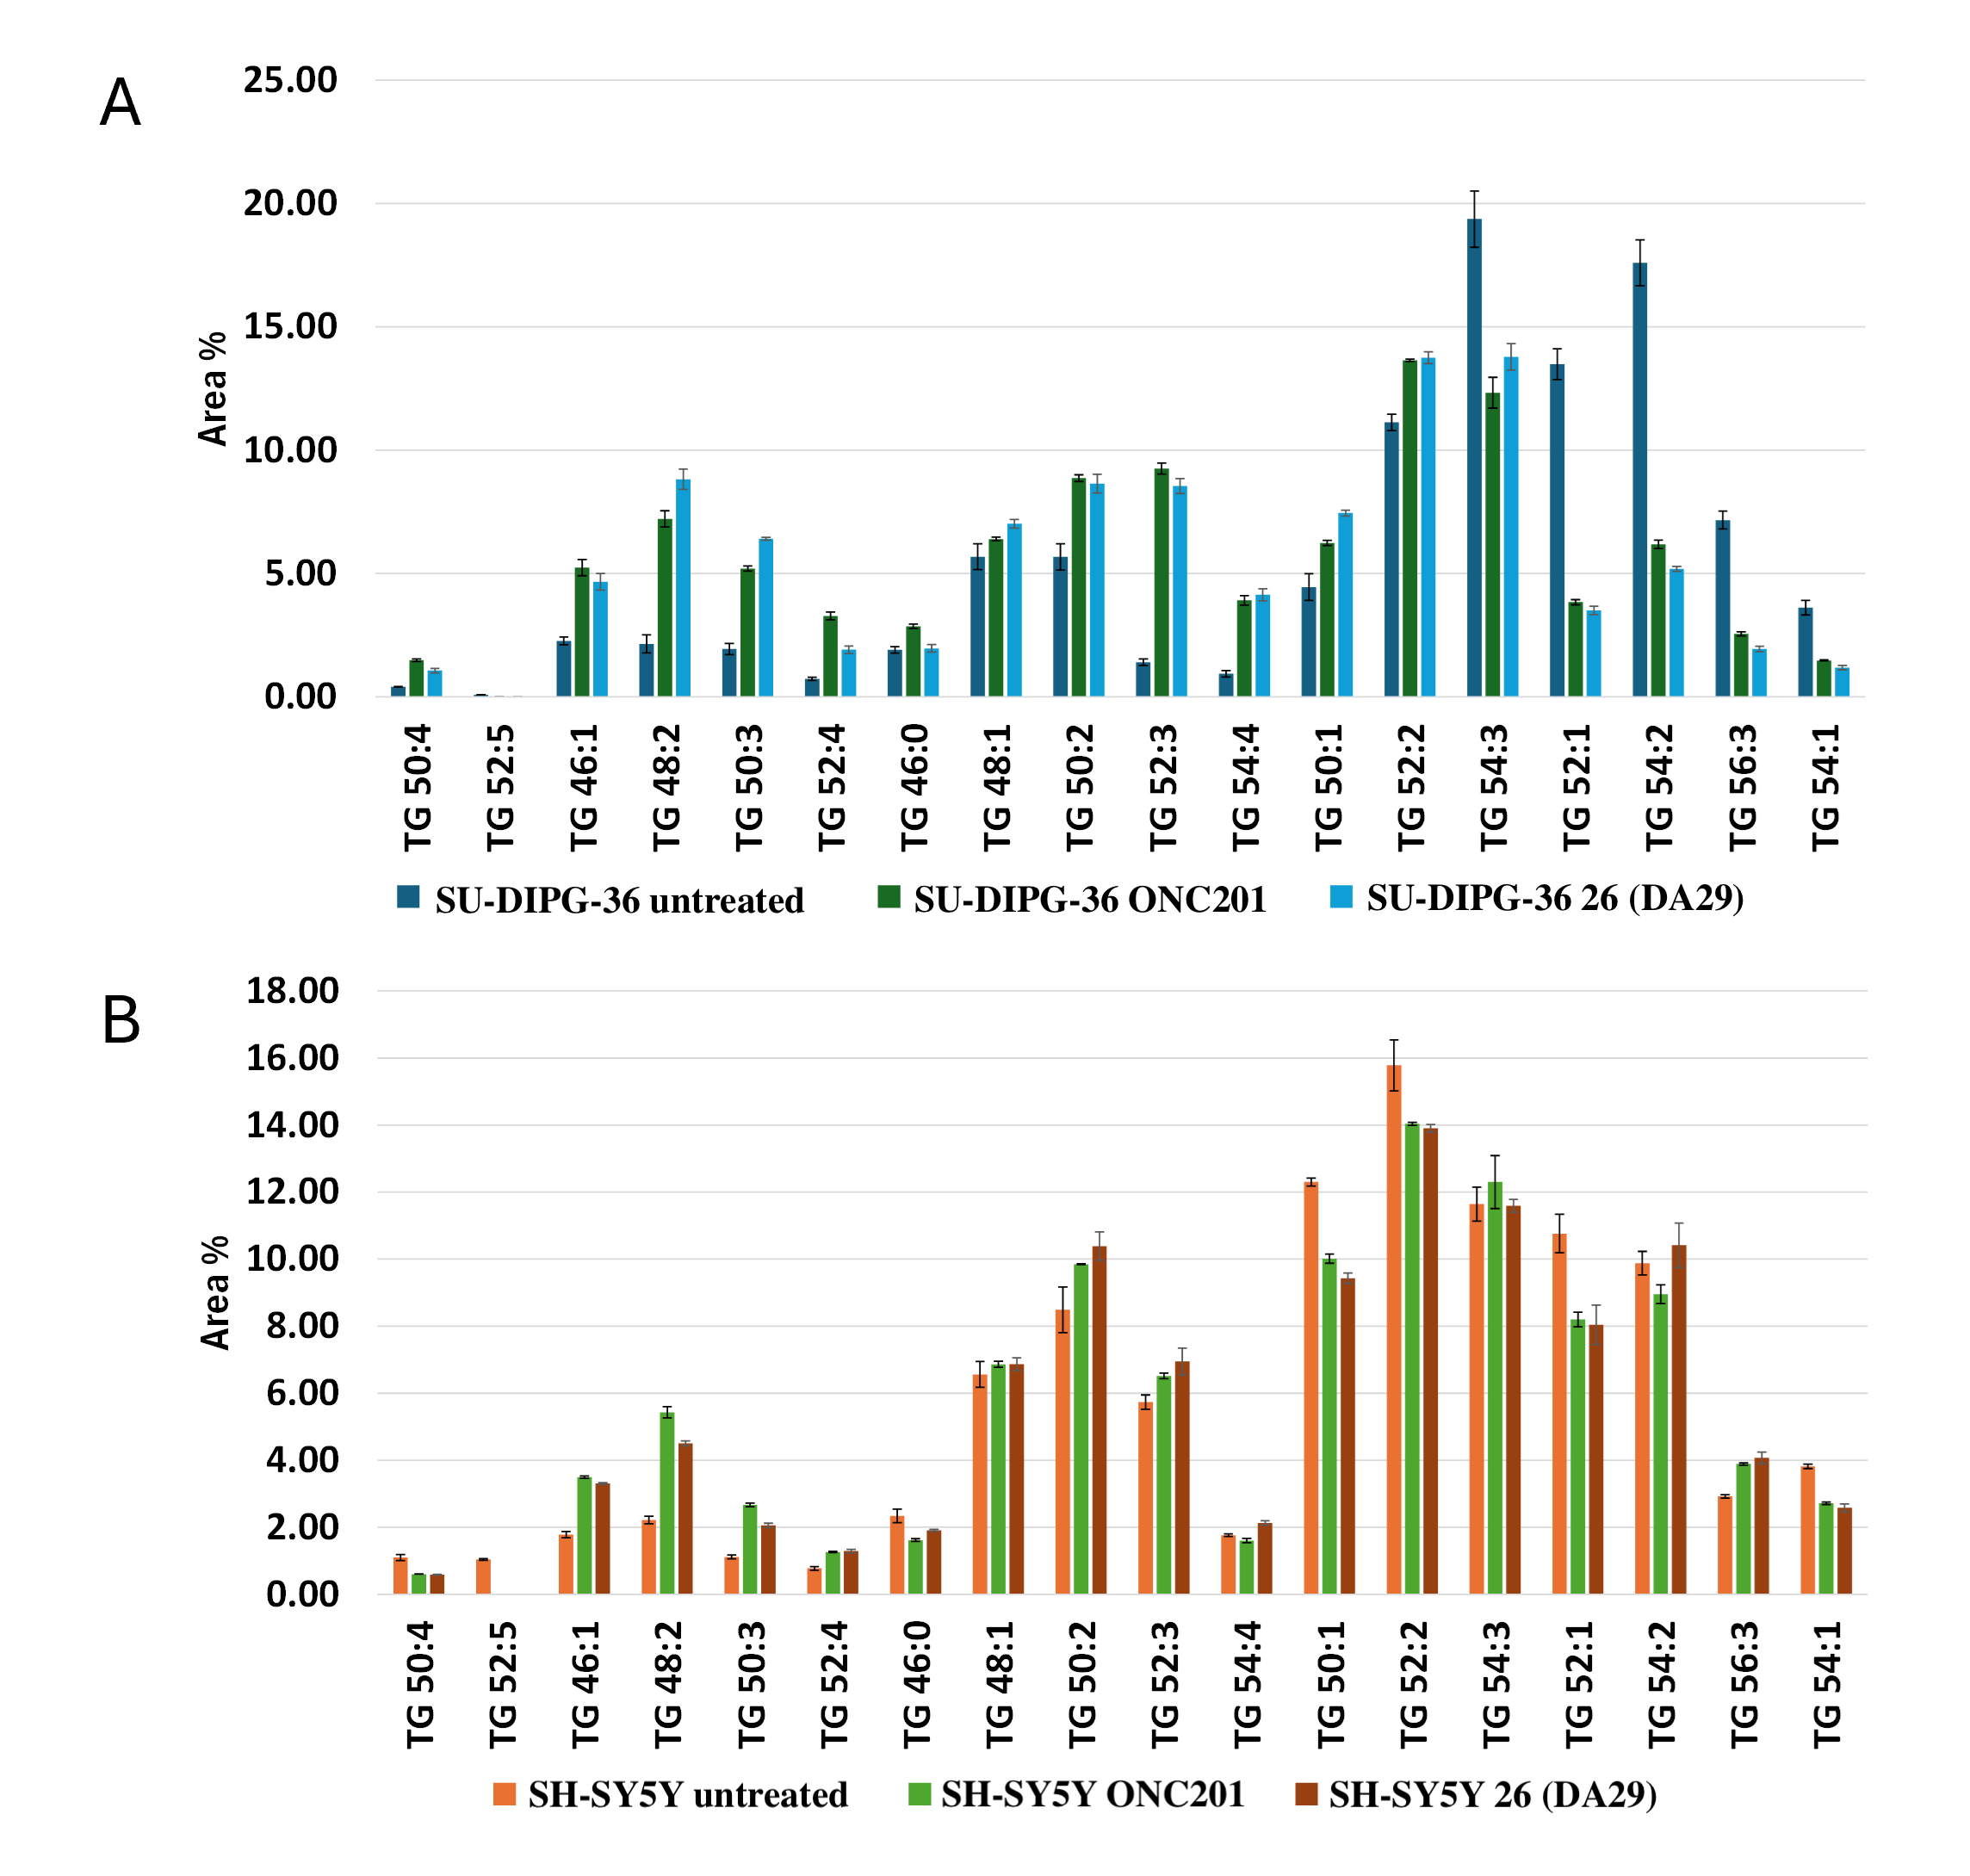
**

**Figure S3**. Histograms related to the percentage content of TGs, reported according to increasing retention time for SU-DIPG-36 (A) and SH-SY5Y (B) cells untreated and treated with **ONC201** and **26** (DA29). For each identified species, the error bars indicate the standard deviation.
